# Supplementary material for: Insights into a Cancer-Target Demethylase: Substrate Prediction through Systematic Specificity Analysis for KDM3A
Source: MDPI journal article supplement (doi:10.3390/biom12050641), 2022-04-27
Supplement: s1 [file s1]

# Insights into a cancer-target demethylase: substrate prediction through systematic specificity analysis for KDM3A

Anand Chopra <sup>1,2</sup>, William G. Willmore <sup>1,2,\*</sup> and Kyle K. Biggar <sup>1,2,\*</sup>

<sup>1</sup>Institute of Biochemistry, Carleton University, Ottawa, ON, Canada

<sup>2</sup>Department of Biology, Carleton University, Ottawa, ON, Canada

\*Correspondence: KKB (kyle.biggar@carleton.ca) and WGW (bill.willmore@carleton.ca)

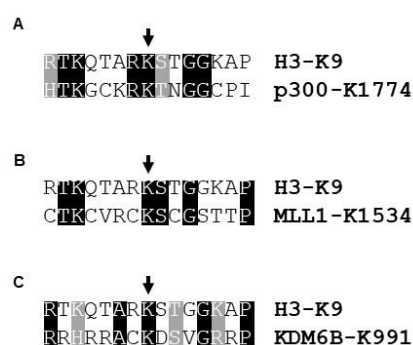

**Supplementary Figure S1.** Sequence alignment of the H3-K9 peptide with the newly identified *in vitro* substrates (A, p300-K1774; B, MLL1-K1534; C, KDM6B-K991) in Figure 4B. Black bars indicate exact residue match and gray bars indicate biochemical conservation. The location of the demethylation site is indicated by an arrow.

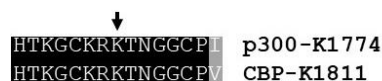

**Supplementary Figure S2.** Sequence alignment of the p300-K1774 15-mer peptide with a homologous region on CBP. Black bars indicate exact residue match and gray bars indicate biochemical conservation. The location of the demethylation site is indicated by an arrow.

**Supplementary Table S2.** Top scoring K-centered windows within the KDM3A interactome. Scoring was performed with a low-stringency KDM3A recognition motif (i.e., 0.5 threshold). All windows scored  $\geq 3\sigma$ 's above the population mean. Note that the methylation status of these predicted modification sites are currently unknown.

| Protein | UniProt ID | K-position | Scored Window | Score |
|---------|------------|------------|---------------|-------|
| H3      | P68431     | 10*        | QTARKSTGG     | 9     |
| RS4X    | P62701     | 259        | RLAAKQSSG     | 8     |
| KMT2A   | Q03164     | 234        | GVKIKITHG     | 7     |
| KMT2A   | Q03164     | 1534       | CVRCKSCGS     | 7     |
| HS71A   | P0DMV8     | 500        | GKANKITIT     | 7     |
| HS71B   | P0DMV9     | 500        | GKANKITIT     | 7     |
| HUWE1   | Q7Z6Z7     | 1470       | MTAIKRNGA     | 7     |
| HUWE1   | Q7Z6Z7     | 3745       | NKKAKQTGR     | 7     |
| KDM6B   | O15054     | 991        | RRACKDSVG     | 7     |
| MRTFB   | Q9ULH7     | 879        | EEAIKQTRS     | 7     |
| MYC     | P01106     | 157        | QAARKDSGS     | 7     |
| RASF6   | Q6ZTQ3     | 32         | KKEEKMTMM     | 7     |

|       |        |      |           |   |
|-------|--------|------|-----------|---|
| VIR   | Q69YN4 | 576  | HLAEKTSSL | 7 |
| EP300 | Q09472 | 1774 | GCKRKTNGG | 7 |
| ARI1A | O14497 | 2189 | IAVQKGSIG | 7 |
| JAK2  | O60674 | 73   | IAASKACGI | 7 |
| HNRPF | P52597 | 167  | ELAEKALGK | 7 |
| CAPZB | P47756 | 159  | EVQEKSSGR | 7 |

\* Denoted as such due to presence of N-terminal methionine within databases. Traditionally referred to as the 9th residue within literature.

**Supplementary Table S5.** Tabular form of the protein-protein association network depicted in Figure 5. The type of interaction that was identified by STRING is shown in each column, where green check marks indicate the presence of this interaction and dashes indicate the interaction was not determined.

| Interactor<br>1 | Interactor<br>2 | Experimentally<br>Determined | Curated<br>Database | Textmining | Co-expression | Gene<br>Neighborhood |
|-----------------|-----------------|------------------------------|---------------------|------------|---------------|----------------------|
| EP300           | SIRT1           | ✓                            | ✓                   | ✓          | ✓             | -                    |
| EP300           | MYOD1           | ✓                            | ✓                   | ✓          | -             | -                    |
| EP300           | KDM6B           | ✓                            | -                   | ✓          | ✓             | -                    |
| EP300           | MDM2            | ✓                            | ✓                   | ✓          | -             | -                    |
| EP300           | SMAD2           | ✓                            | ✓                   | ✓          | ✓             | -                    |
| EP300           | YY1             | ✓                            | ✓                   | ✓          | ✓             | -                    |
| EP300           | KMT2A           | ✓                            | ✓                   | ✓          | ✓             | -                    |
| KDM6B           | SIRT1           | ✓                            | -                   | ✓          | ✓             | ✓                    |
| KDM6B           | KMT2A           | ✓                            | -                   | ✓          | ✓             | -                    |
| KDM6B           | SMAD2           | ✓                            | -                   | ✓          | -             | -                    |
| KMT2A           | SIRT1           | ✓                            | -                   | ✓          | ✓             | -                    |
| MDM2            | SIRT1           | ✓                            | -                   | ✓          | ✓             | -                    |
| MDM2            | SMAD2           | -                            | -                   | ✓          | ✓             | -                    |
| MDM2            | YY1             | ✓                            | ✓                   | ✓          | -             | -                    |
| MYOD1           | SIRT1           | ✓                            | ✓                   | ✓          | -             | -                    |
| MYOD1           | YY1             | ✓                            | -                   | ✓          | -             | -                    |
| MYOD1           | SMAD2           | ✓                            | -                   | ✓          | -             | -                    |
| SIRT1           | SMAD2           | ✓                            | -                   | ✓          | ✓             | -                    |
| SIRT1           | YY1             | ✓                            | -                   | ✓          | ✓             | -                    |
| SMAD2           | YY1             | ✓                            | -                   | ✓          | ✓             | -                    |
