# Supplementary material for: Insights into a Cancer-Target Demethylase: Substrate Prediction through Systematic Specificity Analysis for KDM3A
Source: Biomolecules. 2022 Apr 27;12(5):641. doi: 10.3390/biom12050641 (PMC9139010; doi:10.3390/biom12050641)
Supplement: Supplementary file 1 [file biomolecules-12-00641-s001.zip]

Archive with 4 entries (4 files):
- biomolecules-1664957-supp-for proof.pdf
- Supplementary Table 4A-C.xlsx
- Supplementary Tables 1A-C.xlsx
- Supplementary Tables 3A-C.xlsx
