# Supplementary material for: Insights into a Cancer-Target Demethylase: Substrate Prediction through Systematic Specificity Analysis for KDM3A
Source: Biomolecules. 2022 Apr 27;12(5):641. doi: 10.3390/biom12050641 (PMC9139010; doi:10.3390/biom12050641)
Supplement: Supplementary file 1 [file biomolecules-12-00641-s001.zip › Supplementary Tables 1A-C.xlsx]

## Sheet: 0.5_low-stringency PSSM
Supplementary Table 1A. PeSA 0.5 threshold adjusted KDM3A substrate specificity profile associated with Figure 3B.
		Amino acid substitutions
Wild-type H3K9 sequence		A	R	N	D	C	Q	E	G	H	I	L	K	M	F	P	S	T	W	Y	V
	Q	0	1	1	0	1	1	1	1	1	1	1	1	1	0	0	0	0	0	0	0
	T	1	1	1	0	1	1	1	0	1	1	1	1	1	0	0	0	1	0	0	1
	A	1	0	0	0	0	0	0	0	0	0	0	0	0	0	0	0	0	0	0	0
	R	1	1	1	1	1	1	1	0	1	1	0	0	1	0	0	0	0	0	0	0
	K	0	0	0	0	0	0	0	0	0	0	0	1	0	0	0	0	0	0	0	0
	S	1	1	0	0	1	1	0	1	0	1	0	1	1	0	0	1	1	0	0	0
	T	0	0	0	0	1	0	0	0	0	0	0	0	0	0	0	1	1	0	0	0
	G	0	0	0	0	0	0	0	1	0	0	0	0	1	0	0	0	0	0	0	0
	G	0	0	0	0	0	0	0	1	0	0	0	0	0	0	0	0	0	0	0	0

## Sheet: 0.75_medium-stringency PSSM
Supplementary Table 1A. PeSA 0.75 threshold adjusted KDM3A substrate specificity profile associated with Figure 3B.
		Amino acid substitutions
Wild-type H3K9 sequence		A	R	N	D	C	Q	E	G	H	I	L	K	M	F	P	S	T	W	Y	V
	Q	0	1	1	0	1	1	0	1	1	0	0	1	1	0	0	0	0	0	0	0
	T	1	1	0	0	1	1	0	0	0	1	1	1	0	0	0	0	1	0	0	1
	A	1	0	0	0	0	0	0	0	0	0	0	0	0	0	0	0	0	0	0	0
	R	1	1	0	1	1	0	0	0	0	0	0	0	0	0	0	0	0	0	0	0
	K	0	0	0	0	0	0	0	0	0	0	0	1	0	0	0	0	0	0	0	0
	S	1	1	0	0	1	0	0	0	0	0	0	1	0	0	0	1	1	0	0	0
	T	0	0	0	0	1	0	0	0	0	0	0	0	0	0	0	0	1	0	0	0
	G	0	0	0	0	0	0	0	1	0	0	0	0	1	0	0	0	0	0	0	0
	G	0	0	0	0	0	0	0	1	0	0	0	0	0	0	0	0	0	0	0	0

## Sheet: 1.00_high-stringency PSSM 
Supplementary Table 1C. PeSA 1.00 threshold adjusted KDM3A substrate specificity profile associated with Figure 3B.
		Amino acid substitutions
Wild-type H3K9 sequence		A	R	N	D	C	Q	E	G	H	I	L	K	M	F	P	S	T	W	Y	V
	Q	0	1	0	0	1	1	0	1	0	0	0	0	0	0	0	0	0	0	0	0
	T	1	1	0	0	1	1	0	0	0	1	0	1	0	0	0	0	1	0	0	1
	A	1	0	0	0	0	0	0	0	0	0	0	0	0	0	0	0	0	0	0	0
	R	0	1	0	0	0	0	0	0	0	0	0	0	0	0	0	0	0	0	0	0
	K	0	0	0	0	0	0	0	0	0	0	0	1	0	0	0	0	0	0	0	0
	S	0	1	0	0	0	0	0	0	0	0	0	0	0	0	0	1	1	0	0	0
	T	0	0	0	0	0	0	0	0	0	0	0	0	0	0	0	0	1	0	0	0
	G	0	0	0	0	0	0	0	1	0	0	0	0	1	0	0	0	0	0	0	0
	G	0	0	0	0	0	0	0	1	0	0	0	0	0	0	0	0	0	0	0	0
