# Supplementary material for: Insights into a Cancer-Target Demethylase: Substrate Prediction through Systematic Specificity Analysis for KDM3A
Source: Biomolecules. 2022 Apr 27;12(5):641. doi: 10.3390/biom12050641 (PMC9139010; doi:10.3390/biom12050641)
Supplement: Supplementary file 1 [file biomolecules-12-00641-s001.zip › Supplementary Tables 3A-C.xlsx]

## Sheet: low stringency (0.5) scoring
Supplementary Table 3A. KDM3A interactome peptides scored with PeSA 0.5 threshold adjusted KDM3A PSSM
uniprot_id	position	window
P68431	10	QTARKSTGG	9
P62701	259	RLAAKQSSG	8
Q03164	234	GVKIKITHG	7
Q03164	1534	CVRCKSCGS	7
P0DMV8	500	GKANKITIT	7
P0DMV9	500	GKANKITIT	7
Q7Z6Z7	1470	MTAIKRNGA	7
Q7Z6Z7	3745	NKKAKQTGR	7
O15054	991	RRACKDSVG	7
Q9ULH7	879	EEAIKQTRS	7
P01106	157	QAARKDSGS	7
Q6ZTQ3	32	KKEEKMTMM	7
Q69YN4	576	HLAEKTSSL	7
Q09472	1774	GCKRKTNGG	7
O14497	2189	IAVQKGSIG	7
O60674	73	IAASKACGI	7
P52597	167	ELAEKALGK	7
P47756	159	EVQEKSSGR	7
Q03164	257	LKKIKRTPS	6
Q03164	818	QRPRKQTSA	6
Q03164	963	KILIKKGRG	6
Q03164	1113	GNDDKSSIA	6
Q03164	1218	KKKEKKSKT	6
Q03164	1714	GVKRKMDQG	6
Q03164	2517	QAPRKRTVK	6
Q03164	2769	EHVTKSSVG	6
Q03164	3384	NLLIKASQQ	6
Q03164	3962	NCGAKKCRK	6
Q9Y4C1	332	NLGAKIPQG	6
Q9Y4C1	779	LAGEKPTLG	6
Q9Y4C1	918	LVQNKTTSD	6
Q9Y2Z0	330	RAMNKSFME	6
Q12931	151	TNAEKGTIT	6
P07900	147	LVAEKVTVI	6
P07900	269	EEEEKKDGD	6
P07900	564	KQEEKKTKF	6
P0DMV8	271	CERAKRTLS	6
P0DMV8	493	TATDKSTGK	6
P0DMV9	271	CERAKRTLS	6
P0DMV9	493	TATDKSTGK	6
P11142	271	CERAKRTLS	6
P11142	493	SAVDKSTGK	6
P11142	500	GKENKITIT	6
P62424	120	ARAEKKAAG	6
P62424	197	LVHRKTCTT	6
P15880	238	GNFAKATFD	6
P31689	73	EQAIKEGGA	6
P31689	194	KDRCKSCNG	6
O95816	9	KINAKANEG	6
O60884	158	GAVQKCSAC	6
O60884	203	KDRCKKCEG	6
P62701	71	QRFIKIDGK	6
P62701	128	CKVRKIFVG	6
P10275	291	LAECKGSLL	6
P10275	846	IIACKRKNP	6
Q8N6H7	222	PAAAKKGLG	6
Q8N6H7	228	GLGAKKGLG	6
P35226	235	CKRMKISHQ	6
P35226	314	NRPRKSSVN	6
O60885	177	IVQAKGRGR	6
O60885	184	GRGRKETGT	6
O60885	1330	ELARKREQE	6
Q14781	191	KTARKDLGA	6
Q14781	283	QATNKCGLG	6
Q14781	451	GEARKAATL	6
O00257	205	GAGAKGYLG	6
O00257	278	MQAVKIKSG	6
Q5VYK3	738	EQLIKTTKD	6
Q5VYK3	1261	CLLDKGMMS	6
Q5VYK3	1336	LSAAKSSPM	6
Q15056	123	RKQDKGGFG	6
O00321	294	MNYEKLSRG	6
P22102	169	EEACKAVQE	6
P22102	178	IMQEKAFGA	6
P22102	411	LAAIKFEGA	6
P22102	633	KIVAKSSLQ	6
Q13630	199	VHLAKSSGS	6
P68431	28	KAARKSAPA	6
P68431	57	RRYQKSTEL	6
Q16665	310	RMLAKRGGY	6
Q16665	719	NAQRKRKME	6
Q7Z6Z7	231	EQLDKISES	6
Q7Z6Z7	318	QITDKQLME	6
Q7Z6Z7	1964	EEADKSDPK	6
Q7Z6Z7	3257	KKSSKSCGS	6
Q7Z6Z7	3370	ERGNKACSP	6
Q7Z6Z7	3742	RRANKKAKQ	6
Q8IU81	394	EAAGKMTTE	6
Q8IU81	536	REFIKAQGP	6
O15054	185	HLEHKRNYG	6
Q8IZQ8	138	KEAIKGNQV	6
Q8IZQ8	277	QKAEKSPPP	6
P61218	101	LKARKIPII	6
P36873	60	EAPLKICGD	6
O14744	380	LRAAKQADR	6
O43353	326	HLCDKKKME	6
O43353	513	LKDNKQMGL	6
P42226	194	LEAAKALVL	6
P42226	369	LKKIKRCER	6
P42226	374	RCERKGTES	6
Q07912	48	EDLEKIGMG	6
Q07912	73	LCKRKSWMS	6
Q07912	961	RPADKIQMA	6
Q69YN4	1236	LASHKACKL	6
Q69YN4	1558	ELSEKCCSD	6
Q69YN4	1683	KVSQKISSR	6
P37231	145	VCGDKASGF	6
P37231	184	CRIHKKSRN	6
P37231	466	KLLQKMTDL	6
P37231	485	LQVIKKTET	6
P51532	744	ERVDKQSAL	6
P51532	800	LMEHKRING	6
P51532	1027	EKDKKGKGG	6
P51532	1044	MQLRKICNH	6
P51532	1365	EEEEKMFGR	6
P51532	1407	EVRQKKSSR	6
Q09472	350	LHAHKCQRR	6
Q09472	636	LLAEKIYKI	6
Q09472	1554	KKNNKKTSK	6
P04637	139	CQLAKTCPV	6
O94953	608	KMEIKKSRR	6
O94953	860	RKRMKKVSG	6
O94953	907	CLKHKSGGH	6
Q9HAZ2	12	RKLAKSDGD	6
Q9HAZ2	101	GVWAKRKME	6
Q9HAZ2	122	RAAAKETDF	6
Q9HAZ2	426	QIKCKDCGQ	6
Q9HAZ2	714	GMQEKKLGS	6
Q9HAZ2	915	FAAMKADSG	6
O14497	984	KMNNKADGT	6
Q92925	185	QEAIKKPLT	6
P17252	141	MNVHKQCVI	6
P17252	307	QKFEKAKLG	6
P17252	347	MVLGKGSFG	6
P17252	359	LADRKGTEE	6
P17252	579	KHPAKRLGC	6
P22694	64	LVKHKATEQ	6
P22694	250	QIYEKIVSG	6
P22612	250	QIYEKIVSG	6
P13861	248	NNAKKRKMF	6
P31323	46	ENERKGTAR	6
P31323	263	NNAKKRKMY	6
P31323	326	KITMKRKGK	6
O60674	736	LATDKWSFG	6
P47756	181	LQTNKSGSG	6
P08151	302	EKPHKCTFE	6
O75582	68	FLVRKISGH	6
O75582	446	KCVHKKSNQ	6
O75582	473	ITALKLCEG	6
O75582	677	NKRLKMSGL	6
O75582	747	RRKMKKTST	6
P55072	677	EFLAKMTNG	6
P49368	31	INAAKTIAD	6
P49368	203	ARVEKIPGG	6
P49368	353	LLEIKKIGD	6
P51114	246	QQARKVPGV	6
P51114	562	LAKNKKEMA	6
P03372	171	STNDKGSMA	6
P03372	235	KNRRKSCQA	6
P03372	362	INWAKRVPG	6
P03372	481	RVLDKITDT	6
Q03164	220	KSIEKKRGR	5
Q03164	269	QQATKIKKL	5
Q03164	277	LRAGKLSPL	5
Q03164	295	QIGRKGVQI	5
Q03164	313	TERIKTPSG	5
Q03164	332	QKVRKDKEG	5
Q03164	380	LQRAKKGAQ	5
Q03164	381	QRAKKGAQK	5
Q03164	385	KGAQKKIEK	5
Q03164	461	GSSEKSSAA	5
Q03164	737	NRKRKRKVF	5
Q03164	853	RNKDKAPEE	5
Q03164	866	RDADKSVEK	5
Q03164	885	EKENKRESR	5
Q03164	892	SRKEKRKKG	5
Q03164	894	KEKRKKGSE	5
Q03164	895	EKRKKGSEI	5
Q03164	929	SSAKKATGR	5
Q03164	934	ATGRKKSSS	5
Q03164	964	ILIKKGRGN	5
Q03164	971	GNLEKTNLD	5
Q03164	987	LEKEKTLCL	5
Q03164	1015	AQADKLPMT	5
Q03164	1031	LKKAKAQLC	5
Q03164	1039	CKIEKSKSL	5
Q03164	1103	EEREKILSS	5
Q03164	1176	NCLDKPKFG	5
Q03164	1185	GRNIKKQCC	5
Q03164	1186	RNIKKQCCK	5
Q03164	1190	KQCCKMRKC	5
Q03164	1193	CKMRKCQNL	5
Q03164	1211	QKQAKAVKK	5
Q03164	1221	EKKSKTSEK	5
Q03164	1225	KTSEKKDSK	5
Q03164	1270	PVEEKSEEG	5
Q03164	1293	PASRKSSKQ	5
Q03164	1321	KEVPKTTPS	5
Q03164	1480	CRRCKFCHV	5
Q03164	1493	HQATKQLLE	5
Q03164	1500	LECNKCRNS	5
Q03164	1565	KLFAKGNFC	5
Q03164	1668	RQAAKPPDL	5
Q03164	1712	LEGVKRKMD	5
Q03164	2063	TDARKRCVY	5
Q03164	2307	LKGEKTKVL	5
Q03164	2314	VLSSKSSEG	5
Q03164	2430	RQKGKKSCK	5
Q03164	2431	QKGKKSCKE	5
Q03164	2434	KKSCKETFK	5
Q03164	2490	KIGDKGLSM	5
Q03164	2540	KNALKESSP	5
Q03164	2658	KKRGKRSAE	5
Q03164	2736	ATTRKSSQI	5
Q03164	3101	GVTQKIQLT	5
Q03164	3287	PNIIKRSKS	5
Q03164	3290	IKRSKSSIM	5
Q03164	3462	LLASKTGIH	5
Q03164	3499	LEQNKALSS	5
Q03164	3549	LPLDKGNGK	5
Q03164	3556	GKKHKVSHL	5
Q03164	3602	QSSQKECGQ	5
Q03164	3655	QQEQKRKES	5
Q03164	3657	EQKRKESIT	5
Q03164	3825	RHLKKTSKE	5
Q03164	3846	GLFCKRNID	5
Q03164	3870	IQTDKREKY	5
Q03164	3933	FAMRKIYRG	5
Q9Y4C1	100	LAERKSPEI	5
Q9Y4C1	122	PLLDKAGLG	5
Q9Y4C1	188	LKGDKNLVG	5
Q9Y4C1	263	AVKRKSSEN	5
Q9Y4C1	277	SKQAKSCSE	5
Q9Y4C1	339	QGCHKQSLP	5
Q9Y4C1	371	GLLSKSSQI	5
Q9Y4C1	387	LTEPKGSCT	5
Q9Y4C1	421	CLPTKASSK	5
Q9Y4C1	562	KEQQKDSPV	5
Q9Y4C1	652	QVAWKRAVK	5
Q9Y4C1	656	KRAVKGVRE	5
Q9Y4C1	693	RMKRKNCQQ	5
Q9Y4C1	702	GAAYKTFSW	5
Q9Y4C1	771	KEDLKQTSL	5
Q9Y4C1	805	EAASKPAGS	5
Q9Y4C1	839	ENKEKQPTM	5
Q9Y4C1	851	KNEIKCLPP	5
Q9Y4C1	933	GLTIKPSIL	5
Q9Y4C1	1038	LKNEKEPMV	5
Q9Y4C1	1161	ELTIKRFIE	5
Q9Y4C1	1180	IYAAKDTEK	5
Q9Y2Z0	69	VADAKKSLE	5
Q9Y2Z0	152	SVWIKRCQE	5
Q9Y2Z0	289	RNWDKLVGE	5
Q9Y2Z0	302	EKNEKLEGD	5
Q12931	196	EASSKIIGQ	5
Q12931	375	LIQTKATDI	5
Q12931	518	YEAMKKKDT	5
Q12931	544	REFDKKKLI	5
Q12931	577	CLSEKETEE	5
Q12931	629	QQLAKTQEE	5
Q12931	652	HALIKKLNQ	5
P07900	84	LIPNKQDRT	5
P07900	112	GTIAKSGTK	5
P07900	250	EKEEKESED	5
P07900	292	EELNKTKPI	5
P07900	418	KNLVKKCLE	5
P07900	573	ENLCKIMKD	5
P07900	615	ERIMKAQAL	5
P07900	631	YMAAKKHLE	5
P08238	107	GTIAKSGTK	5
P08238	142	LVAEKVVVI	5
P08238	284	EELNKTKPI	5
P08238	410	KNIVKKCLE	5
P08238	481	KETQKSIYY	5
P08238	505	ERVRKRGFE	5
P08238	550	DEEEKKKME	5
P08238	573	EILDKKVEK	5
P08238	577	KKVEKVTIS	5
P08238	607	ERIMKAQAL	5
P0DMV8	159	RQATKDAGV	5
P0DMV8	220	IFEVKATAG	5
P0DMV8	250	KRKHKKDIS	5
P0DMV8	384	LMGDKSENV	5
P0DMV8	507	ITNDKGRLS	5
P0DMV8	524	QEAEKYKAE	5
P0DMV8	561	GLKGKISEA	5
P0DMV8	567	SEADKKKVL	5
P0DMV8	573	KVLDKCQEV	5
P0DMV9	159	RQATKDAGV	5
P0DMV9	220	IFEVKATAG	5
P0DMV9	250	KRKHKKDIS	5
P0DMV9	384	LMGDKSENV	5
P0DMV9	507	ITNDKGRLS	5
P0DMV9	524	QEAEKYKAE	5
P0DMV9	561	GLKGKISEA	5
P0DMV9	567	SEADKKKVL	5
P0DMV9	573	KVLDKCQEV	5
P11142	159	RQATKDAGT	5
P11142	220	IFEVKSTAG	5
P11142	250	KRKHKKDIS	5
P11142	361	KELNKSINP	5
P11142	507	ITNDKGRLS	5
P11142	524	QEAEKYKAE	5
P11142	535	KQRDKVSSK	5
P11142	573	KILDKCNEI	5
P11142	589	QTAEKEEFE	5
P11142	601	KELEKVCNP	5
P62424	8	GKKAKGKKV	5
P62424	25	KQEAKKVVN	5
P62424	101	KLAHKYRPE	5
P62424	121	RAEKKAAGK	5
P62424	125	KAAGKGDVP	5
P62424	150	LVENKKAQL	5
P62424	187	IIKGKARLG	5
P62424	257	LEKAKAKEL	5
P15880	58	KAEDKEWMP	5
P15880	114	MPVQKQTRA	5
P15880	142	GLGVKCSKE	5
P15880	159	IILAKLSIV	5
P15880	183	TVPCKVTGR	5
P31689	66	ELYDKGGEQ	5
P31689	136	VICDKCEGR	5
P31689	200	CNGRKIVRE	5
P31689	205	IVREKKILE	5
P31689	221	KDGQKITFH	5
O95816	5	MAQAKINAK	5
O95816	168	LEDQKKIKR	5
O95816	171	QKKIKRRLE	5
O95816	186	ENSDKAIKL	5
O95816	195	LEHSKGAGS	5
O60884	347	INPDKLSEL	5
P62701	22	WMLDKLTGV	5
P62701	63	DEVKKICMQ	5
P62701	168	LETGKITDF	5
P62701	254	EERDKRLAA	5
Q99598	40	MLAFKSFQQ	5
Q99598	100	GVRQKIFQV	5
Q99598	138	QHFIKTRSL	5
Q99598	164	GKENKTPSS	5
Q99598	173	DAQDKQFGT	5
P68032	52	GMGQKDSYV	5
P68032	120	ANREKMTQI	5
P10275	241	KELCKAVSV	5
P10275	521	PTCVKSEMG	5
P10275	619	CRLRKCYEA	5
P10275	659	ETTQKLTVS	5
P10275	721	VKWAKALPG	5
P10275	778	YRMHKSRMY	5
P10275	884	DLLIKSHMV	5
Q8N6H7	203	GTSPKASLE	5
Q8N6H7	223	AAAKKGLGA	5
Q8N6H7	229	LGAKKGLGA	5
Q8N6H7	235	LGAQKVSSQ	5
Q8N6H7	253	QVAEKLREQ	5
Q8N6H7	286	QIDRKKEEK	5
Q8N6H7	290	KKEEKKLQN	5
Q8N6H7	336	PVSAKSSRS	5
Q8N6H7	424	EARQKFAGA	5
Q8N6H7	497	KQGVKSVAG	5
P56211	20	EMEDKVTSP	5
P56211	42	HLGQKPGGS	5
P56211	55	KRLQKGQKY	5
P56211	69	YNMAKAKMK	5
P56211	71	MAKAKMKNK	5
P56211	75	KMKNKQLPT	5
P56211	109	LVASKLAG	5
P35226	8	TTRIKITEL	5
P35226	40	HSFCKTCIV	5
P35226	73	IRSDKTLQD	5
P35226	92	KNEMKRRRD	5
P35226	161	EVNDKRYLR	5
O60885	102	YKIIKTPMD	5
O60885	291	GVKRKADTT	5
O60885	346	PAPEKSSKV	5
O60885	355	SEQLKCCSG	5
O60885	367	EMFAKKHAA	5
O60885	456	MRFAKMPDE	5
O60885	543	KEKDKKEKK	5
O60885	552	KEKHKRKEE	5
O60885	561	VEENKKSKA	5
O60885	606	EEEDKCKPM	5
O60885	724	EMAPKSKKK	5
O60885	736	GREQKKHHH	5
O60885	794	APAMKSSPP	5
O60885	1239	EEREKALKA	5
O60885	1242	EKALKAQAE	5
O60885	1250	EHAEKEKER	5
Q14781	24	KRLRKGKLE	5
Q14781	60	LAFQKKEHE	5
Q14781	74	RKRGKRPRG	5
Q14781	82	GRPRKLTAM	5
Q14781	215	LAALKAHAK	5
Q14781	219	KAHAKEACG	5
Q14781	277	RLALKAQAT	5
Q14781	296	VRTQKGELG	5
Q14781	390	PAPGKGTGS	5
O00257	23	KRIRKGRVE	5
O00257	114	GAQGKGQGH	5
O00257	223	GAPGKGSEK	5
O00257	256	IVKNKNKNG	5
O00257	312	RTFKKAAGA	5
O00257	319	GAEEKKVEA	5
O00257	411	SHVRKRCLS	5
O00257	425	REPCKKRLT	5
Q9Y3E7	45	EEKVKRSVK	5
Q9Y3E7	53	KDAAKKGQK	5
Q9Y3E7	72	IRSRKAVSK	5
Q9Y3E7	81	LYASKAHMN	5
Q9Y3E7	106	GSLQKSTEV	5
Q9Y3E7	136	KEMMKAGII	5
Q96FZ7	35	RQYQKRIAQ	5
Q96FZ7	99	QIEMKVMEG	5
Q96FZ7	113	ECLNKMHQV	5
P33316	84	GELPKAGGS	5
P33316	179	GLAAKHFID	5
Q5VYK3	56	EGVRKKVME	5
Q5VYK3	70	NKRIKSRPK	5
Q5VYK3	114	LPVEKQCEL	5
Q5VYK3	166	NLAEKPKTV	5
Q5VYK3	227	FYAAKRVIG	5
Q5VYK3	287	ELKSKQSLI	5
Q5VYK3	392	EIKIKPLGP	5
Q5VYK3	547	GRNRKESTS	5
Q5VYK3	567	YIQEKASHR	5
Q5VYK3	699	TEWIKSLMN	5
Q5VYK3	766	RYLAKKKMR	5
Q5VYK3	768	LAKKKMRMS	5
Q5VYK3	856	KETNKMKER	5
Q5VYK3	1007	DVASKGLGL	5
Q5VYK3	1056	GALGKTPDG	5
Q5VYK3	1153	LVTDKSMVD	5
Q5VYK3	1229	ELALKTLSK	5
Q5VYK3	1237	KVCVKMCDP	5
Q5VYK3	1243	CDPAKGAAG	5
Q5VYK3	1280	NTLVKISKS	5
Q5VYK3	1324	TEQEKAAMD	5
Q5VYK3	1418	SVIQKSCAF	5
Q5VYK3	1442	KLLQKLNGW	5
Q5VYK3	1769	LETCKSITY	5
Q5VYK3	1833	ELQEKAALL	5
Q15056	76	LVRDKDTDK	5
Q15056	120	AEGRKQDKG	5
O00321	51	ETCWKGTSS	5
O00321	287	ERKRKPGMN	5
O00321	310	DIVRKSGGR	5
P22102	44	ACSEKISNT	5
P22102	111	KRFAKEFMD	5
P22102	148	ALVVKASGL	5
P22102	156	LAAGKGVIV	5
P22102	251	LLKIKDTVL	5
P22102	342	VMASKGYPG	5
P22102	404	LEEAKKGLA	5
P22102	405	EEAKKGLAA	5
P22102	459	QPLAKATSR	5
P22102	557	AGIAKACGK	5
P22102	982	LAEHKIFPA	5
P22102	1003	GENGKICWV	5
Q13630	121	IFPDKTTYP	5
Q13630	306	KQAVKETCA	5
P68431	5	MARTKQTAR	5
P68431	19	KAPRKQLAT	5
P68431	24	QLATKAARK	5
Q16665	10	GANDKKKIS	5
Q16665	21	RRKEKSRDA	5
Q16665	56	SHLDKASVM	5
Q16665	85	EDDMKAQMN	5
Q16665	172	FLRMKCTLT	5
Q16665	636	MEDIKILIA	5
Q16665	674	NRAGKGVIE	5
Q16665	682	EQTEKSHPR	5
Q16665	721	QRKRKMEHD	5
Q16665	759	VKGCKSSEQ	5
Q16665	769	GMEQKTIIL	5
Q7Z6Z7	9	RTKLKKTPT	5
Q7Z6Z7	42	LQQIKTWNI	5
Q7Z6Z7	155	LGSDKRTPL	5
Q7Z6Z7	214	VKIEKRTTS	5
Q7Z6Z7	324	LMEIKAASL	5
Q7Z6Z7	417	LKVIKFLGD	5
Q7Z6Z7	988	TQGGKRSDG	5
Q7Z6Z7	1072	GLLVKLCVG	5
Q7Z6Z7	1208	MLVEKMVNP	5
Q7Z6Z7	1225	SLPAKLPGG	5
Q7Z6Z7	1263	RKPLKVYGG	5
Q7Z6Z7	1409	EEERKAREK	5
Q7Z6Z7	1413	KAREKQEEE	5
Q7Z6Z7	1420	EEEAKCLEK	5
Q7Z6Z7	1572	LQAAKEQKE	5
Q7Z6Z7	1693	NKNSKNSNG	5
Q7Z6Z7	1702	QELEKTLEE	5
Q7Z6Z7	1713	EMDIKRKEN	5
Q7Z6Z7	1718	RKENKGNDT	5
Q7Z6Z7	1917	NLRIKGPNA	5
Q7Z6Z7	2058	EGKQKGKGS	5
Q7Z6Z7	2060	KQKGKGSKP	5
Q7Z6Z7	2126	NAEDKDTPA	5
Q7Z6Z7	2692	ERREKRRKQ	5
Q7Z6Z7	2695	EKRRKQLAE	5
Q7Z6Z7	2703	EEETKITDK	5
Q7Z6Z7	2707	KITDKGKED	5
Q7Z6Z7	2725	CTASKSNDS	5
Q7Z6Z7	3253	EEKGKKSSK	5
Q7Z6Z7	3254	EKGKKSSKS	5
Q7Z6Z7	3278	KMESKSSNQ	5
Q7Z6Z7	3314	KHTEKHASG	5
Q7Z6Z7	3403	NVSRKGKNS	5
Q7Z6Z7	3558	KSPAKVSDG	5
Q7Z6Z7	3636	YTLCKQIGT	5
Q7Z6Z7	3697	VASQKRPLG	5
Q7Z6Z7	3716	MLTSKTSTQ	5
Q7Z6Z7	4037	ELHRKSPEE	5
Q7Z6Z7	4116	RIVAKAVYD	5
Q7Z6Z7	4221	GAIRKQLAA	5
Q8IU81	247	NVRFKKDHG	5
Q8IU81	382	PRRRKASPE	5
Q8IU81	438	GHSPKDPGG	5
O15054	191	NYGAKRGGP	5
O15054	295	GPERKGSAP	5
O15054	769	QEEEKKPPP	5
O15054	815	LEGQKYCYR	5
O15054	1006	RAKAKAKVP	5
O15054	1109	IRLIKVESG	5
O15054	1296	LQEEKESED	5
O15054	1381	QLYMKVPGS	5
O15054	1545	LQSMKHCQV	5
Q969V6	202	IPTAKSTPT	5
Q969V6	209	PTLIKQSQP	5
Q969V6	532	QEKDKQIEA	5
Q969V6	544	MLRQKQQLV	5
Q969V6	559	LEQEKRAQQ	5
Q9ULH7	75	HEQIKSLER	5
Q9ULH7	280	KHRSKKCKD	5
Q9ULH7	568	QEKEKQIEE	5
Q9ULH7	595	LEVEKRGQQ	5
Q9ULH7	665	LVAKKAVVI	5
Q9ULH7	844	NTPNKPSSP	5
P01106	275	QAPGKRSES	5
P01106	341	SNNRKCTSP	5
P01106	371	RNELKRSFF	5
P01106	389	ENNEKAPKV	5
Q8IZQ8	239	HAAVKSKSL	5
Q8IZQ8	251	KNRHKKPKD	5
Q8IZQ8	524	MLVEKQKVI	5
Q8IZQ8	551	MQLQKQKRN	5
Q8IZQ8	553	LQKQKRNNC	5
Q8IZQ8	560	NCSEKKPLP	5
Q8IZQ8	728	EDAVKQQMT	5
P61218	50	QANQKRITT	5
P61218	95	LIAMKELKA	5
P36873	111	LLAYKIKYP	5
P36873	168	IVDEKIFCC	5
P36873	301	KPAEKKKPN	5
O14744	35	GAVAKQGFD	5
O14744	60	QEPAKNRPG	5
O14744	227	GEPIKAAIL	5
O14744	302	ELFAKGYED	5
Q6ZTQ3	119	FTSMKSSDV	5
Q6ZTQ3	197	RKRMKPLMM	5
Q6ZTQ3	248	EEVIKQLLQ	5
Q6ZTQ3	278	QRRLKKTDI	5
Q6ZTQ3	336	NEEEKREIQ	5
Q6ZTQ3	364	KLVIKTETT	5
O43353	72	EILHKARFS	5
O43353	110	LLHRKTEYP	5
O43353	410	FCDHKTTPC	5
Q9Y224	36	LEDQKIRHY	5
P42226	107	LQGEKKAVM	5
P42226	153	EALQKGAEA	5
P42226	319	MVTEKQARE	5
P42226	423	DNNAKATIL	5
P42226	480	FLAQKIFND	5
P42226	647	PATIKMTVE	5
Q15170	136	LEEMKRVRN	5
Q15170	150	HWKAKRSRP	5
Q07912	71	KALCKRKSW	5
Q07912	100	STFRKTSPA	5
Q07912	131	RLLEKLGDG	5
Q07912	342	QILHKIDKE	5
Q69YN4	505	LNAFKALDS	5
Q69YN4	528	RQNEKSGYQ	5
Q69YN4	567	LSEIKRLGD	5
Q69YN4	880	LKLCKADEN	5
Q69YN4	1078	GVNEKLTIS	5
Q69YN4	1239	HKACKLAIL	5
Q69YN4	1613	IEPAKRAHV	5
P37231	160	CEGCKGFFR	5
P37231	197	CRFQKCLAV	5
P37231	260	LTKAKARAI	5
P37231	268	ILTGKTTDK	5
P37231	272	KTTDKSPFV	5
P37231	329	TEYAKSIPG	5
Q9UBK2	79	NIFEKIDEE	5
Q9UBK2	240	CTSKKKSHT	5
Q9UBK2	254	HLQAKPTTL	5
Q9UBK2	372	HEERKTKRP	5
Q9UBK2	442	LEASKQVSP	5
Q9UBK2	480	DEADKTGEL	5
Q9UBK2	656	REYEKRESE	5
Q9UBK2	671	RQRQKAIEE	5
P50549	25	NCNEKPTNV	5
P50549	110	EQPFKFSYG	5
P50549	296	CMFEKGPRQ	5
P50549	388	MNYDKLSRS	5
P50549	404	GIMQKVAGE	5
P35222	233	LAIFKSGGI	5
P35222	270	QEGAKMAVR	5
P35222	394	DAATKQEGM	5
P35222	508	WPLIKATVG	5
P51532	94	YNQMKGMGM	5
P51532	188	IMAYKMLAR	5
P51532	348	PLHQKQSRI	5
P51532	440	AKAYKRSKR	5
P51532	458	EKLEKQQKI	5
P51532	461	EKQQKIEQE	5
P51532	467	EQERKRRQK	5
P51532	499	GKIQKLTKA	5
P51532	516	EREQKKENE	5
P51532	524	ERIEKERMR	5
P51532	545	LIDQKKDKR	5
P51532	548	QKKDKRLAY	5
P51532	711	IENAKQDVD	5
P51532	835	KVSYKGSPA	5
P51532	872	HILAKIRWK	5
P51532	892	NHHCKLTQV	5
P51532	997	EYVIKCDMS	5
P51532	1014	HMQAKGVLL	5
P51532	1026	SEKDKKGKG	5
P51532	1219	LAAAKYKLN	5
P51532	1237	MFDQKSSSH	5
P51532	1441	SKKQKKRGR	5
P51532	1604	GRKEKAQDR	5
Q09472	386	CQSGKSCQV	5
Q09472	423	NAGDKRNQQ	5
Q09472	647	ELEEKRRTR	5
Q09472	654	TRLQKQNML	5
Q09472	970	AIAEKQPSQ	5
Q09472	981	KMEAKMEVD	5
Q09472	1134	LYNRKTSRV	5
Q09472	1253	ECGRKMHQI	5
Q09472	1287	RKENKFSAK	5
Q09472	1331	HASDKTVEV	5
Q09472	1426	LEYVKKLGY	5
Q09472	1473	KMLDKAVSE	5
Q09472	1528	EEERKREEN	5
Q09472	1550	KNAKKKNNK	5
Q09472	1555	KNNKKTSKN	5
Q09472	1568	SRGNKKKPG	5
Q09472	1704	NHDHKMEKL	5
Q09472	1707	HKMEKLGLG	5
Q09472	1762	CQKMKRVVQ	5
Q09472	1800	CQENKCPVP	5
Q09472	1810	CLNIKQKLR	5
Q09472	2091	QRAAKYANS	5
P04637	164	MAIYKQSQH	5
P04637	291	ENLRKKGEP	5
P04637	357	AQAGKEPGG	5
P04637	386	KLMFKTEGP	5
Q9UNE7	7	GKEEKEGGA	5
Q9UNE7	143	LRIAKKKRW	5
Q9UNE7	144	RIAKKKRWN	5
Q9UNE7	221	QVDEKRKKR	5
Q9UNE7	287	NLAMKEVID	5
Q9P1T7	95	EEIGKIKNG	5
Q9P1T7	134	KMHRKIQSS	5
O94953	90	YNIQKKAMT	5
O94953	242	FLRHKMTLI	5
O94953	315	KDMVKISMD	5
O94953	376	RSHRKRSQP	5
O94953	456	SERKKKSFG	5
O94953	457	ERKKKSFGL	5
O94953	557	HFAQKGPTW	5
O94953	588	RMETKARAG	5
O94953	762	IACGKCCLQ	5
O94953	861	KRMKKVSGA	5
O94953	1056	GEEAKAAKR	5
O94953	1059	AKAAKRPRV	5
P55317	264	LRRQKRFKC	5
P55317	270	FKCEKQPGA	5
P14859	293	EQFAKTFKQ	5
P14859	382	RRRKKRTSI	5
P14859	403	LENQKPTSE	5
P14859	435	RQKEKRINP	5
Q99814	5	MTADKEKKR	5
Q99814	18	RRKEKSRDA	5
Q99814	53	SHLDKASIM	5
Q99814	93	NLYLKALEG	5
Q99814	173	FMRMKCTVT	5
Q99814	312	RMLAKHGGY	5
Q99814	595	QLESKKTEP	5
Q99814	685	TRSAKGFGA	5
Q99814	818	SSAHKVSGM	5
Q9HAZ2	103	WAKRKMEAG	5
Q9HAZ2	146	GCITKISED	5
Q9HAZ2	249	LRRHKKYTC	5
Q9HAZ2	250	RRHKKYTCG	5
Q9HAZ2	401	EVCHKSYTQ	5
Q9HAZ2	413	LCRHKRMHA	5
Q9HAZ2	424	RTQIKCKDC	5
Q9HAZ2	702	SIAEKYFGP	5
Q9HAZ2	857	LHYAKPSPF	5
Q9HAZ2	1114	LASEKQEDV	5
O14497	51	RGEMKAAAG	5
O14497	893	GMNRKTQET	5
O14497	1007	TTNEKITKL	5
O14497	1034	FTEEKAMGM	5
O14497	1238	GSMRKAPGS	5
O14497	1370	QQNYKRPMD	5
O14497	1382	GPPAKRHEG	5
O14497	1615	MKMQKAGPP	5
O14497	1662	RLTMKDIGT	5
O14497	1928	EDGAKSSEA	5
O14497	1934	SEAIKESSK	5
O14497	1953	HRNIKILED	5
Q92925	139	LKRRKMADK	5
Q92925	143	KMADKVLPQ	5
Q92925	176	TIARKRMEI	5
Q92925	248	KQKRKFSSF	5
Q92925	262	IELDKELYG	5
Q92925	376	EIPMKLAGL	5
Q92925	401	PNDQKKTAC	5
P17252	23	RFARKGALR	5
P17252	76	FVVHKRCHE	5
P17252	131	HQGMKCDTC	5
P17252	368	LYAIKILKK	5
P22694	9	ATAKKGSEV	5
P22694	47	DFERKKTLG	5
P22694	77	KILDKQKVV	5
P22694	346	EKCAKEFGE	5
P22612	7	NAPAKKDTE	5
P22612	22	EFLAKARGD	5
P22612	73	HYAMKILNK	5
P22612	77	KILNKQKVV	5
P22612	93	ILNEKRILQ	5
P10644	63	KEEAKQIQN	5
P10644	70	QNLQKAGTR	5
P10644	242	STLRKRKMY	5
P10644	244	LRKRKMYEE	5
P13861	135	QEACKDILL	5
P13861	247	KNNAKKRKM	5
P13861	391	EQLVKMFGS	5
P31321	70	LARQKSNSQ	5
P31321	242	STLRKRKMY	5
P31321	244	LRKRKMYEE	5
P31323	150	QEACKDILL	5
P31323	262	KNNAKKRKM	5
P31323	393	MEIMKRNIA	5
O60674	217	CIRAKIQDY	5
O60674	227	ILTRKRIRY	5
O60674	346	VTIHKQDGK	5
O60674	539	MVFHKIRNE	5
O60674	558	GTFTKIFKG	5
O60674	585	KVLDKAHRN	5
O60674	642	LKKNKNCIN	5
O60674	655	LEVAKQLAW	5
O60674	688	EEDRKTGNP	5
O60674	857	QQLGKGNFG	5
P40763	87	LRRIKQFLQ	5
P40763	140	VVTEKQQML	5
P40763	282	RQQIKKLEE	5
P40763	290	ELQQKVSYK	5
P40763	318	RNLMKSAFV	5
P40763	365	QLKIKVCID	5
P40763	370	VCIDKDSGD	5
P40763	531	TLAEKLLGP	5
P40763	548	ITWAKFCKE	5
P40763	557	NMAGKGFSF	5
P52597	72	KMALKKDRE	5
P52597	185	IEVFKSSQE	5
P52597	299	GLPYKATEN	5
P05412	35	PKILKQSMT	5
P05412	56	HLRAKNSDL	5
P05412	254	QERIKAERK	5
P05412	258	KAERKRMRN	5
P05412	268	IAASKCRKR	5
P62736	52	GMGQKDSYV	5
P62736	120	ANREKMTQI	5
P47756	53	IARDKVVGK	5
P47756	135	VILIKKAGD	5
P47756	136	ILIKKAGDG	5
P47756	145	SKKIKGCWD	5
Q16633	5	MLWQKPTAP	5
Q16633	35	LLRRKRGHA	5
P08151	143	MNHQKGPSP	5
P08151	226	EREEKREPE	5
P08151	329	HTGEKPYMC	5
P08151	384	RKHVKTVHG	5
O75582	43	GHAEKVGIE	5
O75582	85	KVLKKATIV	5
O75582	93	VQKAKTTEH	5
O75582	299	MKDPKKRLG	5
O75582	329	DLAAKKVPA	5
O75582	562	NLEIKIIDF	5
O75582	640	EIMKKIKKG	5
O75582	642	MKKIKKGDF	5
O75582	716	HTCVKATFH	5
O75582	737	QNVDKAPLA	5
O75582	748	RKMKKTSTS	5
P42224	85	HNIRKSKRN	5
P42224	114	KEERKILEN	5
P42224	161	EHEIKSLED	5
P42224	209	MLDNKRKEV	5
P42224	216	EVVHKIIEL	5
P42224	286	ELEQKYTYE	5
P42224	298	ITKNKQVLW	5
P42224	413	LKEQKNAGT	5
P42224	525	MLGEKLLGP	5
P42224	566	LELIKKHLL	5
P42224	697	LDGPKGTGY	5
P55072	81	CSDEKIRMN	5
P55072	190	GEPIKREDE	5
P55072	295	EEAEKNAPA	5
P55072	315	PKREKTHGE	5
P55072	425	QAIRKKMDL	5
P55072	565	EIFDKARQA	5
P55072	584	DSIAKARGG	5
P55072	696	QRACKLAIR	5
P49368	44	CLGPKSMMK	5
P49368	78	HPAAKSMIE	5
P49368	196	EIDIKKYAR	5
P49368	317	RRVRKTDNN	5
P49368	370	CKDPKACTI	5
P49368	491	LVDMKELGI	5
P51114	128	NTFFKCTVD	5
P51114	148	ENAHKDFKK	5
P51114	151	HKDFKKAVG	5
P51114	310	EIVDKSGVV	5
P51114	578	GPSEKAING	5
P03372	8	TLHTKASGM	5
P03372	180	MESAKETRY	5
P03372	206	CEGCKAFFK	5
P03372	210	KAFFKRSIQ	5
P03372	244	CRLRKCYEV	5
P03372	268	MLKHKRQRD	5
P03372	299	PLMIKRSKK	5
P03372	416	RNQGKCVEG	5
P03372	492	HLMAKAGLT	5
P03372	520	HMSNKGMEH	5
Q03164	209	KSGDKIKKK	4
Q03164	211	GDKIKKKDS	4
Q03164	213	KIKKKDSKS	4
Q03164	216	KKDSKSIEK	4
Q03164	271	ATKIKKLRA	4
Q03164	329	EKPQKVRKD	4
Q03164	345	TKEDKTVVR	4
Q03164	365	IPSSKRTDA	4
Q03164	373	ATIAKQLLQ	4
Q03164	386	GAQKKIEKE	4
Q03164	389	KKIEKEAAQ	4
Q03164	398	LQGRKVKTQ	4
Q03164	400	GRKVKTQVK	4
Q03164	423	SRIIKTPRR	4
Q03164	545	RTTKKLSTL	4
Q03164	609	QGKRKSILR	4
Q03164	645	GLIRKPIFD	4
Q03164	692	FDMHKRSPL	4
Q03164	739	KRKRKVFSP	4
Q03164	812	ESAEKNQRP	4
Q03164	872	VEKDKSRER	4
Q03164	882	REREKENKR	4
Q03164	890	RESRKEKRK	4
Q03164	928	SSSAKKATG	4
Q03164	957	TTAVKTKIL	4
Q03164	1021	PMTDKRVAS	4
Q03164	1036	AQLCKIEKS	4
Q03164	1041	IEKSKSLKQ	4
Q03164	1044	SKSLKQTDQ	4
Q03164	1082	ALGRKRAVF	4
Q03164	1133	IKPIKPVTR	4
Q03164	1139	VTRNKAPQE	4
Q03164	1214	AKAVKKKEK	4
Q03164	1215	KAVKKKEKK	4
Q03164	1219	KKEKKSKTS	4
Q03164	1229	KKDSKESSV	4
Q03164	1255	DPAPKKSSS	4
Q03164	1256	PAPKKSSSE	4
Q03164	1296	RKSSKQVSQ	4
Q03164	1345	QSKQKKVAP	4
Q03164	1364	KEKEKPPPV	4
Q03164	1390	GNSSKQKIP	4
Q03164	1457	EPFHKFCLE	4
Q03164	1574	PLCDKCYDD	4
Q03164	1590	MQCGKCDRW	4
Q03164	1638	LALEKELQI	4
Q03164	1645	QISLKQVLT	4
Q03164	1748	QPEIKKANS	4
Q03164	1781	WEPNKVSSN	4
Q03164	1828	IPAPKPKGP	4
Q03164	1962	CSRAKNCVF	4
Q03164	1970	FLDDKKVYC	4
Q03164	1982	RDLIKGEVV	4
Q03164	2009	SLRRKFLNG	4
Q03164	2276	TVGNKNSHL	4
Q03164	2289	SSEMKQSSA	4
Q03164	2299	DLVSKSSSL	4
Q03164	2347	LNVSKIGSF	4
Q03164	2403	VKTLKLSGM	4
Q03164	2428	DRRQKGKKS	4
Q03164	2444	KHSSKSFLE	4
Q03164	2521	KRTVKVTLT	4
Q03164	2528	LTPLKMENE	4
Q03164	2713	CDLPKISQL	4
Q03164	2742	SQIPKRNGK	4
Q03164	2746	KRNGKENGT	4
Q03164	2779	KNEPKMDNC	4
Q03164	2889	SNREKDMGL	4
Q03164	2965	TITEKSVAS	4
Q03164	3045	IQNQKYVPN	4
Q03164	3230	LQTRKNKKL	4
Q03164	3232	TRKNKKLAP	4
Q03164	3663	SITEKKPKK	4
Q03164	3664	ITEKKPKKG	4
Q03164	3666	EKKPKKGLV	4
Q03164	3667	KKPKKGLVF	4
Q03164	3691	EDAWKSLTD	4
Q03164	3707	NARLKQLSF	4
Q03164	3738	LSGAKHCRN	4
Q03164	3772	VHLRKSAFD	4
Q03164	3804	EVQLKSARR	4
Q03164	3824	FRHLKKTSK	4
Q03164	3828	KKTSKEAVG	4
Q03164	3963	CGAKKCRKF	4
Q9Y4C1	62	KKDLKVCVE	4
Q9Y4C1	74	ESWRKRRWI	4
Q9Y4C1	219	NPASKTLQV	4
Q9Y4C1	232	IPALKIVDP	4
Q9Y4C1	261	IGAVKRKSS	4
Q9Y4C1	353	CLNTKSEAL	4
Q9Y4C1	394	CTQPKTNTD	4
Q9Y4C1	425	KASSKAELE	4
Q9Y4C1	470	NCSGKKVEP	4
Q9Y4C1	503	RSNNKIQNA	4
Q9Y4C1	558	LRKDKEQQK	4
Q9Y4C1	580	LQFNKHGVL	4
Q9Y4C1	594	LTPNKYDNE	4
Q9Y4C1	637	VISEKEAMS	4
Q9Y4C1	691	CYRMKRKNC	4
Q9Y4C1	711	LKCVKSQIH	4
Q9Y4C1	729	IIPGKALYD	4
Q9Y4C1	748	KWGIKANCP	4
Q9Y4C1	834	GNVNKENKE	4
Q9Y4C1	837	NKENKEKQP	4
Q9Y4C1	901	ENGLKNTPK	4
Q9Y4C1	905	KNTPKILDD	4
Q9Y4C1	971	RECWKQGQP	4
Q9Y4C1	984	GVHHKLNSE	4
Q9Y4C1	997	ESFRKEFGE	4
Q9Y4C1	1148	EEVLKTIQD	4
Q9Y4C1	1184	KDTEKIREF	4
Q9Y4C1	1190	REFLKKVSE	4
Q9Y4C1	1220	RSLRKRLHQ	4
Q9Y4C1	1293	NHEDKLQVK	4
Q9Y4C1	1312	VAMLKASES	4
Q9Y2Z0	36	EELTKALEQ	4
Q9Y2Z0	85	AMLRKGICE	4
Q9Y2Z0	194	KNVQKNDVN	4
Q9Y2Z0	245	KIEIKLKKP	4
Q9Y2Z0	247	EIKLKKPEA	4
Q9Y2Z0	256	VRWEKLEGQ	4
Q9Y2Z0	299	KEEEKNEKL	4
Q12931	95	QAETKKLLD	4
Q12931	130	KLRHKLVSD	4
Q12931	252	RTGTKIIIH	4
Q12931	258	IIHLKSDCK	4
Q12931	324	QAHDKPRYT	4
Q12931	349	VPDMKPSMF	4
Q12931	424	QRLIKFFID	4
Q12931	436	KDAEKYAKF	4
Q12931	439	EKYAKFFED	4
Q12931	519	EAMKKKDTE	4
Q12931	699	ELLVKALER	4
P07900	58	DALDKIRYE	4
P07900	116	KSGTKAFME	4
P07900	204	ERRIKEIVK	4
P07900	208	KEIVKKHSQ	4
P07900	209	EIVKKHSQF	4
P07900	228	KERDKEVSD	4
P07900	238	EAEEKEDKE	4
P07900	241	EKEDKEEEK	4
P07900	245	KEEEKEKEE	4
P07900	247	EEKEKEEKE	4
P07900	274	KDGDKKKKK	4
P07900	278	KKKKKKIKE	4
P07900	279	KKKKKIKEK	4
P07900	281	KKKIKEKYI	4
P07900	283	KIKEKYIDQ	4
P07900	314	GEFYKSLTN	4
P07900	327	HLAVKHFSV	4
P07900	356	FENRKKKNN	4
P07900	357	ENRKKKNNI	4
P07900	362	KNNIKLYVR	4
P07900	407	LQQSKILKV	4
P07900	414	KVIRKNLVK	4
P07900	419	NLVKKCLEL	4
P07900	431	LAEDKENYK	4
P07900	435	KENYKKFYE	4
P07900	457	SQNRKKLSE	4
P07900	458	QNRKKLSEL	4
P07900	485	CTRMKENQK	4
P07900	489	KENQKHIYY	4
P07900	513	ERLRKHGLE	4
P07900	558	DEEEKKKQE	4
P07900	559	EEEKKKQEE	4
P07900	560	EEKKKQEEK	4
P07900	565	QEEKKTKFE	4
P07900	576	CKIMKDILE	4
P07900	581	DILEKKVEK	4
P07900	585	KKVEKVVVS	4
P07900	632	MAAKKHLEI	4
P07900	649	TLRQKAEAD	4
P07900	654	AEADKNDKS	4
P07900	657	DKNDKSVKD	4
P07900	693	YRMIKLGLG	4
P08238	53	DALDKIRYE	4
P08238	72	GKELKIDII	4
P08238	111	KSGTKAFME	4
P08238	203	KEVVKKHSQ	4
P08238	204	EVVKKHSQF	4
P08238	223	KEREKEISD	4
P08238	234	AEEEKGEKE	4
P08238	237	EKGEKEEED	4
P08238	242	EEEDKDDEE	4
P08238	249	EEKPKIEDV	4
P08238	266	GKDKKKKTK	4
P08238	267	KDKKKKTKK	4
P08238	270	KKKTKKIKE	4
P08238	271	KKTKKIKEK	4
P08238	275	KIKEKYIDQ	4
P08238	306	GEFYKSLTN	4
P08238	319	HLAVKHFSV	4
P08238	347	LFENKKKKN	4
P08238	349	ENKKKKNNI	4
P08238	354	KNNIKLYVR	4
P08238	399	LQQSKILKV	4
P08238	406	KVIRKNIVK	4
P08238	411	NIVKKCLEL	4
P08238	423	LAEDKENYK	4
P08238	427	KENYKKFYE	4
P08238	551	EEEKKKMEE	4
P08238	552	EEKKKMEES	4
P08238	557	MEESKAKFE	4
P08238	565	ENLCKLMKE	4
P08238	568	CKLMKEILD	4
P08238	623	YMMAKKHLE	4
P08238	624	MMAKKHLEI	4
P08238	641	TLRQKAEAD	4
P08238	646	AEADKNDKA	4
P08238	649	DKNDKAVKD	4
P08238	685	YRMIKLGLG	4
P0DMV8	56	GDAAKNQVA	4
P0DMV8	71	VFDAKRLIG	4
P0DMV8	77	LIGRKFGDP	4
P0DMV8	108	QVSYKGETK	4
P0DMV8	126	MVLTKMKEI	4
P0DMV8	128	LTKMKEIAE	4
P0DMV8	257	ISQNKRAVR	4
P0DMV8	319	EPVEKALRD	4
P0DMV8	325	LRDAKLDKA	4
P0DMV8	328	AKLDKAQIH	4
P0DMV8	361	RDLNKSINP	4
P0DMV8	415	TALIKRNST	4
P0DMV8	423	TIPTKQTQI	4
P0DMV8	539	RVSAKNALE	4
P0DMV8	568	EADKKKVLD	4
P0DMV8	589	TLAEKDEFE	4
P0DMV8	595	EFEHKRKEL	4
P0DMV8	597	EHKRKELEQ	4
P0DMV8	628	AQGPKGGSG	4
P0DMV9	56	GDAAKNQVA	4
P0DMV9	71	VFDAKRLIG	4
P0DMV9	77	LIGRKFGDP	4
P0DMV9	108	QVSYKGETK	4
P0DMV9	126	MVLTKMKEI	4
P0DMV9	128	LTKMKEIAE	4
P0DMV9	257	ISQNKRAVR	4
P0DMV9	319	EPVEKALRD	4
P0DMV9	325	LRDAKLDKA	4
P0DMV9	328	AKLDKAQIH	4
P0DMV9	361	RDLNKSINP	4
P0DMV9	415	TALIKRNST	4
P0DMV9	423	TIPTKQTQI	4
P0DMV9	539	RVSAKNALE	4
P0DMV9	568	EADKKKVLD	4
P0DMV9	589	TLAEKDEFE	4
P0DMV9	595	EFEHKRKEL	4
P0DMV9	597	EHKRKELEQ	4
P0DMV9	628	AQGPKGGSG	4
P12004	20	LEALKDLIN	4
P12004	80	SKILKCAGN	4
P12004	110	PNQEKVSDY	4
P12004	138	SCVVKMPSG	4
P12004	181	NGNIKLSQT	4
P12004	217	NFFTKATPL	4
P12004	254	YLAPKIEDE	4
P11142	56	GDAAKNQVA	4
P11142	71	VFDAKRLIG	4
P11142	108	QVEYKGETK	4
P11142	126	MVLTKMKEI	4
P11142	128	LTKMKEIAE	4
P11142	187	YGLDKKVGA	4
P11142	246	IAEFKRKHK	4
P11142	257	ISENKRAVR	4
P11142	325	LRDAKLDKS	4
P11142	328	AKLDKSQIH	4
P11142	384	LSGDKSENV	4
P11142	415	TVLIKRNTT	4
P11142	423	TIPTKQTQT	4
P11142	531	AEDEKQRDK	4
P11142	539	KVSSKNSLE	4
P11142	550	AFNMKATVE	4
P11142	557	VEDEKLQGK	4
P11142	561	KLQGKINDE	4
P11142	567	NDEDKQKIL	4
P11142	569	EDKQKILDK	4
P11142	597	EHQQKELEK	4
P62424	5	MPKGKKAKG	4
P62424	6	PKGKKAKGK	4
P62424	10	KAKGKKVAP	4
P62424	26	QEAKKVVNP	4
P62424	34	PLFEKRPKN	4
P62424	37	EKRPKNFGI	4
P62424	110	TKQEKKQRL	4
P62424	111	KQEKKQRLL	4
P62424	176	ALCRKMGVP	4
P62424	185	YCIIKGKAR	4
P62424	212	NSEDKGALA	4
P62424	217	GALAKLVEA	4
P62424	255	AKLEKAKAK	4
P62424	259	KAKAKELAT	4
P62424	264	ELATKLG	4
P15880	74	VKDMKIKSL	4
P15880	76	DMKIKSLEE	4
P15880	89	SLPIKESEI	4
P15880	125	RTRFKAFVA	4
P31689	23	QEELKKAYR	4
P31689	24	EELKKAYRK	4
P31689	28	KAYRKLALK	4
P31689	32	KLALKYHPD	4
P31689	44	NEGEKFKQI	4
P31689	46	GEKFKQISQ	4
P31689	59	LSDAKKREL	4
P31689	125	GATRKLALQ	4
P31689	130	LALQKNVIC	4
P31689	143	GRGGKKGAV	4
P31689	214	VHIDKGMKD	4
P31689	301	HGDIKCVLN	4
P31689	317	RPYEKGRLI	4
P31689	338	LSPDKLSLL	4
O95816	123	EVVNKFLDD	4
O95816	132	LGNAKSHLM	4
O95816	189	DKAIKLLEH	4
O95816	200	GAGSKTLQQ	4
O60884	25	ENELKKAYR	4
O60884	26	NELKKAYRK	4
O60884	30	KAYRKLAKE	4
O60884	33	RKLAKEYHP	4
O60884	46	NAGDKFKEI	4
O60884	62	SNPEKRELY	4
O60884	121	MHPLKVSLE	4
O60884	131	LYNGKTTKL	4
O60884	152	GQGGKSGAV	4
O60884	204	DRCKKCEGK	4
O60884	208	KCEGKKVIK	4
O60884	212	KKVIKEVKI	4
O60884	215	IKEVKILEV	4
O60884	223	VHVDKGMKH	4
O60884	255	LLQEKEHEV	4
O60884	272	HMTYKIGLV	4
O60884	297	QIVVKYPPG	4
O60884	326	NPFEKGDLY	4
P62701	10	KKHLKRVAA	4
P62701	16	VAAPKHWML	4
P62701	94	ISIDKTGEN	4
P62701	122	EAKYKLCKV	4
P62701	233	GKGNKPWIS	4
Q99598	12	GGFRKRKHD	4
Q99598	58	ERLVKLSRD	4
Q99598	68	TVESKRTIF	4
Q99598	93	ESEIKLDGV	4
Q99598	150	DEINKQLIF	4
Q99598	247	LYTLKQSLA	4
Q99598	261	CYALKVRGS	4
P68032	63	EAQSKRGIL	4
P68032	217	DIKEKLCYV	4
P68032	286	NSIMKCDID	4
P68032	330	TMKIKIIAP	4
P10275	17	RPPSKTYRG	4
P10275	143	VAASKGLPQ	4
P10275	301	DSAGKSTED	4
P10275	318	GGYTKGLEG	4
P10275	388	HARIKLENP	4
P10275	558	FPPQKTCLI	4
P10275	585	KVFFKRAAE	4
P10275	606	CTIDKFRRK	4
P10275	610	KFRRKNCPS	4
P10275	631	LGARKLKKL	4
P10275	633	ARKLKKLGN	4
P10275	809	FLCMKALLL	4
P10275	826	LKNQKFFDE	4
P10275	837	MNYIKELDR	4
P10275	906	VQVPKILSG	4
Q8N6H7	7	AEPNKTEIQ	4
Q8N6H7	15	QTLFKRLRA	4
Q8N6H7	24	VPTNKACFD	4
Q8N6H7	117	MYREKIRQL	4
Q8N6H7	149	HSPEKKDSD	4
Q8N6H7	209	SLELKSSII	4
Q8N6H7	216	IIGKKKPAA	4
Q8N6H7	263	AADAKKQAE	4
Q8N6H7	298	NLEGKKREQ	4
Q8N6H7	299	LEGKKREQA	4
Q8N6H7	387	RVEEKEPEV	4
Q8N6H7	429	FAGAKAISS	4
Q8N6H7	493	IAQFKQGVK	4
Q8N6H7	502	SVAGKMAVL	4
P56211	33	EAKLKARYP	4
P56211	58	QKGQKYFDS	4
P56211	73	KAKMKNKQL	4
P56211	84	AAPDKTEVT	4
P56211	102	LPQRKPSLV	4
P35226	51	LETSKYCPI	4
P35226	62	VQVHKTRPL	4
P35226	146	RLDRKVNKD	4
P35226	149	RKVNKDKEK	4
P35226	153	KDKEKSKEE	4
P35226	177	MHLRKFLRS	4
P35226	232	RPTCKRMKI	4
O60885	72	RVVLKTLWK	4
O60885	111	MGTIKKRLE	4
O60885	112	GTIKKRLEN	4
O60885	155	EALEKLFLQ	4
O60885	160	LFLQKINEL	4
O60885	283	PQPVKTKKG	4
O60885	289	KKGVKRKAD	4
O60885	349	EKSSKVSEQ	4
O60885	395	CDIIKHPMD	4
O60885	404	MSTIKSKLE	4
O60885	445	AMARKLQDV	4
O60885	519	QEQLKAVHE	4
O60885	537	QNKPKKKEK	4
O60885	538	NKPKKKEKD	4
O60885	541	KKKEKDKKE	4
O60885	546	DKKEKKKEK	4
O60885	547	KKEKKKEKH	4
O60885	550	KKKEKHKRK	4
O60885	554	KHKRKEEVE	4
O60885	562	EENKKSKAK	4
O60885	564	NKKSKAKEP	4
O60885	571	EPPPKKTKK	4
O60885	592	PAPMKSKPP	4
O60885	624	LDINKLPGE	4
O60885	677	SCLRKKRKP	4
O60885	678	CLRKKRKPQ	4
O60885	680	RKKRKPQAE	4
O60885	685	PQAEKVDVI	4
O60885	728	KSKKKGHPG	4
O60885	937	QQLQKVQPP	4
O60885	1050	PRHHKSDPY	4
O60885	1092	NVQPKKQEL	4
O60885	1114	VKEEKIHSP	4
O60885	1141	PESIKAPVH	4
O60885	1177	GAPDKDKQK	4
O60885	1181	KDKQKQEPK	4
O60885	1185	KQEPKTPVA	4
O60885	1191	PVAPKKDLK	4
O60885	1195	KKDLKIKNM	4
O60885	1197	DLKIKNMGS	4
O60885	1218	SSTAKSSSD	4
Q14781	20	CILSKRLRK	4
Q14781	65	KEHEKEVQN	4
Q14781	71	VQNRKRGKR	4
Q14781	131	DLDAKRGPR	4
Q14781	145	PVPQKKAQI	4
Q14781	153	ILVAKPELK	4
Q14781	162	DPIRKKRGR	4
Q14781	167	KRGRKPLPP	4
Q14781	174	PPEQKATRR	4
Q14781	310	SKIPKAPSG	4
Q14781	362	LQSVKNGMP	4
Q14781	379	ATATKGVPA	4
Q14781	432	RDCVKGSAT	4
O00257	18	ESIEKKRIR	4
O00257	71	MGYRKRGPK	4
O00257	106	DNRAKLDLG	4
O00257	125	ELNSKKHHQ	4
O00257	140	ERAGKPPPP	4
O00257	157	QLNSKKHHP	4
O00257	191	DLGAKSHPP	4
O00257	197	HPPDKWAQG	4
O00257	212	LGAVKPLAG	4
O00257	227	KGSEKGPPN	4
O00257	249	GIGGKMKIV	4
O00257	251	GGKMKIVKN	4
O00257	258	KNKNKNGRI	4
O00257	280	AVKIKSGEV	4
O00257	311	DRTFKKAAG	4
O00257	326	EAPPKRREE	4
O00257	479	LRCVKTRSE	4
O00257	517	TTAEKPPAE	4
Q9Y3E7	6	GLFGKTQEK	4
Q9Y3E7	10	KTQEKPPKE	4
Q9Y3E7	25	LKIRKEMRV	4
Q9Y3E7	43	REEEKVKRS	4
Q9Y3E7	54	DAAKKGQKD	4
Q9Y3E7	57	KKGQKDVCI	4
Q9Y3E7	65	IVLAKEMIR	4
Q9Y3E7	92	LMGMKNQLA	4
Q9Y3E7	112	TEVMKAMQS	4
Q9Y3E7	132	RELSKEMMK	4
Q9Y3E7	179	GALGKAPSK	4
Q9Y3E7	183	KAPSKVTDA	4
Q96FZ7	8	LFGRKKQSR	4
Q96FZ7	18	TEQDKAILQ	4
Q96FZ7	24	ILQLKQQRD	4
Q96FZ7	29	QQRDKLRQY	4
Q96FZ7	61	KERAKLLLK	4
Q96FZ7	65	KLLLKKKRY	4
Q96FZ7	66	LLLKKKRYQ	4
Q96FZ7	67	LLKKKRYQE	4
Q96FZ7	181	PLPEKIPEN	4
Q96FZ7	189	NVPVKARPR	4
P33316	155	KAVVKTDIQ	4
Q5VYK3	67	VHLNKRIKS	4
Q5VYK3	104	IIYVKMGYP	4
Q5VYK3	244	LEQCKLGIV	4
Q5VYK3	301	AIINKMYKV	4
Q5VYK3	304	NKMYKVYLG	4
Q5VYK3	313	DIPLKTKEG	4
Q5VYK3	336	RVKLKIVPH	4
Q5VYK3	390	CPEIKIKPL	4
Q5VYK3	450	EALCKEEPE	4
Q5VYK3	502	QVAVKFAST	4
Q5VYK3	573	SHRMKTPVK	4
Q5VYK3	577	KTPVKYMTG	4
Q5VYK3	690	KLATKFVDK	4
Q5VYK3	694	KFVDKTEWI	4
Q5VYK3	706	MNNSKEEMR	4
Q5VYK3	730	GNELKSMIE	4
Q5VYK3	767	YLAKKKMRM	4
Q5VYK3	892	SVEAKQIEL	4
Q5VYK3	972	SLVRKLSTH	4
Q5VYK3	980	HKEVKSHLK	4
Q5VYK3	1036	LMTGKRVKH	4
Q5VYK3	1099	WNSRKGAAF	4
Q5VYK3	1217	QDDIKESVR	4
Q5VYK3	1222	ESVRKAAEL	4
Q5VYK3	1233	KTLSKVCVK	4
Q5VYK3	1283	VKISKSAGA	4
Q5VYK3	1376	GLGTKGGCA	4
Q5VYK3	1456	EPIYKTSCA	4
Q5VYK3	1479	KNHAKEVLP	4
Q5VYK3	1500	EKSEKEECN	4
Q5VYK3	1534	TITQKALQS	4
Q5VYK3	1544	SWKMKAQGA	4
Q5VYK3	1556	ASIAKQTSS	4
Q5VYK3	1590	EELLKAIAC	4
Q5VYK3	1605	AELEKSVPN	4
Q5VYK3	1622	QAVLKECSK	4
Q5VYK3	1632	NVKYKIVAI	4
Q5VYK3	1647	LKATKEDRF	4
Q5VYK3	1663	IPLIKKNSL	4
Q5VYK3	1683	EENEKEKEL	4
Q5VYK3	1685	NEKEKELQL	4
Q5VYK3	1719	QELCKLMCE	4
Q5VYK3	1726	CERLKLSTW	4
Q5VYK3	1778	SLENKTYSS	4
Q5VYK3	1796	ELLLKKLEE	4
Q5VYK3	1802	LEESKQWEC	4
Q5VYK3	1838	AALLKKTLE	4
Q15056	80	KDTDKFKGF	4
Q15056	245	EVVQKEQE	4
O00321	27	LEGAKLGFC	4
O00321	285	WGERKRKPG	4
P22102	65	FCKEKKIEF	4
P22102	66	CKEKKIEFV	4
P22102	107	LESSKRFAK	4
P22102	162	VIVAKSKEE	4
P22102	219	AQDHKRLLE	4
P22102	375	GTALKNGKV	4
P22102	419	AIYRKDVGF	4
P22102	438	SLTYKESGV	4
P22102	452	NMLVKKIQP	4
P22102	453	MLVKKIQPL	4
P22102	467	RSGCKVDLG	4
P22102	480	LFDLKAAGF	4
P22102	501	GTKLKIAQL	4
P22102	508	QLCNKHDTI	4
P22102	561	KACGKAGCA	4
P22102	598	ERDQKLPHL	4
P22102	629	SLVRKIVAK	4
P22102	757	IQQHKEEAW	4
P22102	844	VISNKAAVA	4
P22102	923	LPSFKGSNA	4
Q13630	21	GLVGKAIQK	4
Q13630	25	KAIQKVVAD	4
Q13630	194	GLIHKVHLA	4
Q13630	253	EVSIKEAAE	4
Q13630	282	GQFKKTASN	4
P68431	65	LLIRKLPFQ	4
P68431	116	AIHAKRVTI	4
Q16665	12	NDKKKISSE	4
Q16665	71	LRVRKLLDA	4
Q16665	94	CFYLKALDG	4
Q16665	118	DNVNKYMGL	4
Q16665	157	GLVKKGKEQ	4
Q16665	185	TMNIKSATW	4
Q16665	213	QCGYKKPPM	4
Q16665	251	SLDMKFSYC	4
Q16665	370	SSDMKMTQL	4
Q16665	477	EVALKLEPN	4
Q16665	538	ELVEKLFAE	4
Q16665	629	KTVTKDRME	4
Q16665	649	THIHKETTS	4
Q16665	709	ELNPKILAL	4
Q16665	753	SLSWKRVKG	4
Q16665	756	WKRVKGCKS	4
Q7Z6Z7	90	REQLKMLLL	4
Q7Z6Z7	143	YVFSKRSNY	4
Q7Z6Z7	190	LHMMKYPPS	4
Q7Z6Z7	211	GAEVKIEKR	4
Q7Z6Z7	253	IPKDKQMLL	4
Q7Z6Z7	272	SNHRKRLQA	4
Q7Z6Z7	342	ERTPKLSSI	4
Q7Z6Z7	469	DLCRKECPF	4
Q7Z6Z7	516	LNFLKKAIQ	4
Q7Z6Z7	701	YICQKPSIQ	4
Q7Z6Z7	706	PSIQKADGT	4
Q7Z6Z7	775	LNVMKFVES	4
Q7Z6Z7	797	FVNQKGLLP	4
Q7Z6Z7	980	PKDEKAGTT	4
Q7Z6Z7	1037	KGKSKITPA	4
Q7Z6Z7	1047	AARIKQIKP	4
Q7Z6Z7	1050	IKQIKPLLS	4
Q7Z6Z7	1111	KLLTKGLSW	4
Q7Z6Z7	1156	LMLQKFLCS	4
Q7Z6Z7	1247	VVTQKAAFT	4
Q7Z6Z7	1293	ERLSKEKEG	4
Q7Z6Z7	1424	KCLEKFQDA	4
Q7Z6Z7	1497	DVLIKAALP	4
Q7Z6Z7	1559	NVLIKLLEV	4
Q7Z6Z7	1690	PRLNKNSKN	4
Q7Z6Z7	1715	DIKRKENKG	4
Q7Z6Z7	1733	TNTEKETSL	4
Q7Z6Z7	1741	LEETKIGEI	4
Q7Z6Z7	1790	TRDHKYAMM	4
Q7Z6Z7	1799	FAELKSTRM	4
Q7Z6Z7	1840	HTMEKVVRS	4
Q7Z6Z7	1926	VQLVKTTPL	4
Q7Z6Z7	2046	GKKDKEGDR	4
Q7Z6Z7	2056	SEEGKQKGK	4
Q7Z6Z7	2063	GKGSKPLMP	4
Q7Z6Z7	2157	VNEVKAALG	4
Q7Z6Z7	2203	SATAKTQHN	4
Q7Z6Z7	2218	RLFLKKGLV	4
Q7Z6Z7	2248	NAALKPLET	4
Q7Z6Z7	2712	GKEDKENRD	4
Q7Z6Z7	3244	IETPKLTTS	4
Q7Z6Z7	3274	DLLHKMESK	4
Q7Z6Z7	3345	IQLAKVFPS	4
Q7Z6Z7	3357	QQRTKETNC	4
Q7Z6Z7	3409	KNSVKSVPV	4
Q7Z6Z7	3452	LLTEKLLRL	4
Q7Z6Z7	3468	LPENKVSEA	4
Q7Z6Z7	3677	TTKLKGKMQ	4
Q7Z6Z7	3679	KLKGKMQSR	4
Q7Z6Z7	3743	RANKKAKQT	4
Q7Z6Z7	3837	GEKEKEERP	4
Q7Z6Z7	3912	LAHIKDEPP	4
Q7Z6Z7	4014	EGLRKEDMA	4
Q7Z6Z7	4139	HILGKSVRY	4
Q7Z6Z7	4203	TEENKKEYV	4
Q7Z6Z7	4236	EIIPKRLIS	4
Q8IU81	56	ARQLKRSHV	4
Q8IU81	200	FEKEKQQRN	4
Q8IU81	306	REPGKALAS	4
Q8IU81	427	IAALKNVAE	4
O15054	168	QHRAKVLPP	4
O15054	447	HSSRKPFLG	4
O15054	700	ANIMKMLDE	4
O15054	959	PAQAKEEAG	4
O15054	977	KRRQKEHQK	4
O15054	981	KEHQKEHRR	4
O15054	1004	EGRAKAKAK	4
O15054	1008	KAKAKVPKE	4
O15054	1033	QGREKSRPD	4
O15054	1043	GGASKAKPP	4
O15054	1115	ESGDKETFI	4
O15054	1150	SRNAKVKGK	4
O15054	1152	NAKVKGKFR	4
O15054	1175	NTEEKLPRE	4
O15054	1327	HHIIKFGTN	4
O15054	1338	LSDAKRWKP	4
O15054	1526	ARTVKISDP	4
O15054	1537	FKMIKFCLL	4
O15054	1559	VRAGKKIAY	4
O15054	1560	RAGKKIAYQ	4
Q969V6	29	YLKRKIRSR	4
Q969V6	57	SLQAKQLKL	4
Q969V6	62	QLKLKRARL	4
Q969V6	73	DLNEKIAQR	4
Q969V6	86	ELVEKNILP	4
Q969V6	219	SASEKSQRS	4
Q969V6	225	QRSKKAKEL	4
Q969V6	247	PPDQKQDRG	4
Q969V6	294	PAPPKSAGE	4
Q969V6	402	SILHKAGEV	4
Q969V6	499	QILVKEEGP	4
Q969V6	523	EGRDKDQML	4
Q969V6	530	MLQEKDKQI	4
Q969V6	576	GTPVKQENS	4
Q9ULH7	27	PLKEKECLE	4
Q9ULH7	36	GSNQKSLKE	4
Q9ULH7	89	FLKHKIRSR	4
Q9ULH7	122	QMKLKRARL	4
Q9ULH7	133	DLNEKIAQR	4
Q9ULH7	146	ELVEKNILP	4
Q9ULH7	266	PALVKQSHP	4
Q9ULH7	281	HRSKKCKDP	4
Q9ULH7	306	QKGEKNEPQ	4
Q9ULH7	335	LSQQKQHYN	4
Q9ULH7	354	PLNDKNSNS	4
Q9ULH7	402	KTELKLRGL	4
Q9ULH7	559	DAAEKDRKL	4
Q9ULH7	562	EKDRKLQEK	4
Q9ULH7	566	KLQEKEKQI	4
Q9ULH7	574	IEELKRKLE	4
Q9ULH7	576	ELKRKLEQE	4
Q9ULH7	582	EQEQKLVEV	4
Q9ULH7	615	GHSVKSDQK	4
Q9ULH7	664	TLVAKKAVV	4
Q9ULH7	670	AVVIKQEVP	4
Q9ULH7	790	QQVRKVFTN	4
Q9ULH7	819	PFINKASNS	4
Q9ULH7	908	DILIKSGEI	4
P01106	126	ETFIKNIII	4
P01106	143	SAAAKLVSE	4
P01106	148	LVSEKLASY	4
P01106	298	PLVLKRCHV	4
P01106	323	YPAAKRVKL	4
P01106	355	EENVKRRTH	4
P01106	392	EKAPKVVIL	4
P01106	398	VILKKATAY	4
P01106	422	DLLRKRREQ	4
P01106	430	QLKHKLEQL	4
Q8IZQ8	53	HEQRKHLDS	4
Q8IZQ8	59	LDSDKAKNS	4
Q8IZQ8	65	KNSLKRKAR	4
Q8IZQ8	67	SLKRKARNR	4
Q8IZQ8	100	QMKLKRARL	4
Q8IZQ8	111	DLNEKIALR	4
Q8IZQ8	124	ELVEKNILP	4
Q8IZQ8	183	PPDAKASDT	4
Q8IZQ8	222	SDAGKQGLG	4
Q8IZQ8	241	AVKSKSLGD	4
Q8IZQ8	517	LDSEKDKML	4
Q8IZQ8	519	SEKDKMLVE	4
Q8IZQ8	571	AASIKQEEA	4
Q8IZQ8	588	QVPVKRQSS	4
Q8IZQ8	644	LGAVKSPQH	4
Q8IZQ8	699	KVGPKFSIP	4
Q8IZQ8	709	PTFSKSSSA	4
Q8IZQ8	766	QKVPKIPRS	4
P61218	98	MKELKARKI	4
P36873	41	GLCLKSREI	4
P36873	150	IKLWKTFTD	4
P36873	234	EVVAKFLHK	4
P36873	260	EFFAKRQLV	4
P36873	319	GMITKQAKK	4
O14744	85	LIVGKLSPW	4
O14744	98	SKVEKIRRN	4
O14744	184	SGEEKTWMW	4
O14744	240	FLTNKKGFP	4
O14744	241	LTNKKGFPV	4
O14744	275	HHSEKEFCS	4
O14744	329	EVFEKDPIK	4
O14744	333	KDPIKYSQY	4
O14744	343	QAIYKCLLD	4
O14744	354	PEEEKDTNV	4
O14744	428	VAPEKADII	4
O14744	458	QHFLKDDGV	4
O14744	587	LFPIKQPIT	4
Q6ZTQ3	49	FINEKTFIT	4
Q6ZTQ3	110	IQDEKPFSS	4
Q6ZTQ3	154	PMSEKRNSQ	4
Q6ZTQ3	194	ALVRKRMKP	4
Q6ZTQ3	204	MMDRKERQK	4
Q6ZTQ3	208	KERQKNRAS	4
Q6ZTQ3	253	QLLQKFKIE	4
Q6ZTQ3	255	LQKFKIENS	4
Q6ZTQ3	279	RRLKKTDIP	4
Q6ZTQ3	350	FNKEKAIIL	4
Q6ZTQ3	360	CLQNKLVIK	4
O43353	47	QVAVKHLHI	4
O43353	148	HHDLKTQNI	4
O43353	203	EPGQKSRAS	4
O43353	209	RASIKHDIY	4
O43353	226	VLSRKQPFE	4
O43353	310	VIQLKKTKL	4
O43353	311	IQLKKTKLQ	4
O43353	327	LCDKKKMEL	4
O43353	376	FLSRKAQDC	4
O43353	480	LVSTKPTRT	4
O43353	503	EEFAKVIVQ	4
Q9Y224	5	MFRRKLTAL	4
Q9Y224	41	IRHYKIEDR	4
Q9Y224	72	NCPFKIQDR	4
Q9Y224	98	DNAEKYKDL	4
Q9Y224	154	LVMLKAIRI	4
Q9Y224	171	DAVAKANQT	4
Q9Y224	185	VALDKHILG	4
Q9Y224	218	ELQTKINEA	4
Q9Y224	234	IADPKTDHR	4
P42226	9	GLVSKMPPE	4
P42226	108	QGEKKAVME	4
P42226	129	QEELKFKTG	4
P42226	131	ELKFKTGLR	4
P42226	205	IQIWKRQQQ	4
P42226	252	ELEPKTRAS	4
P42226	277	FLVEKQPPQ	4
P42226	288	KTQTKFQAG	4
P42226	307	GAPAKPPLV	4
P42226	366	NLLLKKIKR	4
P42226	367	LLLKKIKRC	4
P42226	383	VTEEKCAVL	4
P42226	450	VPWEKMCET	4
P42226	526	LDLTKRCLR	4
P42226	618	NLYPKKPKD	4
P42226	636	EQMGKDGRG	4
Q15170	30	STLPKSSPP	4
Q15170	74	GLSRKDLFE	4
Q15170	141	RVRNKLMIM	4
Q15170	148	IMHWKAKRS	4
Q07912	64	WEAVKRRKA	4
Q07912	67	VKRRKALCK	4
Q07912	124	LIGEKDLRL	4
Q07912	158	SVAVKCLKP	4
Q07912	219	DRLRKHQGH	4
Q07912	291	QEHRKVPFA	4
Q07912	345	HKIDKEGER	4
Q07912	371	CWAHKPEDR	4
Q07912	404	EEPDKLHIQ	4
Q07912	550	LWLAKPSAR	4
Q07912	559	VPGTKASRG	4
Q07912	1011	GECHKVLEM	4
Q69YN4	78	NNVSKPSAP	4
Q69YN4	160	KRNPKHADG	4
Q69YN4	356	SCPYKTTFE	4
Q69YN4	367	ISRMKDQGP	4
Q69YN4	373	QGPDKENSG	4
Q69YN4	384	EASVKLTEL	4
Q69YN4	413	SLIIKGLSY	4
Q69YN4	424	LKNTKQDSL	4
Q69YN4	556	AILQKCHFY	4
Q69YN4	651	QQPVKSFPT	4
Q69YN4	705	LQATKDVLK	4
Q69YN4	716	AQSQKGLLF	4
Q69YN4	887	ENNAKLQEL	4
Q69YN4	916	IEYVKQNID	4
Q69YN4	978	RVLQKLNSI	4
Q69YN4	1014	LTLLKTMLT	4
Q69YN4	1145	LNTRKLWSM	4
Q69YN4	1156	HVQAKLLQE	4
Q69YN4	1216	EDKEKQYTS	4
Q69YN4	1251	NGTIKGDER	4
Q69YN4	1320	SLPNKELMT	4
Q69YN4	1365	LFHLKSSLR	4
Q69YN4	1388	STFSKDTGE	4
Q69YN4	1458	LELEKLVLE	4
Q69YN4	1584	PGRTKTTKG	4
Q69YN4	1643	FRQRKQNTS	4
Q69YN4	1679	KRPLKVSQK	4
P37231	107	QSAIKVEPA	4
P37231	125	QLYNKPHEE	4
P37231	185	RIHKKSRNK	4
P37231	189	KSRNKCQYC	4
P37231	218	PQAEKEKLL	4
P37231	244	RALAKHLYD	4
P37231	289	MGEDKIKFK	4
P37231	382	REFLKSLRK	4
P37231	386	KSLRKPFGD	4
P37231	462	QLFAKLLQK	4
P37231	486	QVIKKTETD	4
Q9UBK2	194	SNKAKSICQ	4
Q9UBK2	201	CQQQKPQRR	4
Q9UBK2	235	SSRDKCTSK	4
Q9UBK2	239	KCTSKKKSH	4
Q9UBK2	271	PNDPKGSPF	4
Q9UBK2	321	KSSCKTVVP	4
Q9UBK2	346	NNSTKKGPE	4
Q9UBK2	360	AQLSKSSVL	4
Q9UBK2	374	ERKTKRPSL	4
Q9UBK2	413	QLENKDVSS	4
Q9UBK2	451	CSTRKQLQD	4
Q9UBK2	464	AELNKHFGH	4
Q9UBK2	496	EQFSKLPMF	4
Q9UBK2	520	DESDKLSYP	4
Q9UBK2	646	HERLKREEY	4
Q9UBK2	663	SERAKQRER	4
Q9UBK2	754	FCGRKQFFK	4
Q9UBK2	758	KQFFKSNYA	4
P50549	31	TNVRKRKFI	4
P50549	87	GLPLKIKKE	4
P50549	89	PLKIKKEPH	4
P50549	257	PLMIKQEPR	4
P50549	311	VVPEKFDGD	4
P50549	317	DGDIKQEPG	4
P50549	399	YYYEKGIMQ	4
P35222	19	EPDRKAAVS	4
P35222	170	VVVNKAAVM	4
P35222	180	HQLSKKEAS	4
P35222	242	PALVKMLGS	4
P35222	281	GGLQKMVAL	4
P35222	288	ALLNKTNVK	4
P35222	433	CNNYKNKMM	4
P35222	435	NYKNKMMVC	4
P35222	625	LAQDKEAAE	4
P51532	74	HQMHKPMES	4
P51532	82	SMHEKGMSD	4
P51532	207	AVQGKRPMP	4
P51532	399	DLRTKATIE	4
P51532	437	ALNAKAYKR	4
P51532	455	RITEKLEKQ	4
P51532	471	KRRQKHQEY	4
P51532	484	LQHAKDFKE	4
P51532	502	QKLTKAVAT	4
P51532	572	VRQHKAAQV	4
P51532	580	VAKEKKKKK	4
P51532	582	KEKKKKKKK	4
P51532	583	EKKKKKKKK	4
P51532	584	KKKKKKKKK	4
P51532	585	KKKKKKKKA	4
P51532	586	KKKKKKKAE	4
P51532	587	KKKKKKAEN	4
P51532	588	KKKKKAENA	4
P51532	626	VESGKILTG	4
P51532	687	PVEEKKKIP	4
P51532	689	EEKKKIPDP	4
P51532	760	QYQIKGLEW	4
P51532	867	IIKDKHILA	4
P51532	887	GHRMKNHHC	4
P51532	934	PTIFKSCST	4
P51532	953	MTGEKVDLN	4
P51532	970	RRLHKVLRP	4
P51532	981	LRRLKKEVE	4
P51532	991	QLPEKVEYV	4
P51532	1033	KGGTKTLMN	4
P51532	1140	GMLLKTFNE	4
P51532	1213	SVEEKILAA	4
P51532	1227	NVDQKVIQA	4
P51532	1386	SLTEKQWLK	4
P51532	1390	KQWLKAIEE	4
P51532	1408	VRQKKSSRK	4
P51532	1412	KSSRKRKRD	4
P51532	1414	SRKRKRDSD	4
P51532	1442	KKQKKRGRP	4
P51532	1450	PPAEKLSPN	4
P51532	1461	NLTKKMKKI	4
P51532	1463	TKKMKKIVD	4
P51532	1464	KKMKKIVDA	4
P51532	1503	ELIRKPVDF	4
P51532	1518	IRNHKYRSL	4
P51532	1527	NDLEKDVML	4
P51532	1563	SVRQKIEKE	4
P51532	1566	QKIEKEDDS	4
P51532	1596	SVKVKIKLG	4
P51532	1598	KVKIKLGRK	4
P51532	1602	KLGRKEKAQ	4
Q09472	123	NSMVKSPMT	4
Q09472	243	PQPLKMGMM	4
Q09472	277	QIQTKTVLS	4
Q09472	291	FAMDKKAVP	4
Q09472	292	AMDKKAVPG	4
Q09472	373	CRTMKNVLN	4
Q09472	418	CLPLKNAGD	4
Q09472	489	QVQAKNQQN	4
Q09472	586	HLVHKLVQA	4
Q09472	614	AYARKVEGD	4
Q09472	639	EKIYKIQKE	4
Q09472	1006	VEDCKMEST	4
Q09472	1024	KTEIKEEED	4
Q09472	1046	GQSKKKIFK	4
Q09472	1103	LSTIKRKLD	4
Q09472	1105	TIKRKLDTG	4
Q09472	1167	CCGRKLEFS	4
Q09472	1180	CCYGKQLCT	4
Q09472	1203	HFCEKCFNE	4
Q09472	1233	EQFSKRKND	4
Q09472	1278	GCLKKSART	4
Q09472	1291	KFSAKRLPS	4
Q09472	1340	KPGMKARFV	4
Q09472	1468	QEWYKKMLD	4
Q09472	1499	LTSAKELPY	4
Q09472	1518	EESIKELEQ	4
Q09472	1549	SKNAKKKNN	4
Q09472	1560	TSKNKSSLS	4
Q09472	1569	RGNKKKPGM	4
Q09472	1570	GNKKKPGMP	4
Q09472	1592	MEKHKEVFF	4
Q09472	1637	LARDKHLEF	4
Q09472	1674	CNECKHHVE	4
Q09472	1769	VQHTKGCKR	4
Q09472	1772	TKGCKRKTN	4
Q09472	1783	CPICKQLIA	4
Q09472	1794	CYHAKHCQE	4
Q09472	1812	NIKQKLRQQ	4
Q09472	2086	AAFIKQRAA	4
P04637	101	VPSQKTYQG	4
P04637	132	PALNKMFCQ	4
P04637	292	NLRKKGEPH	4
P04637	372	HLKSKKGQS	4
P04637	373	LKSKKGQST	4
P04637	381	TSRHKKLMF	4
Q9UNE7	22	GSPEKSPSA	4
Q9UNE7	72	LCYLKMQQH	4
Q9UNE7	95	GQSVKAHFF	4
Q9UNE7	145	IAKKKRWNS	4
Q9UNE7	203	CIEAKHDKY	4
Q9UNE7	223	DEKRKKRDI	4
Q9UNE7	224	EKRKKRDIP	4
Q9UNE7	234	YLCGKISFE	4
Q99750	129	KAHRKLQTH	4
Q99750	142	SQGSKKSKS	4
Q99750	145	SKKSKSSSK	4
Q99750	149	KSSSKSTTS	4
Q9P1T7	36	GKCDKDNTE	4
Q9P1T7	114	HHGAKHGSA	4
Q9P1T7	130	PVSQKMHRK	4
O94953	14	NPSCKIMTF	4
O94953	91	NIQKKAMTV	4
O94953	106	ANSEKYCTP	4
O94953	252	PIILKKYGI	4
O94953	311	CTCRKDMVK	4
O94953	366	RASLKAKLL	4
O94953	449	LRPTKAKSE	4
O94953	451	PTKAKSERK	4
O94953	455	KSERKKKSF	4
O94953	521	ELEAKPRPI	4
O94953	609	MEIKKSRRH	4
O94953	672	QAERKFNAA	4
O94953	701	LQTEKEAPI	4
O94953	723	KSRQKTRPL	4
O94953	905	ITCLKHKSG	4
O94953	994	GNLYKAKFI	4
O94953	1019	QLTVKRGDI	4
O94953	1032	EELPKRVRS	4
P55317	6	LGTVKMEGH	4
P55317	160	GGDAKTFKR	4
P55317	163	AKTFKRSYP	4
P55317	189	QAPSKMLTL	4
P55317	237	RSPDKPGKG	4
P55317	240	DKPGKGSYW	4
P55317	267	QKRFKCEKQ	4
P55317	288	GSGAKGGPE	4
P55317	295	PESRKDPSG	4
P55317	316	GVHGKTGQL	4
P55317	389	QLHLKGDPH	4
P55317	414	EQQHKLDFK	4
P55317	418	KLDFKAYEQ	4
P14859	9	SETSKPSME	4
P14859	30	LDFQKQPVP	4
P14859	73	NVQSKSNEE	4
P14859	301	QRRIKLGFT	4
P14859	315	LAMGKLYGN	4
P14859	341	KNMCKLKPL	4
P14859	381	SRRRKKRTS	4
P14859	396	VALEKSFLE	4
P14859	420	LNMEKEVIR	4
P14859	433	NRRQKEKRI	4
Q99814	8	DKEKKRSSS	4
Q99814	29	CRRSKETEV	4
Q99814	68	LRTHKLLSS	4
Q99814	117	ENISKFMGL	4
Q99814	150	NLSLKNGSG	4
Q99814	253	SMDMKFTYC	4
Q99814	291	ENMTKSHQN	4
Q99814	299	NLCTKGQVV	4
Q99814	385	AVSEKSNFL	4
Q99814	503	EVIEKLFAM	4
Q99814	596	LESKKTEPE	4
Q99814	614	DAGSKASLP	4
Q99814	709	KLKLKRQLE	4
Q99814	738	HLMWKRMKN	4
Q99814	741	WKRMKNLRG	4
Q99814	754	LMPDKPLSA	4
Q99814	796	GENSKSRFP	4
Q9HAZ2	9	ARARKLAKS	4
Q9HAZ2	155	LGSEKFCVD	4
Q9HAZ2	284	AHECKDCER	4
Q9HAZ2	293	MFPNKYSLE	4
Q9HAZ2	310	EREYKCDQC	4
Q9HAZ2	385	LKQHKHIHS	4
Q9HAZ2	471	PMMDKAKPS	4
Q9HAZ2	473	MDKAKPSPS	4
Q9HAZ2	637	PDKDKGKGK	4
Q9HAZ2	641	KGKGKSAEG	4
Q9HAZ2	648	EGQPKFGGG	4
Q9HAZ2	694	GDSIKAIAS	4
Q9HAZ2	752	NLLVKAEPK	4
Q9HAZ2	756	KAEPKSPRD	4
Q9HAZ2	763	RDALKVGGP	4
Q9HAZ2	824	REPRKNHVY	4
Q9HAZ2	872	SRVEKRKVT	4
Q9HAZ2	874	VEKRKVTDP	4
Q9HAZ2	946	PILRKGKER	4
Q9HAZ2	1004	NIHNKEKPF	4
Q9HAZ2	1006	HNKEKPFKC	4
Q9HAZ2	1009	EKPFKCHLC	4
Q9HAZ2	1068	LLDEKEDSY	4
Q9HAZ2	1094	TRTEKRADM	4
Q9HAZ2	1137	SLAGKSQDD	4
Q9HAZ2	1222	SEALKHTLC	4
Q9HAZ2	1230	CRQAKNQAY	4
Q9HAZ2	1259	DAWLKVTGA	4
O14497	101	EPDLKNSNG	4
O14497	327	GGAGKGPAD	4
O14497	622	MTSSKGGQE	4
O14497	994	KTESKSKKS	4
O14497	996	ESKSKKSSS	4
O14497	997	SKSKKSSSS	4
O14497	1021	EPERKMWVD	4
O14497	1059	YVSVKEIGG	4
O14497	1071	VNKNKKWRE	4
O14497	1106	AFECKIERG	4
O14497	1124	AADSKKSQP	4
O14497	1201	STFQKRNSM	4
O14497	1230	YEPNKDPYG	4
O14497	1612	HSGMKMQKA	4
O14497	1677	MMSLKSGLL	4
O14497	1752	GRFSKVSSP	4
O14497	1815	KLPVKIVQK	4
O14497	1819	KIVQKNDPF	4
O14497	1905	GPPEKRITA	4
O14497	1938	KESSKFPFG	4
O14497	1979	DSLAKRCVC	4
O14497	2020	LLHHKHPER	4
O14497	2025	HPERKQAPL	4
O14497	2033	LTYEKEEEQ	4
O14497	2124	ETLSKLSIQ	4
O14497	2243	LALAKVDEN	4
Q92925	136	RRGLKRRKM	4
Q92925	191	PLTQKRKLR	4
Q92925	289	GFQVKRPGD	4
Q92925	297	DLNVKCTLL	4
Q92925	451	INQLKTQRD	4
Q92925	480	RRDLKIITD	4
Q92925	514	HIFAKVQQR	4
P17252	91	PGADKGPDT	4
P17252	105	KHKFKIHTY	4
P17252	158	DHTEKRGRI	4
P17252	165	RIYLKAEVA	4
P17252	209	KNESKQKTK	4
P17252	211	ESKQKTKTI	4
P17252	213	KQKTKTIRS	4
P17252	268	SELMKMPAS	4
P17252	304	ELRQKFEKA	4
P17252	325	SEDRKQPSN	4
P17252	371	IKILKKDVV	4
P17252	388	TMVEKRVLA	4
P17252	478	EGHIKIADF	4
P17252	570	VSVCKGLMT	4
P17252	621	KVCGKGAEN	4
P17252	628	ENFDKFFTR	4
P22694	8	AATAKKGSE	4
P22694	22	EFLAKAKED	4
P22694	24	LAKAKEDFL	4
P22694	48	FERKKTLGT	4
P22694	73	YYAMKILDK	4
P22694	93	TLNEKRILQ	4
P22694	190	FGFAKRVKG	4
P22694	214	IILSKGYNK	4
P22694	218	KGYNKAVDW	4
P22694	296	IKTHKWFAT	4
P22694	343	SITEKCAKE	4
P22612	79	LNKQKVVKM	4
P22612	82	QKVVKMKQV	4
P22612	84	VVKMKQVEH	4
P22612	190	FGFAKRVKG	4
P22612	214	IILSKGYNK	4
P22612	218	KGYNKAVDW	4
P22612	296	IKNHKWFAT	4
P22612	309	AIYEKKVEA	4
P22612	343	SINEKCAKE	4
P22612	346	EKCAKEFSE	4
P10644	32	QALLKDSIV	4
P10644	59	ERLEKEEAK	4
P10644	130	AALAKAIEK	4
P10644	134	KAIEKNVLF	4
P10644	218	TVKAKTNVK	4
P10644	222	KTNVKLWGI	4
P10644	281	EDGQKIVVQ	4
P13861	75	VADAKGDSE	4
P13861	161	ERIVKADEH	4
P13861	250	AKKRKMFES	4
P13861	272	SERMKIVDV	4
P13861	280	VIGEKIYKD	4
P13861	294	TQGEKADSF	4
P13861	318	TKSNKDGGN	4
P13861	332	ARCHKGQYF	4
P13861	345	LVTNKPRAA	4
[truncated: 1,980 more rows]

## Sheet: med stringency (0.75) scoring
Supplementary Table 3B. KDM3A interactome peptides scored with PeSA 0.75 threshold adjusted KDM3A PSSM
uniprot_id	position	window	score
P68431	10	QTARKSTGG	9
Q03164	1534	CVRCKSCGS	7
Q09472	1774	GCKRKTNGG	7
Q03164	2517	QAPRKRTVK	6
Q03164	3962	NCGAKKCRK	6
P0DMV8	493	TATDKSTGK	6
P0DMV9	493	TATDKSTGK	6
P11142	493	SAVDKSTGK	6
P31689	194	KDRCKSCNG	6
O95816	9	KINAKANEG	6
O60884	203	KDRCKKCEG	6
P62701	259	RLAAKQSSG	6
Q8N6H7	222	PAAAKKGLG	6
Q8N6H7	228	GLGAKKGLG	6
O60885	184	GRGRKETGT	6
Q14781	191	KTARKDLGA	6
P68431	28	KAARKSAPA	6
Q16665	719	NAQRKRKME	6
Q7Z6Z7	1470	MTAIKRNGA	6
Q7Z6Z7	3257	KKSSKSCGS	6
Q7Z6Z7	3745	NKKAKQTGR	6
O15054	991	RRACKDSVG	6
P01106	157	QAARKDSGS	6
O43353	326	HLCDKKKME	6
P04637	139	CQLAKTCPV	6
Q9HAZ2	12	RKLAKSDGD	6
Q9HAZ2	101	GVWAKRKME	6
Q9HAZ2	122	RAAAKETDF	6
Q9HAZ2	426	QIKCKDCGQ	6
O60674	73	IAASKACGI	6
P51114	246	QQARKVPGV	6
Q03164	234	GVKIKITHG	5
Q03164	332	QKVRKDKEG	5
Q03164	737	NRKRKRKVF	5
Q03164	818	QRPRKQTSA	5
Q03164	866	RDADKSVEK	5
Q03164	929	SSAKKATGR	5
Q03164	963	KILIKKGRG	5
Q03164	1015	AQADKLPMT	5
Q03164	1176	NCLDKPKFG	5
Q03164	1193	CKMRKCQNL	5
Q03164	1211	QKQAKAVKK	5
Q03164	1480	CRRCKFCHV	5
Q03164	1668	RQAAKPPDL	5
Q03164	1714	GVKRKMDQG	5
Q03164	2063	TDARKRCVY	5
Q03164	2431	QKGKKSCKE	5
Q03164	2434	KKSCKETFK	5
Q03164	3846	GLFCKRNID	5
Q9Y4C1	122	PLLDKAGLG	5
Q9Y4C1	277	SKQAKSCSE	5
Q9Y4C1	332	NLGAKIPQG	5
Q9Y4C1	652	QVAWKRAVK	5
Q9Y4C1	702	GAAYKTFSW	5
Q9Y2Z0	330	RAMNKSFME	5
Q12931	629	QQLAKTQEE	5
P07900	112	GTIAKSGTK	5
P07900	564	KQEEKKTKF	5
P08238	107	GTIAKSGTK	5
P0DMV8	159	RQATKDAGV	5
P0DMV8	271	CERAKRTLS	5
P0DMV8	500	GKANKITIT	5
P0DMV8	573	KVLDKCQEV	5
P0DMV9	159	RQATKDAGV	5
P0DMV9	271	CERAKRTLS	5
P0DMV9	500	GKANKITIT	5
P0DMV9	573	KVLDKCQEV	5
P11142	159	RQATKDAGT	5
P11142	271	CERAKRTLS	5
P11142	573	KILDKCNEI	5
P62424	25	KQEAKKVVN	5
P62424	120	ARAEKKAAG	5
P62424	121	RAEKKAAGK	5
P62424	197	LVHRKTCTT	5
P15880	58	KAEDKEWMP	5
P15880	183	TVPCKVTGR	5
P15880	238	GNFAKATFD	5
P31689	136	VICDKCEGR	5
P62701	128	CKVRKIFVG	5
Q99598	40	MLAFKSFQQ	5
P10275	521	PTCVKSEMG	5
P10275	619	CRLRKCYEA	5
P10275	721	VKWAKALPG	5
P10275	846	IIACKRKNP	5
Q8N6H7	286	QIDRKKEEK	5
Q8N6H7	497	KQGVKSVAG	5
P35226	40	HSFCKTCIV	5
P35226	314	NRPRKSSVN	5
O60885	291	GVKRKADTT	5
O60885	1330	ELARKREQE	5
Q14781	74	RKRGKRPRG	5
Q14781	82	GRPRKLTAM	5
Q14781	219	KAHAKEACG	5
Q14781	277	RLALKAQAT	5
Q14781	283	QATNKCGLG	5
Q14781	451	GEARKAATL	5
O00257	205	GAGAKGYLG	5
O00257	278	MQAVKIKSG	5
O00257	312	RTFKKAAGA	5
Q9Y3E7	53	KDAAKKGQK	5
P33316	179	GLAAKHFID	5
Q5VYK3	227	FYAAKRVIG	5
Q5VYK3	766	RYLAKKKMR	5
Q5VYK3	1056	GALGKTPDG	5
Q5VYK3	1261	CLLDKGMMS	5
Q15056	123	RKQDKGGFG	5
O00321	310	DIVRKSGGR	5
P22102	111	KRFAKEFMD	5
P22102	459	QPLAKATSR	5
P22102	557	AGIAKACGK	5
P22102	633	KIVAKSSLQ	5
Q13630	306	KQAVKETCA	5
P68431	24	QLATKAARK	5
P68431	57	RRYQKSTEL	5
Q16665	10	GANDKKKIS	5
Q16665	310	RMLAKRGGY	5
Q7Z6Z7	9	RTKLKKTPT	5
Q7Z6Z7	318	QITDKQLME	5
Q7Z6Z7	1072	GLLVKLCVG	5
Q7Z6Z7	1225	SLPAKLPGG	5
Q7Z6Z7	1263	RKPLKVYGG	5
Q7Z6Z7	2126	NAEDKDTPA	5
Q7Z6Z7	2725	CTASKSNDS	5
Q7Z6Z7	3742	RRANKKAKQ	5
Q7Z6Z7	4116	RIVAKAVYD	5
Q8IU81	247	NVRFKKDHG	5
O15054	185	HLEHKRNYG	5
O15054	191	NYGAKRGGP	5
O15054	1006	RAKAKAKVP	5
Q8IZQ8	239	HAAVKSKSL	5
Q8IZQ8	277	QKAEKSPPP	5
Q6ZTQ3	32	KKEEKMTMM	5
Q6ZTQ3	278	QRRLKKTDI	5
P42226	374	RCERKGTES	5
Q07912	71	KALCKRKSW	5
Q07912	73	LCKRKSWMS	5
Q07912	961	RPADKIQMA	5
Q69YN4	576	HLAEKTSSL	5
Q69YN4	1239	HKACKLAIL	5
P37231	145	VCGDKASGF	5
P37231	272	KTTDKSPFV	5
Q9UBK2	254	HLQAKPTTL	5
P51532	548	QKKDKRLAY	5
P51532	1044	MQLRKICNH	5
Q09472	386	CQSGKSCQV	5
Q09472	423	NAGDKRNQQ	5
Q09472	1331	HASDKTVEV	5
Q09472	1554	KKNNKKTSK	5
Q09472	2091	QRAAKYANS	5
P04637	357	AQAGKEPGG	5
P04637	386	KLMFKTEGP	5
Q9UNE7	144	RIAKKKRWN	5
O94953	860	RKRMKKVSG	5
O94953	907	CLKHKSGGH	5
O94953	1059	AKAAKRPRV	5
P14859	382	RRRKKRTSI	5
Q99814	5	MTADKEKKR	5
Q99814	93	NLYLKALEG	5
Q99814	595	QLESKKTEP	5
Q9HAZ2	250	RRHKKYTCG	5
Q9HAZ2	915	FAAMKADSG	5
O14497	1238	GSMRKAPGS	5
O14497	1370	QQNYKRPMD	5
O14497	1382	GPPAKRHEG	5
Q92925	176	TIARKRMEI	5
P17252	307	QKFEKAKLG	5
P17252	579	KHPAKRLGC	5
P22694	47	DFERKKTLG	5
P22612	7	NAPAKKDTE	5
P10644	242	STLRKRKMY	5
P13861	248	NNAKKRKMF	5
P31321	242	STLRKRKMY	5
P31323	263	NNAKKRKMY	5
P31323	326	KITMKRKGK	5
O60674	585	KVLDKAHRN	5
P52597	167	ELAEKALGK	5
P52597	299	GLPYKATEN	5
P05412	258	KAERKRMRN	5
P08151	384	RKHVKTVHG	5
O75582	85	KVLKKATIV	5
O75582	93	VQKAKTTEH	5
O75582	299	MKDPKKRLG	5
O75582	329	DLAAKKVPA	5
O75582	473	ITALKLCEG	5
O75582	716	HTCVKATFH	5
O75582	747	RRKMKKTST	5
P55072	425	QAIRKKMDL	5
P55072	584	DSIAKARGG	5
P55072	696	QRACKLAIR	5
P49368	44	CLGPKSMMK	5
P49368	78	HPAAKSMIE	5
P49368	317	RRVRKTDNN	5
P49368	370	CKDPKACTI	5
P51114	128	NTFFKCTVD	5
P51114	151	HKDFKKAVG	5
P03372	235	KNRRKSCQA	5
P03372	244	CRLRKCYEV	5
P03372	481	RVLDKITDT	5
P03372	492	HLMAKAGLT	5
Q03164	216	KKDSKSIEK	4
Q03164	220	KSIEKKRGR	4
Q03164	257	LKKIKRTPS	4
Q03164	269	QQATKIKKL	4
Q03164	295	QIGRKGVQI	4
Q03164	345	TKEDKTVVR	4
Q03164	380	LQRAKKGAQ	4
Q03164	381	QRAKKGAQK	4
Q03164	385	KGAQKKIEK	4
Q03164	400	GRKVKTQVK	4
Q03164	609	QGKRKSILR	4
Q03164	645	GLIRKPIFD	4
Q03164	739	KRKRKVFSP	4
Q03164	853	RNKDKAPEE	4
Q03164	892	SRKEKRKKG	4
Q03164	894	KEKRKKGSE	4
Q03164	928	SSSAKKATG	4
Q03164	934	ATGRKKSSS	4
Q03164	957	TTAVKTKIL	4
Q03164	1031	LKKAKAQLC	4
Q03164	1039	CKIEKSKSL	4
Q03164	1082	ALGRKRAVF	4
Q03164	1113	GNDDKSSIA	4
Q03164	1185	GRNIKKQCC	4
Q03164	1190	KQCCKMRKC	4
Q03164	1214	AKAVKKKEK	4
Q03164	1215	KAVKKKEKK	4
Q03164	1218	KKKEKKSKT	4
Q03164	1219	KKEKKSKTS	4
Q03164	1225	KTSEKKDSK	4
Q03164	1270	PVEEKSEEG	4
Q03164	1293	PASRKSSKQ	4
Q03164	1321	KEVPKTTPS	4
Q03164	1493	HQATKQLLE	4
Q03164	1565	KLFAKGNFC	4
Q03164	1574	PLCDKCYDD	4
Q03164	1590	MQCGKCDRW	4
Q03164	1962	CSRAKNCVF	4
Q03164	1970	FLDDKKVYC	4
Q03164	2009	SLRRKFLNG	4
Q03164	2314	VLSSKSSEG	4
Q03164	2430	RQKGKKSCK	4
Q03164	2490	KIGDKGLSM	4
Q03164	2521	KRTVKVTLT	4
Q03164	2658	KKRGKRSAE	4
Q03164	2736	ATTRKSSQI	4
Q03164	2742	SQIPKRNGK	4
Q03164	2746	KRNGKENGT	4
Q03164	3384	NLLIKASQQ	4
Q03164	3462	LLASKTGIH	4
Q03164	3602	QSSQKECGQ	4
Q03164	3655	QQEQKRKES	4
Q03164	3824	FRHLKKTSK	4
Q03164	3828	KKTSKEAVG	4
Q03164	3870	IQTDKREKY	4
Q03164	3933	FAMRKIYRG	4
Q03164	3963	CGAKKCRKF	4
Q9Y4C1	62	KKDLKVCVE	4
Q9Y4C1	100	LAERKSPEI	4
Q9Y4C1	188	LKGDKNLVG	4
Q9Y4C1	219	NPASKTLQV	4
Q9Y4C1	263	AVKRKSSEN	4
Q9Y4C1	353	CLNTKSEAL	4
Q9Y4C1	371	GLLSKSSQI	4
Q9Y4C1	394	CTQPKTNTD	4
Q9Y4C1	421	CLPTKASSK	4
Q9Y4C1	425	KASSKAELE	4
Q9Y4C1	470	NCSGKKVEP	4
Q9Y4C1	656	KRAVKGVRE	4
Q9Y4C1	693	RMKRKNCQQ	4
Q9Y4C1	779	LAGEKPTLG	4
Q9Y4C1	805	EAASKPAGS	4
Q9Y4C1	918	LVQNKTTSD	4
Q9Y4C1	1180	IYAAKDTEK	4
Q9Y4C1	1220	RSLRKRLHQ	4
Q9Y2Z0	69	VADAKKSLE	4
Q9Y2Z0	152	SVWIKRCQE	4
Q9Y2Z0	289	RNWDKLVGE	4
Q12931	95	QAETKKLLD	4
Q12931	324	QAHDKPRYT	4
Q12931	375	LIQTKATDI	4
Q12931	544	REFDKKKLI	4
Q12931	577	CLSEKETEE	4
Q12931	652	HALIKKLNQ	4
P07900	116	KSGTKAFME	4
P07900	147	LVAEKVTVI	4
P07900	274	KDGDKKKKK	4
P07900	278	KKKKKKIKE	4
P07900	327	HLAVKHFSV	4
P07900	414	KVIRKNLVK	4
P07900	418	KNLVKKCLE	4
P07900	419	NLVKKCLEL	4
P07900	457	SQNRKKLSE	4
P07900	631	YMAAKKHLE	4
P07900	632	MAAKKHLEI	4
P07900	657	DKNDKSVKD	4
P08238	111	KSGTKAFME	4
P08238	266	GKDKKKKTK	4
P08238	267	KDKKKKTKK	4
P08238	270	KKKTKKIKE	4
P08238	319	HLAVKHFSV	4
P08238	406	KVIRKNIVK	4
P08238	410	KNIVKKCLE	4
P08238	411	NIVKKCLEL	4
P08238	505	ERVRKRGFE	4
P08238	573	EILDKKVEK	4
P08238	577	KKVEKVTIS	4
P08238	649	DKNDKAVKD	4
P0DMV8	56	GDAAKNQVA	4
P0DMV8	71	VFDAKRLIG	4
P0DMV8	220	IFEVKATAG	4
P0DMV8	250	KRKHKKDIS	4
P0DMV8	328	AKLDKAQIH	4
P0DMV8	539	RVSAKNALE	4
P0DMV8	567	SEADKKKVL	4
P0DMV9	56	GDAAKNQVA	4
P0DMV9	71	VFDAKRLIG	4
P0DMV9	220	IFEVKATAG	4
P0DMV9	250	KRKHKKDIS	4
P0DMV9	328	AKLDKAQIH	4
P0DMV9	539	RVSAKNALE	4
P0DMV9	567	SEADKKKVL	4
P12004	80	SKILKCAGN	4
P12004	217	NFFTKATPL	4
P11142	56	GDAAKNQVA	4
P11142	71	VFDAKRLIG	4
P11142	187	YGLDKKVGA	4
P11142	220	IFEVKSTAG	4
P11142	250	KRKHKKDIS	4
P11142	328	AKLDKSQIH	4
P11142	500	GKENKITIT	4
P11142	535	KQRDKVSSK	4
P11142	589	QTAEKEEFE	4
P62424	5	MPKGKKAKG	4
P62424	6	PKGKKAKGK	4
P62424	8	GKKAKGKKV	4
P62424	10	KAKGKKVAP	4
P62424	101	KLAHKYRPE	4
P62424	125	KAAGKGDVP	4
P62424	187	IIKGKARLG	4
P62424	217	GALAKLVEA	4
P62424	259	KAKAKELAT	4
P15880	125	RTRFKAFVA	4
P15880	142	GLGVKCSKE	4
P31689	28	KAYRKLALK	4
P31689	32	KLALKYHPD	4
P31689	73	EQAIKEGGA	4
P31689	125	GATRKLALQ	4
P31689	143	GRGGKKGAV	4
O95816	5	MAQAKINAK	4
O95816	171	QKKIKRRLE	4
O95816	200	GAGSKTLQQ	4
O60884	30	KAYRKLAKE	4
O60884	33	RKLAKEYHP	4
O60884	46	NAGDKFKEI	4
O60884	152	GQGGKSGAV	4
O60884	158	GAVQKCSAC	4
O60884	204	DRCKKCEGK	4
O60884	208	KCEGKKVIK	4
O60884	297	QIVVKYPPG	4
P62701	10	KKHLKRVAA	4
P62701	16	VAAPKHWML	4
P62701	22	WMLDKLTGV	4
P62701	71	QRFIKIDGK	4
Q99598	12	GGFRKRKHD	4
Q99598	68	TVESKRTIF	4
Q99598	164	GKENKTPSS	4
Q99598	173	DAQDKQFGT	4
Q99598	261	CYALKVRGS	4
P10275	17	RPPSKTYRG	4
P10275	241	KELCKAVSV	4
P10275	301	DSAGKSTED	4
P10275	585	KVFFKRAAE	4
P10275	606	CTIDKFRRK	4
P10275	610	KFRRKNCPS	4
P10275	633	ARKLKKLGN	4
P10275	778	YRMHKSRMY	4
P10275	884	DLLIKSHMV	4
Q8N6H7	15	QTLFKRLRA	4
Q8N6H7	203	GTSPKASLE	4
Q8N6H7	223	AAAKKGLGA	4
Q8N6H7	253	QVAEKLREQ	4
Q8N6H7	263	AADAKKQAE	4
Q8N6H7	290	KKEEKKLQN	4
Q8N6H7	298	NLEGKKREQ	4
Q8N6H7	336	PVSAKSSRS	4
Q8N6H7	429	FAGAKAISS	4
P56211	42	HLGQKPGGS	4
P56211	69	YNMAKAKMK	4
P56211	71	MAKAKMKNK	4
P56211	84	AAPDKTEVT	4
P56211	109	LVASKLAG	4
P35226	73	IRSDKTLQD	4
P35226	146	RLDRKVNKD	4
P35226	161	EVNDKRYLR	4
P35226	232	RPTCKRMKI	4
O60885	72	RVVLKTLWK	4
O60885	102	YKIIKTPMD	4
O60885	112	GTIKKRLEN	4
O60885	177	IVQAKGRGR	4
O60885	283	PQPVKTKKG	4
O60885	289	KKGVKRKAD	4
O60885	355	SEQLKCCSG	4
O60885	456	MRFAKMPDE	4
O60885	538	NKPKKKEKD	4
O60885	543	KEKDKKEKK	4
O60885	547	KKEKKKEKH	4
O60885	564	NKKSKAKEP	4
O60885	677	SCLRKKRKP	4
O60885	678	CLRKKRKPQ	4
O60885	680	RKKRKPQAE	4
O60885	736	GREQKKHHH	4
O60885	1092	NVQPKKQEL	4
O60885	1177	GAPDKDKQK	4
O60885	1185	KQEPKTPVA	4
O60885	1191	PVAPKKDLK	4
O60885	1242	EKALKAQAE	4
Q14781	20	CILSKRLRK	4
Q14781	24	KRLRKGKLE	4
Q14781	71	VQNRKRGKR	4
Q14781	131	DLDAKRGPR	4
Q14781	162	DPIRKKRGR	4
Q14781	167	KRGRKPLPP	4
Q14781	215	LAALKAHAK	4
Q14781	310	SKIPKAPSG	4
Q14781	390	PAPGKGTGS	4
O00257	23	KRIRKGRVE	4
O00257	71	MGYRKRGPK	4
O00257	114	GAQGKGQGH	4
O00257	157	QLNSKKHHP	4
O00257	191	DLGAKSHPP	4
O00257	197	HPPDKWAQG	4
O00257	311	DRTFKKAAG	4
O00257	319	GAEEKKVEA	4
O00257	411	SHVRKRCLS	4
O00257	425	REPCKKRLT	4
Q9Y3E7	6	GLFGKTQEK	4
Q9Y3E7	72	IRSRKAVSK	4
Q9Y3E7	81	LYASKAHMN	4
Q9Y3E7	106	GSLQKSTEV	4
Q9Y3E7	179	GALGKAPSK	4
Q9Y3E7	183	KAPSKVTDA	4
Q96FZ7	29	QQRDKLRQY	4
Q96FZ7	35	RQYQKRIAQ	4
Q96FZ7	65	KLLLKKKRY	4
Q96FZ7	99	QIEMKVMEG	4
Q96FZ7	189	NVPVKARPR	4
P33316	84	GELPKAGGS	4
P33316	155	KAVVKTDIQ	4
Q5VYK3	56	EGVRKKVME	4
Q5VYK3	70	NKRIKSRPK	4
Q5VYK3	166	NLAEKPKTV	4
Q5VYK3	304	NKMYKVYLG	4
Q5VYK3	313	DIPLKTKEG	4
Q5VYK3	502	QVAVKFAST	4
Q5VYK3	547	GRNRKESTS	4
Q5VYK3	577	KTPVKYMTG	4
Q5VYK3	690	KLATKFVDK	4
Q5VYK3	694	KFVDKTEWI	4
Q5VYK3	738	EQLIKTTKD	4
Q5VYK3	767	YLAKKKMRM	4
Q5VYK3	980	HKEVKSHLK	4
Q5VYK3	1007	DVASKGLGL	4
Q5VYK3	1153	LVTDKSMVD	4
Q5VYK3	1229	ELALKTLSK	4
Q5VYK3	1233	KTLSKVCVK	4
Q5VYK3	1237	KVCVKMCDP	4
Q5VYK3	1243	CDPAKGAAG	4
Q5VYK3	1283	VKISKSAGA	4
Q5VYK3	1336	LSAAKSSPM	4
Q5VYK3	1418	SVIQKSCAF	4
Q5VYK3	1442	KLLQKLNGW	4
Q5VYK3	1622	QAVLKECSK	4
Q5VYK3	1838	AALLKKTLE	4
Q15056	76	LVRDKDTDK	4
Q15056	80	KDTDKFKGF	4
O00321	285	WGERKRKPG	4
O00321	287	ERKRKPGMN	4
P22102	148	ALVVKASGL	4
P22102	162	VIVAKSKEE	4
P22102	169	EEACKAVQE	4
P22102	375	GTALKNGKV	4
P22102	411	LAAIKFEGA	4
P22102	419	AIYRKDVGF	4
P22102	467	RSGCKVDLG	4
P22102	561	KACGKAGCA	4
Q13630	21	GLVGKAIQK	4
Q13630	121	IFPDKTTYP	4
Q13630	199	VHLAKSSGS	4
Q13630	282	GQFKKTASN	4
P68431	5	MARTKQTAR	4
P68431	19	KAPRKQLAT	4
P68431	116	AIHAKRVTI	4
Q16665	21	RRKEKSRDA	4
Q16665	94	CFYLKALDG	4
Q16665	172	FLRMKCTLT	4
Q16665	213	QCGYKKPPM	4
Q16665	629	KTVTKDRME	4
Q16665	674	NRAGKGVIE	4
Q16665	721	QRKRKMEHD	4
Q16665	753	SLSWKRVKG	4
Q16665	759	VKGCKSSEQ	4
Q7Z6Z7	155	LGSDKRTPL	4
Q7Z6Z7	214	VKIEKRTTS	4
Q7Z6Z7	469	DLCRKECPF	4
Q7Z6Z7	988	TQGGKRSDG	4
Q7Z6Z7	1572	LQAAKEQKE	4
Q7Z6Z7	1693	NKNSKNSNG	4
Q7Z6Z7	1715	DIKRKENKG	4
Q7Z6Z7	1799	FAELKSTRM	4
Q7Z6Z7	1926	VQLVKTTPL	4
Q7Z6Z7	1964	EEADKSDPK	4
Q7Z6Z7	2046	GKKDKEGDR	4
Q7Z6Z7	2063	GKGSKPLMP	4
Q7Z6Z7	2203	SATAKTQHN	4
Q7Z6Z7	2218	RLFLKKGLV	4
Q7Z6Z7	2248	NAALKPLET	4
Q7Z6Z7	2707	KITDKGKED	4
Q7Z6Z7	2712	GKEDKENRD	4
Q7Z6Z7	3357	QQRTKETNC	4
Q7Z6Z7	3370	ERGNKACSP	4
Q7Z6Z7	3403	NVSRKGKNS	4
Q7Z6Z7	3558	KSPAKVSDG	4
Q7Z6Z7	3636	YTLCKQIGT	4
Q7Z6Z7	3697	VASQKRPLG	4
Q7Z6Z7	3716	MLTSKTSTQ	4
Q7Z6Z7	3743	RANKKAKQT	4
Q7Z6Z7	4037	ELHRKSPEE	4
Q7Z6Z7	4139	HILGKSVRY	4
Q7Z6Z7	4221	GAIRKQLAA	4
Q8IU81	382	PRRRKASPE	4
Q8IU81	394	EAAGKMTTE	4
Q8IU81	438	GHSPKDPGG	4
Q8IU81	536	REFIKAQGP	4
O15054	447	HSSRKPFLG	4
O15054	959	PAQAKEEAG	4
O15054	1008	KAKAKVPKE	4
O15054	1043	GGASKAKPP	4
O15054	1150	SRNAKVKGK	4
O15054	1381	QLYMKVPGS	4
O15054	1559	VRAGKKIAY	4
Q969V6	62	QLKLKRARL	4
Q969V6	202	IPTAKSTPT	4
Q969V6	225	QRSKKAKEL	4
Q969V6	294	PAPPKSAGE	4
Q969V6	499	QILVKEEGP	4
Q9ULH7	280	KHRSKKCKD	4
Q9ULH7	281	HRSKKCKDP	4
Q9ULH7	402	KTELKLRGL	4
Q9ULH7	664	TLVAKKAVV	4
Q9ULH7	665	LVAKKAVVI	4
Q9ULH7	790	QQVRKVFTN	4
P01106	143	SAAAKLVSE	4
P01106	275	QAPGKRSES	4
P01106	298	PLVLKRCHV	4
P01106	323	YPAAKRVKL	4
P01106	341	SNNRKCTSP	4
P01106	398	VILKKATAY	4
P01106	422	DLLRKRREQ	4
Q8IZQ8	67	SLKRKARNR	4
Q8IZQ8	241	AVKSKSLGD	4
Q8IZQ8	560	NCSEKKPLP	4
Q8IZQ8	588	QVPVKRQSS	4
P61218	50	QANQKRITT	4
P61218	98	MKELKARKI	4
P61218	101	LKARKIPII	4
P36873	41	GLCLKSREI	4
P36873	60	EAPLKICGD	4
P36873	301	KPAEKKKPN	4
O14744	35	GAVAKQGFD	4
O14744	60	QEPAKNRPG	4
O14744	343	QAIYKCLLD	4
O14744	380	LRAAKQADR	4
Q6ZTQ3	194	ALVRKRMKP	4
Q6ZTQ3	197	RKRMKPLMM	4
Q6ZTQ3	279	RRLKKTDIP	4
Q6ZTQ3	364	KLVIKTETT	4
O43353	47	QVAVKHLHI	4
O43353	110	LLHRKTEYP	4
O43353	310	VIQLKKTKL	4
O43353	376	FLSRKAQDC	4
O43353	410	FCDHKTTPC	4
Q9Y224	5	MFRRKLTAL	4
Q9Y224	171	DAVAKANQT	4
Q9Y224	185	VALDKHILG	4
P42226	108	QGEKKAVME	4
P42226	194	LEAAKALVL	4
P42226	288	KTQTKFQAG	4
P42226	307	GAPAKPPLV	4
P42226	366	NLLLKKIKR	4
P42226	369	LKKIKRCER	4
P42226	423	DNNAKATIL	4
P42226	618	NLYPKKPKD	4
Q15170	74	GLSRKDLFE	4
Q15170	150	HWKAKRSRP	4
Q07912	67	VKRRKALCK	4
Q07912	100	STFRKTSPA	4
Q07912	131	RLLEKLGDG	4
Q07912	158	SVAVKCLKP	4
Q07912	219	DRLRKHQGH	4
Q07912	345	HKIDKEGER	4
Q69YN4	160	KRNPKHADG	4
Q69YN4	356	SCPYKTTFE	4
Q69YN4	373	QGPDKENSG	4
Q69YN4	528	RQNEKSGYQ	4
Q69YN4	651	QQPVKSFPT	4
Q69YN4	880	LKLCKADEN	4
Q69YN4	1078	GVNEKLTIS	4
Q69YN4	1156	HVQAKLLQE	4
Q69YN4	1236	LASHKACKL	4
Q69YN4	1388	STFSKDTGE	4
Q69YN4	1558	ELSEKCCSD	4
Q69YN4	1584	PGRTKTTKG	4
P37231	184	CRIHKKSRN	4
P37231	185	RIHKKSRNK	4
P37231	197	CRFQKCLAV	4
P37231	244	RALAKHLYD	4
P37231	260	LTKAKARAI	4
P37231	268	ILTGKTTDK	4
P37231	329	TEYAKSIPG	4
P37231	386	KSLRKPFGD	4
P37231	462	QLFAKLLQK	4
P37231	466	KLLQKMTDL	4
P37231	485	LQVIKKTET	4
P37231	486	QVIKKTETD	4
Q9UBK2	235	SSRDKCTSK	4
Q9UBK2	239	KCTSKKKSH	4
Q9UBK2	240	CTSKKKSHT	4
Q9UBK2	321	KSSCKTVVP	4
Q9UBK2	372	HEERKTKRP	4
Q9UBK2	480	DEADKTGEL	4
Q9UBK2	671	RQRQKAIEE	4
Q9UBK2	758	KQFFKSNYA	4
P50549	25	NCNEKPTNV	4
P50549	404	GIMQKVAGE	4
P35222	180	HQLSKKEAS	4
P35222	233	LAIFKSGGI	4
P35222	394	DAATKQEGM	4
P35222	508	WPLIKATVG	4
P51532	207	AVQGKRPMP	4
P51532	399	DLRTKATIE	4
P51532	437	ALNAKAYKR	4
P51532	440	AKAYKRSKR	4
P51532	467	EQERKRRQK	4
P51532	499	GKIQKLTKA	4
P51532	502	QKLTKAVAT	4
P51532	584	KKKKKKKKK	4
P51532	585	KKKKKKKKA	4
P51532	586	KKKKKKKAE	4
P51532	587	KKKKKKAEN	4
P51532	588	KKKKKAENA	4
P51532	872	HILAKIRWK	4
P51532	892	NHHCKLTQV	4
P51532	934	PTIFKSCST	4
P51532	1026	SEKDKKGKG	4
P51532	1027	EKDKKGKGG	4
P51532	1033	KGGTKTLMN	4
P51532	1219	LAAAKYKLN	4
P51532	1390	KQWLKAIEE	4
P51532	1412	KSSRKRKRD	4
P51532	1414	SRKRKRDSD	4
P51532	1441	SKKQKKRGR	4
P51532	1442	KKQKKRGRP	4
P51532	1602	KLGRKEKAQ	4
P51532	1604	GRKEKAQDR	4
Q09472	123	NSMVKSPMT	4
Q09472	277	QIQTKTVLS	4
Q09472	291	FAMDKKAVP	4
Q09472	418	CLPLKNAGD	4
Q09472	489	QVQAKNQQN	4
Q09472	614	AYARKVEGD	4
Q09472	1046	GQSKKKIFK	4
Q09472	1105	TIKRKLDTG	4
Q09472	1167	CCGRKLEFS	4
Q09472	1278	GCLKKSART	4
Q09472	1291	KFSAKRLPS	4
Q09472	1473	KMLDKAVSE	4
Q09472	1549	SKNAKKKNN	4
Q09472	1550	KNAKKKNNK	4
Q09472	1568	SRGNKKKPG	4
Q09472	1569	RGNKKKPGM	4
Q09472	1707	HKMEKLGLG	4
Q09472	1762	CQKMKRVVQ	4
Q09472	1772	TKGCKRKTN	4
Q09472	1794	CYHAKHCQE	4
Q09472	1800	CQENKCPVP	4
P04637	372	HLKSKKGQS	4
Q9UNE7	7	GKEEKEGGA	4
Q9UNE7	95	GQSVKAHFF	4
Q9UNE7	143	LRIAKKKRW	4
Q9UNE7	203	CIEAKHDKY	4
Q9UNE7	221	QVDEKRKKR	4
Q9UNE7	287	NLAMKEVID	4
Q99750	129	KAHRKLQTH	4
Q99750	149	KSSSKSTTS	4
Q9P1T7	36	GKCDKDNTE	4
O94953	91	NIQKKAMTV	4
O94953	252	PIILKKYGI	4
O94953	311	CTCRKDMVK	4
O94953	366	RASLKAKLL	4
O94953	376	RSHRKRSQP	4
O94953	451	PTKAKSERK	4
O94953	455	KSERKKKSF	4
O94953	457	ERKKKSFGL	4
O94953	588	RMETKARAG	4
O94953	672	QAERKFNAA	4
O94953	762	IACGKCCLQ	4
O94953	861	KRMKKVSGA	4
O94953	1019	QLTVKRGDI	4
O94953	1056	GEEAKAAKR	4
P55317	160	GGDAKTFKR	4
P55317	237	RSPDKPGKG	4
P55317	267	QKRFKCEKQ	4
P55317	316	GVHGKTGQL	4
P55317	418	KLDFKAYEQ	4
P14859	73	NVQSKSNEE	4
P14859	293	EQFAKTFKQ	4
P14859	381	SRRRKKRTS	4
P14859	435	RQKEKRINP	4
Q99814	18	RRKEKSRDA	4
Q99814	29	CRRSKETEV	4
Q99814	150	NLSLKNGSG	4
Q99814	312	RMLAKHGGY	4
Q99814	685	TRSAKGFGA	4
Q99814	709	KLKLKRQLE	4
Q99814	738	HLMWKRMKN	4
Q9HAZ2	9	ARARKLAKS	4
Q9HAZ2	103	WAKRKMEAG	4
Q9HAZ2	424	RTQIKCKDC	4
Q9HAZ2	641	KGKGKSAEG	4
Q9HAZ2	702	SIAEKYFGP	4
Q9HAZ2	714	GMQEKKLGS	4
Q9HAZ2	752	NLLVKAEPK	4
Q9HAZ2	756	KAEPKSPRD	4
Q9HAZ2	763	RDALKVGGP	4
Q9HAZ2	1137	SLAGKSQDD	4
Q9HAZ2	1230	CRQAKNQAY	4
Q9HAZ2	1259	DAWLKVTGA	4
O14497	51	RGEMKAAAG	4
O14497	893	GMNRKTQET	4
O14497	984	KMNNKADGT	4
O14497	994	KTESKSKKS	4
O14497	1034	FTEEKAMGM	4
O14497	1059	YVSVKEIGG	4
O14497	1615	MKMQKAGPP	4
O14497	1662	RLTMKDIGT	4
O14497	1979	DSLAKRCVC	4
Q92925	136	RRGLKRRKM	4
Q92925	143	KMADKVLPQ	4
Q92925	185	QEAIKKPLT	4
Q92925	248	KQKRKFSSF	4
Q92925	289	GFQVKRPGD	4
Q92925	297	DLNVKCTLL	4
Q92925	514	HIFAKVQQR	4
P17252	23	RFARKGALR	4
P17252	76	FVVHKRCHE	4
P17252	131	HQGMKCDTC	4
P17252	165	RIYLKAEVA	4
P17252	213	KQKTKTIRS	4
P17252	347	MVLGKGSFG	4
P17252	359	LADRKGTEE	4
P22694	8	AATAKKGSE	4
P22694	64	LVKHKATEQ	4
P22694	77	KILDKQKVV	4
P22694	190	FGFAKRVKG	4
P22694	250	QIYEKIVSG	4
P22694	346	EKCAKEFGE	4
P22612	22	EFLAKARGD	4
P22612	190	FGFAKRVKG	4
P22612	250	QIYEKIVSG	4
P10644	130	AALAKAIEK	4
P10644	218	TVKAKTNVK	4
P10644	222	KTNVKLWGI	4
P13861	135	QEACKDILL	4
P13861	247	KNNAKKRKM	4
P31321	32	QQVLKDCIV	4
P31321	130	TALAKAISK	4
P31321	218	TVKAKTDLK	4
P31321	222	KTDLKLWGI	4
P31323	150	QEACKDILL	4
P31323	204	DIYVKCDGV	4
P31323	262	KNNAKKRKM	4
P31323	330	KRKGKSEVE	4
O60674	191	MRIAKENDQ	4
O60674	217	CIRAKIQDY	4
O60674	227	ILTRKRIRY	4
O60674	244	FSQCKATAR	4
O60674	497	FQFTKCCPP	4
O60674	506	KPKDKSNLL	4
O60674	558	GTFTKIFKG	4
O60674	677	NVCAKNILL	4
O60674	736	LATDKWSFG	4
O60674	857	QQLGKGNFG	4
O60674	882	VVAVKKLQH	4
O60674	926	RRNLKLIME	4
P40763	153	QDVRKRVQD	4
P40763	180	YKTLKSQGD	4
P40763	282	RQQIKKLEE	4
P40763	365	QLKIKVCID	4
P40763	370	VCIDKDSGD	4
P40763	531	TLAEKLLGP	4
P40763	548	ITWAKFCKE	4
P40763	551	AKFCKENMA	4
P52597	72	KMALKKDRE	4
P05412	56	HLRAKNSDL	4
P05412	268	IAASKCRKR	4
P05412	271	SKCRKRKLE	4
P05412	273	CRKRKLERI	4
P47756	53	IARDKVVGK	4
P47756	135	VILIKKAGD	4
P47756	136	ILIKKAGDG	4
P47756	142	GDGSKKIKG	4
P47756	159	EVQEKSSGR	4
P47756	181	LQTNKSGSG	4
Q16633	5	MLWQKPTAP	4
Q16633	35	LLRRKRGHA	4
P08151	76	RSAVKLTKK	4
P08151	80	KLTKKRALS	4
P08151	189	MLVGKCREE	4
P08151	302	EKPHKCTFE	4
P08151	329	HTGEKPYMC	4
P08151	658	VQRFKSLGC	4
P08151	794	YPGPKALGG	4
P08151	815	QVQVKPEQG	4
P08151	929	YQSPKFLGG	4
O75582	68	FLVRKISGH	4
O75582	84	MKVLKKATI	4
O75582	273	RRILKSEPP	4
O75582	300	KDPKKRLGC	4
O75582	430	DLKDKPLGE	4
O75582	442	SICRKCVHK	4
O75582	446	KCVHKKSNQ	4
O75582	447	CVHKKSNQA	4
O75582	459	KIISKRMEA	4
O75582	513	RIKKKKHFS	4
O75582	580	NQPLKTPCF	4
O75582	642	MKKIKKGDF	4
O75582	677	NKRLKMSGL	4
O75582	737	QNVDKAPLA	4
O75582	748	RKMKKTSTS	4
O75582	773	HSHGKTTPT	4
P42224	85	HNIRKSKRN	4
P42224	152	NVKDKVMCI	4
P42224	189	NGVAKSDQK	4
P42224	200	QLLLKKMYL	4
P42224	209	MLDNKRKEV	4
P42224	278	RQQLKKLEE	4
P42224	525	MLGEKLLGP	4
P42224	550	NINDKNFPF	4
P55072	231	PALFKAIGV	4
P55072	312	AIAPKREKT	4
P55072	315	PKREKTHGE	4
P55072	529	TLLAKAIAN	4
P55072	565	EIFDKARQA	4
P55072	677	EFLAKMTNG	4
P55072	754	NDIRKYEMF	4
P49368	15	SQNTKRESG	4
P49368	31	INAAKTIAD	4
P49368	128	SAYRKALDD	4
P49368	203	ARVEKIPGG	4
P49368	353	LLEIKKIGD	4
P49368	469	SLRAKHTQE	4
P51114	122	NKTVKKNTF	4
P51114	123	KTVKKNTFF	4
P51114	152	KDFKKAVGA	4
P51114	273	ADAVKKARG	4
P51114	274	DAVKKARGF	4
P51114	295	NLVGKVIGK	4
P51114	310	EIVDKSGVV	4
P51114	562	LAKNKKEMA	4
P51114	578	GPSEKAING	4
P03372	8	TLHTKASGM	4
P03372	171	STNDKGSMA	4
P03372	180	MESAKETRY	4
P03372	206	CEGCKAFFK	4
P03372	210	KAFFKRSIQ	4
P03372	231	CTIDKNRRK	4
P03372	257	GGIRKDRRG	4
P03372	268	MLKHKRQRD	4
P03372	362	INWAKRVPG	4
P03372	416	RNQGKCVEG	4
Q03164	174	TSPRKPRGR	3
Q03164	205	KSETKSGDK	3
Q03164	209	KSGDKIKKK	3
Q03164	211	GDKIKKKDS	3
Q03164	212	DKIKKKDSK	3
Q03164	213	KIKKKDSKS	3
Q03164	221	SIEKKRGRP	3
Q03164	271	ATKIKKLRA	3
Q03164	272	TKIKKLRAG	3
Q03164	277	LRAGKLSPL	3
Q03164	284	PLKSKFKTG	3
Q03164	286	KSKFKTGKL	3
Q03164	289	FKTGKLQIG	3
Q03164	313	TERIKTPSG	3
Q03164	334	VRKDKEGTP	3
Q03164	365	IPSSKRTDA	3
Q03164	373	ATIAKQLLQ	3
Q03164	386	GAQKKIEKE	3
Q03164	389	KKIEKEAAQ	3
Q03164	398	LQGRKVKTQ	3
Q03164	404	KTQVKNIRQ	3
Q03164	423	SRIIKTPRR	3
Q03164	461	GSSEKSSAA	3
Q03164	544	SRTTKKLST	3
Q03164	545	RTTKKLSTL	3
Q03164	639	AKYAKEGLI	3
Q03164	735	VSNRKRKRK	3
Q03164	872	VEKDKSRER	3
Q03164	885	EKENKRESR	3
Q03164	890	RESRKEKRK	3
Q03164	913	GRVSKEKVV	3
Q03164	964	ILIKKGRGN	3
Q03164	971	GNLEKTNLD	3
Q03164	1021	PMTDKRVAS	3
Q03164	1029	SLLKKAKAQ	3
Q03164	1036	AQLCKIEKS	3
Q03164	1044	SKSLKQTDQ	3
Q03164	1050	TDQPKAQGQ	3
Q03164	1139	VTRNKAPQE	3
Q03164	1186	RNIKKQCCK	3
Q03164	1221	EKKSKTSEK	3
Q03164	1229	KKDSKESSV	3
Q03164	1255	DPAPKKSSS	3
Q03164	1256	PAPKKSSSE	3
Q03164	1296	RKSSKQVSQ	3
Q03164	1317	GPPRKEVPK	3
Q03164	1345	QSKQKKVAP	3
Q03164	1360	KQKPKEKEK	3
Q03164	1406	RVDFKEDCE	3
Q03164	1517	NYPTKPTKK	3
Q03164	1520	TKPTKKKKV	3
Q03164	1521	KPTKKKKVW	3
Q03164	1522	PTKKKKVWI	3
Q03164	1529	WICTKCVRC	3
Q03164	1561	HDCAKLFAK	3
Q03164	1598	WVHSKCENL	3
Q03164	1645	QISLKQVLT	3
Q03164	1712	LEGVKRKMD	3
Q03164	1748	QPEIKKANS	3
Q03164	1755	NSMVKSFFI	3
Q03164	1828	IPAPKPKGP	3
Q03164	2043	DCEDKLFPI	3
Q03164	2141	HVISKVPRI	3
Q03164	2299	DLVSKSSSL	3
Q03164	2307	LKGEKTKVL	3
Q03164	2400	DTEVKTLKL	3
Q03164	2403	VKTLKLSGM	3
Q03164	2444	KHSSKSFLE	3
Q03164	2540	KNALKESSP	3
Q03164	2654	SSTGKKRGK	3
Q03164	2655	STGKKRGKR	3
Q03164	2769	EHVTKSSVG	3
Q03164	2790	VSRVKTQGQ	3
Q03164	2965	TITEKSVAS	3
Q03164	3101	GVTQKIQLT	3
Q03164	3230	LQTRKNKKL	3
Q03164	3232	TRKNKKLAP	3
Q03164	3233	RKNKKLAPS	3
Q03164	3290	IKRSKSSIM	3
Q03164	3539	KPKPKTKRF	3
Q03164	3541	KPKTKRFQL	3
Q03164	3549	LPLDKGNGK	3
Q03164	3553	KGNGKKHKV	3
Q03164	3556	GKKHKVSHL	3
Q03164	3633	SAEPKTVEE	3
Q03164	3657	EQKRKESIT	3
Q03164	3663	SITEKKPKK	3
Q03164	3664	ITEKKPKKG	3
Q03164	3666	EKKPKKGLV	3
Q03164	3667	KKPKKGLVF	3
Q03164	3691	EDAWKSLTD	3
Q03164	3696	SLTDKVQEA	3
Q03164	3707	NARLKQLSF	3
Q03164	3738	LSGAKHCRN	3
Q03164	3744	CRNYKFRFH	3
Q03164	3772	VHLRKSAFD	3
Q03164	3784	FLASKHRQP	3
Q03164	3804	EVQLKSARR	3
Q03164	3825	RHLKKTSKE	3
Q9Y4C1	74	ESWRKRRWI	3
Q9Y4C1	168	QIVSKEFQA	3
Q9Y4C1	261	IGAVKRKSS	3
Q9Y4C1	365	PDVCKAGLL	3
Q9Y4C1	511	APSRKSVLT	3
Q9Y4C1	521	PAKLKKLQQ	3
Q9Y4C1	545	AQLPKCREC	3
Q9Y4C1	558	LRKDKEQQK	3
Q9Y4C1	637	VISEKEAMS	3
Q9Y4C1	691	CYRMKRKNC	3
Q9Y4C1	711	LKCVKSQIH	3
Q9Y4C1	729	IIPGKALYD	3
Q9Y4C1	744	SVRAKWGIK	3
Q9Y4C1	748	KWGIKANCP	3
Q9Y4C1	759	NRQFKLFSK	3
Q9Y4C1	763	KLFSKPASK	3
Q9Y4C1	767	KPASKEDLK	3
Q9Y4C1	771	KEDLKQTSL	3
Q9Y4C1	837	NKENKEKQP	3
Q9Y4C1	851	KNEIKCLPP	3
Q9Y4C1	895	SSTGKTENG	3
Q9Y4C1	925	SDLSKRPQG	3
Q9Y4C1	933	GLTIKPSIL	3
Q9Y4C1	984	GVHHKLNSE	3
Q9Y4C1	997	ESFRKEFGE	3
Q9Y4C1	1038	LKNEKEPMV	3
Q9Y4C1	1080	RRDGKLNLA	3
Q9Y4C1	1161	ELTIKRFIE	3
Q9Y4C1	1167	FIEGKEKPG	3
Q9Y4C1	1190	REFLKKVSE	3
Q9Y4C1	1293	NHEDKLQVK	3
Q9Y4C1	1297	KLQVKNVIY	3
Q9Y4C1	1312	VAMLKASES	3
Q9Y2Z0	70	ADAKKSLEL	3
Q9Y2Z0	211	SALVKLPSG	3
Q9Y2Z0	245	KIEIKLKKP	3
Q9Y2Z0	247	EIKLKKPEA	3
Q9Y2Z0	256	VRWEKLEGQ	3
Q9Y2Z0	302	EKNEKLEGD	3
Q9Y2Z0	325	SDEVKRAMN	3
Q12931	67	TAEDKEEPL	3
Q12931	130	KLRHKLVSD	3
Q12931	151	TNAEKGTIT	3
Q12931	181	RSGSKAFLD	3
Q12931	196	EASSKIIGQ	3
Q12931	252	RTGTKIIIH	3
Q12931	258	IIHLKSDCK	3
Q12931	262	KSDCKEFSS	3
Q12931	332	TLHYKTDAP	3
Q12931	413	ALIRKLRDV	3
Q12931	424	QRLIKFFID	3
Q12931	436	KDAEKYAKF	3
Q12931	439	EKYAKFFED	3
Q12931	518	YEAMKKKDT	3
Q12931	519	EAMKKKDTE	3
Q12931	598	VTNVKVTLR	3
Q12931	699	ELLVKALER	3
P07900	58	DALDKIRYE	3
P07900	185	GRGTKVILH	3
P07900	208	KEIVKKHSQ	3
P07900	228	KERDKEVSD	3
P07900	241	EKEDKEEEK	3
P07900	269	EEEEKKDGD	3
P07900	276	GDKKKKKKI	3
P07900	277	DKKKKKKIK	3
P07900	279	KKKKKIKEK	3
P07900	281	KKKIKEKYI	3
P07900	283	KIKEKYIDQ	3
P07900	314	GEFYKSLTN	3
P07900	356	FENRKKKNN	3
P07900	358	NRKKKNNIK	3
P07900	431	LAEDKENYK	3
P07900	435	KENYKKFYE	3
P07900	478	MVSLKDYCT	3
P07900	485	CTRMKENQK	3
P07900	513	ERLRKHGLE	3
P07900	534	VQQLKEFEG	3
P07900	565	QEEKKTKFE	3
P07900	576	CKIMKDILE	3
P07900	581	DILEKKVEK	3
P07900	585	KKVEKVVVS	3
P07900	615	ERIMKAQAL	3
P07900	649	TLRQKAEAD	3
P07900	654	AEADKNDKS	3
P07900	693	YRMIKLGLG	3
P08238	53	DALDKIRYE	3
P08238	72	GKELKIDII	3
P08238	142	LVAEKVVVI	3
P08238	180	GRGTKVILH	3
P08238	203	KEVVKKHSQ	3
P08238	265	SGKDKKKKT	3
P08238	268	DKKKKTKKI	3
P08238	271	KKTKKIKEK	3
P08238	275	KIKEKYIDQ	3
P08238	306	GEFYKSLTN	3
P08238	350	NKKKKNNIK	3
P08238	423	LAEDKENYK	3
P08238	427	KENYKKFYE	3
P08238	481	KETQKSIYY	3
P08238	526	VQQLKEFDG	3
P08238	550	DEEEKKKME	3
P08238	557	MEESKAKFE	3
P08238	568	CKLMKEILD	3
P08238	607	ERIMKAQAL	3
P08238	623	YMMAKKHLE	3
P08238	624	MMAKKHLEI	3
P08238	641	TLRQKAEAD	3
P08238	646	AEADKNDKA	3
P08238	652	DKAVKDLVV	3
P08238	685	YRMIKLGLG	3
P0DMV8	77	LIGRKFGDP	3
P0DMV8	100	NDGDKPKVQ	3
P0DMV8	108	QVSYKGETK	3
P0DMV8	112	KGETKAFYP	3
P0DMV8	126	MVLTKMKEI	3
P0DMV8	251	RKHKKDISQ	3
P0DMV8	325	LRDAKLDKA	3
P0DMV8	361	RDLNKSINP	3
P0DMV8	384	LMGDKSENV	3
P0DMV8	415	TALIKRNST	3
P0DMV8	423	TIPTKQTQI	3
P0DMV8	451	RAMTKDNNL	3
P0DMV8	497	KSTGKANKI	3
P0DMV8	507	ITNDKGRLS	3
P0DMV8	512	GRLSKEEIE	3
P0DMV8	524	QEAEKYKAE	3
P0DMV8	561	GLKGKISEA	3
P0DMV8	568	EADKKKVLD	3
P0DMV8	589	TLAEKDEFE	3
P0DMV8	628	AQGPKGGSG	3
P0DMV9	77	LIGRKFGDP	3
P0DMV9	100	NDGDKPKVQ	3
P0DMV9	108	QVSYKGETK	3
P0DMV9	112	KGETKAFYP	3
P0DMV9	126	MVLTKMKEI	3
P0DMV9	251	RKHKKDISQ	3
P0DMV9	325	LRDAKLDKA	3
P0DMV9	361	RDLNKSINP	3
P0DMV9	384	LMGDKSENV	3
P0DMV9	415	TALIKRNST	3
P0DMV9	423	TIPTKQTQI	3
P0DMV9	451	RAMTKDNNL	3
P0DMV9	497	KSTGKANKI	3
P0DMV9	507	ITNDKGRLS	3
P0DMV9	512	GRLSKEEIE	3
P0DMV9	524	QEAEKYKAE	3
P0DMV9	561	GLKGKISEA	3
P0DMV9	568	EADKKKVLD	3
P0DMV9	589	TLAEKDEFE	3
P0DMV9	628	AQGPKGGSG	3
P12004	13	GSILKKVLE	3
P12004	138	SCVVKMPSG	3
P12004	254	YLAPKIEDE	3
P11142	108	QVEYKGETK	3
P11142	112	KGETKSFYP	3
P11142	126	MVLTKMKEI	3
P11142	188	GLDKKVGAE	3
P11142	246	IAEFKRKHK	3
P11142	251	RKHKKDISE	3
P11142	325	LRDAKLDKS	3
P11142	361	KELNKSINP	3
P11142	384	LSGDKSENV	3
P11142	415	TVLIKRNTT	3
P11142	423	TIPTKQTQT	3
P11142	451	RAMTKDNNL	3
P11142	458	NLLGKFELT	3
P11142	507	ITNDKGRLS	3
P11142	512	GRLSKEDIE	3
P11142	524	QEAEKYKAE	3
P11142	539	KVSSKNSLE	3
P11142	550	AFNMKATVE	3
P11142	561	KLQGKINDE	3
P11142	567	NDEDKQKIL	3
P11142	583	NWLDKNQTA	3
P11142	601	KELEKVCNP	3
P62424	20	PAVVKKQEA	3
P62424	26	QEAKKVVNP	3
P62424	34	PLFEKRPKN	3
P62424	37	EKRPKNFGI	3
P62424	48	DIQPKRDLT	3
P62424	72	AILYKRLKV	3
P62424	110	TKQEKKQRL	3
P62424	111	KQEKKQRLL	3
P62424	131	DVPTKRPPV	3
P62424	150	LVENKKAQL	3
P62424	176	ALCRKMGVP	3
P62424	212	NSEDKGALA	3
P62424	245	VLGPKSVAR	3
P62424	252	ARIAKLEKA	3
P62424	255	AKLEKAKAK	3
P62424	257	LEKAKAKEL	3
P62424	264	ELATKLG	3
P15880	54	ARGGKAEDK	3
P15880	71	GRLVKDMKI	3
P15880	103	GASLKDEVL	3
P15880	114	MPVQKQTRA	3
P15880	159	IILAKLSIV	3
P15880	176	NKIGKPHTV	3
P15880	212	PVPKKLLMM	3
P15880	246	DAISKTYSY	3
P15880	263	TVFTKSPYQ	3
P31689	23	QEELKKAYR	3
P31689	59	LSDAKKREL	3
P31689	60	SDAKKRELY	3
P31689	66	ELYDKGGEQ	3
P31689	190	RISPKDRCK	3
P31689	200	CNGRKIVRE	3
P31689	205	IVREKKILE	3
P31689	221	KDGQKITFH	3
P31689	296	GQIVKHGDI	3
P31689	301	HGDIKCVLN	3
O95816	132	LGNAKSHLM	3
O95816	186	ENSDKAIKL	3
O95816	189	DKAIKLLEH	3
O60884	26	NELKKAYRK	3
O60884	131	LYNGKTTKL	3
O60884	134	GKTTKLQLS	3
O60884	212	KKVIKEVKI	3
O60884	287	QFTFKHLDG	3
P62701	6	ARGPKKHLK	3
P62701	62	GDEVKKICM	3
P62701	63	DEVKKICMQ	3
P62701	75	KIDGKVRTD	3
P62701	94	ISIDKTGEN	3
P62701	122	EAKYKLCKV	3
P62701	125	YKLCKVRKI	3
P62701	211	VVHVKDANG	3
P62701	233	GKGNKPWIS	3
P62701	254	EERDKRLAA	3
Q99598	14	FRKRKHDNF	3
Q99598	27	RREGKDVNS	3
Q99598	52	ARHDKYERL	3
Q99598	100	GVRQKIFQV	3
Q99598	138	QHFIKTRSL	3
Q99598	252	QSLAKVENA	3
Q99598	279	VFSVKTEMI	3
P68032	63	EAQSKRGIL	3
P68032	115	PLNPKANRE	3
P68032	217	DIKEKLCYV	3
P68032	286	NSIMKCDID	3
P10275	143	VAASKGLPQ	3
P10275	291	LAECKGSLL	3
P10275	318	GGYTKGLEG	3
P10275	388	HARIKLENP	3
P10275	558	FPPQKTCLI	3
P10275	581	CGSCKVFFK	3
P10275	631	LGARKLKKL	3
P10275	634	RKLKKLGNL	3
P10275	659	ETTQKLTVS	3
P10275	809	FLCMKALLL	3
P10275	848	ACKRKNPTS	3
P10275	906	VQVPKILSG	3
Q8N6H7	24	VPTNKACFD	3
Q8N6H7	32	DCGAKNPSW	3
Q8N6H7	149	HSPEKKDSD	3
Q8N6H7	209	SLELKSSII	3
Q8N6H7	215	SIIGKKKPA	3
Q8N6H7	216	IIGKKKPAA	3
Q8N6H7	229	LGAKKGLGA	3
Q8N6H7	387	RVEEKEPEV	3
Q8N6H7	424	EARQKFAGA	3
Q8N6H7	502	SVAGKMAVL	3
P56211	20	EMEDKVTSP	3
P56211	33	EAKLKARYP	3
P56211	51	DFLRKRLQK	3
P56211	55	KRLQKGQKY	3
P56211	58	QKGQKYFDS	3
P56211	73	KAKMKNKQL	3
P35226	8	TTRIKITEL	3
P35226	62	VQVHKTRPL	3
P35226	81	DIVYKLVPG	3
P35226	92	KNEMKRRRD	3
P35226	122	ADEDKRIIT	3
P35226	149	RKVNKDKEK	3
P35226	153	KDKEKSKEE	3
P35226	177	MHLRKFLRS	3
P35226	235	CKRMKISHQ	3
P35226	257	SGSDKANSP	3
O60885	76	KTLWKHQFA	3
O60885	111	MGTIKKRLE	3
O60885	285	PVKTKKGVK	3
O60885	314	PPEPKTTKL	3
O60885	332	VKPPKKDVP	3
O60885	346	PAPEKSSKV	3
O60885	367	EMFAKKHAA	3
O60885	368	MFAKKHAAY	3
O60885	395	CDIIKHPMD	3
O60885	404	MSTIKSKLE	3
O60885	445	AMARKLQDV	3
O60885	519	QEQLKAVHE	3
O60885	537	QNKPKKKEK	3
O60885	541	KKKEKDKKE	3
O60885	546	DKKEKKKEK	3
O60885	550	KKKEKHKRK	3
O60885	552	KEKHKRKEE	3
O60885	554	KHKRKEEVE	3
O60885	566	KSKAKEPPP	3
O60885	571	EPPPKKTKK	3
O60885	574	PKKTKKNNS	3
O60885	575	KKTKKNNSS	3
O60885	586	NVSKKEPAP	3
O60885	592	PAPMKSKPP	3
O60885	606	EEEDKCKPM	3
O60885	685	PQAEKVDVI	3
O60885	724	EMAPKSKKK	3
O60885	726	APKSKKKGH	3
O60885	727	PKSKKKGHP	3
O60885	728	KSKKKGHPG	3
O60885	794	APAMKSSPP	3
O60885	937	QQLQKVQPP	3
O60885	1035	PQPAKPQQV	3
O60885	1050	PRHHKSDPY	3
O60885	1195	KKDLKIKNM	3
O60885	1197	DLKIKNMGS	3
O60885	1218	SSTAKSSSD	3
Q14781	60	LAFQKKEHE	3
Q14781	103	DAPSKSKSS	3
Q14781	145	PVPQKKAQI	3
Q14781	153	ILVAKPELK	3
Q14781	163	PIRKKRGRK	3
Q14781	174	PPEQKATRR	3
Q14781	187	AKVLKTARK	3
Q14781	291	GLDLKVRTQ	3
Q14781	296	VRTQKGELG	3
Q14781	362	LQSVKNGMP	3
Q14781	379	ATATKGVPA	3
Q14781	427	TPASKRDCV	3
Q14781	494	SQDWKPTRS	3
O00257	19	SIEKKRIRK	3
O00257	75	KRGPKPKPL	3
O00257	106	DNRAKLDLG	3
O00257	125	ELNSKKHHQ	3
O00257	135	QPHSKERAG	3
O00257	140	ERAGKPPPP	3
O00257	149	GKSGKYYYQ	3
O00257	212	LGAVKPLAG	3
O00257	223	GAPGKGSEK	3
O00257	238	MPAPKEAVT	3
O00257	249	GIGGKMKIV	3
O00257	254	MKIVKNKNK	3
O00257	256	IVKNKNKNG	3
O00257	280	AVKIKSGEV	3
O00257	326	EAPPKRREE	3
O00257	365	QLTTKPDLL	3
O00257	479	LRCVKTRSE	3
O00257	517	TTAEKPPAE	3
Q9Y3E7	10	KTQEKPPKE	3
Q9Y3E7	25	LKIRKEMRV	3
Q9Y3E7	49	KRSVKDAAK	3
Q9Y3E7	54	DAAKKGQKD	3
Q9Y3E7	57	KKGQKDVCI	3
Q9Y3E7	65	IVLAKEMIR	3
Q9Y3E7	76	KAVSKLYAS	3
Q9Y3E7	132	RELSKEMMK	3
Q9Y3E7	136	KEMMKAGII	3
Q96FZ7	8	LFGRKKQSR	3
Q96FZ7	18	TEQDKAILQ	3
Q96FZ7	57	RDGRKERAK	3
Q96FZ7	61	KERAKLLLK	3
Q96FZ7	66	LLLKKKRYQ	3
Q96FZ7	67	LLKKKRYQE	3
P33316	212	KFEVKKGDR	3
Q5VYK3	38	NIISKFLPP	3
Q5VYK3	57	GVRKKVMEL	3
Q5VYK3	285	DLELKSKQS	3
Q5VYK3	321	GAVLKPELK	3
Q5VYK3	325	KPELKRDPV	3
Q5VYK3	336	RVKLKIVPH	3
Q5VYK3	370	NTNSKLRTL	3
Q5VYK3	392	EIKIKPLGP	3
Q5VYK3	436	HLFTKDIAL	3
Q5VYK3	450	EALCKEEPE	3
Q5VYK3	567	YIQEKASHR	3
Q5VYK3	699	TEWIKSLMN	3
Q5VYK3	706	MNNSKEEMR	3
Q5VYK3	730	GNELKSMIE	3
Q5VYK3	768	LAKKKMRMS	3
Q5VYK3	892	SVEAKQIEL	3
Q5VYK3	934	PAGAKVNDV	3
Q5VYK3	972	SLVRKLSTH	3
Q5VYK3	1039	GKRVKHEVS	3
Q5VYK3	1201	DIIDKLPEI	3
Q5VYK3	1222	ESVRKAAEL	3
Q5VYK3	1280	NTLVKISKS	3
Q5VYK3	1290	GAMLKPHAP	3
Q5VYK3	1324	TEQEKAAMD	3
Q5VYK3	1376	GLGTKGGCA	3
Q5VYK3	1479	KNHAKEVLP	3
Q5VYK3	1534	TITQKALQS	3
Q5VYK3	1544	SWKMKAQGA	3
Q5VYK3	1556	ASIAKQTSS	3
Q5VYK3	1632	NVKYKIVAI	3
Q5VYK3	1644	ADILKATKE	3
Q5VYK3	1647	LKATKEDRF	3
Q5VYK3	1719	QELCKLMCE	3
Q5VYK3	1769	LETCKSITY	3
Q5VYK3	1778	SLENKTYSS	3
Q5VYK3	1796	ELLLKKLEE	3
Q5VYK3	1833	ELQEKAALL	3
Q5VYK3	1839	ALLKKTLEN	3
Q15056	120	AEGRKQDKG	3
Q15056	214	RLQLKPRTV	3
O00321	51	ETCWKGTSS	3
O00321	207	TTSLKRYQS	3
O00321	234	ARCPKTNHR	3
O00321	294	MNYEKLSRG	3
O00321	315	SGGRKYTYR	3
P22102	20	TLAWKLAQS	3
P22102	63	AQFCKEKKI	3
P22102	65	FCKEKKIEF	3
P22102	66	CKEKKIEFV	3
P22102	125	TAQWKAFTK	3
P22102	129	KAFTKPEEA	3
P22102	156	LAAGKGVIV	3
P22102	178	IMQEKAFGA	3
P22102	207	FTDGKTVAP	3
P22102	219	AQDHKRLLE	3
P22102	251	LLKIKDTVL	3
P22102	342	VMASKGYPG	3
P22102	404	LEEAKKGLA	3
P22102	438	SLTYKESGV	3
P22102	452	NMLVKKIQP	3
P22102	453	MLVKKIQPL	3
P22102	480	LFDLKAAGF	3
P22102	499	GVGTKLKIA	3
P22102	501	GTKLKIAQL	3
P22102	508	QLCNKHDTI	3
P22102	629	SLVRKIVAK	3
P22102	779	RVKVKNLIE	3
P22102	844	VISNKAAVA	3
P22102	852	AGLDKAERA	3
P22102	869	HKLYKNRVE	3
P22102	964	AVPVKRGDT	3
P22102	1003	GENGKICWV	3
Q13630	25	KAIQKVVAD	3
Q13630	108	VGARKVVSC	3
Q13630	147	YSYAKRMID	3
Q13630	194	GLIHKVHLA	3
Q13630	275	FDTTKSDGQ	3
Q13630	281	DGQFKKTAS	3
P68431	15	STGGKAPRK	3
P68431	65	LLIRKLPFQ	3
P68431	80	AQDFKTDLR	3
Q16665	56	SHLDKASVM	3
Q16665	71	LRVRKLLDA	3
Q16665	85	EDDMKAQMN	3
Q16665	156	NGLVKKGKE	3
Q16665	157	GLVKKGKEQ	3
Q16665	214	CGYKKPPMT	3
Q16665	240	PLDSKTFLS	3
Q16665	377	QLFTKVESE	3
Q16665	389	SLFDKLKKE	3
Q16665	477	EVALKLEPN	3
Q16665	547	DTEAKNPFS	3
Q16665	682	EQTEKSHPR	3
Q16665	756	WKRVKGCKS	3
Q16665	769	GMEQKTIIL	3
Q7Z6Z7	10	TKLKKTPTE	3
Q7Z6Z7	25	ALIDKLKVC	3
Q7Z6Z7	42	LQQIKTWNI	3
Q7Z6Z7	143	YVFSKRSNY	3
Q7Z6Z7	211	GAEVKIEKR	3
Q7Z6Z7	231	EQLDKISES	3
Q7Z6Z7	272	SNHRKRLQA	3
Q7Z6Z7	417	LKVIKFLGD	3
Q7Z6Z7	509	AALLKSMLN	3
Q7Z6Z7	517	NFLKKAIQD	3
Q7Z6Z7	674	QPTLKTDAT	3
Q7Z6Z7	696	GRDPKYICQ	3
Q7Z6Z7	706	PSIQKADGT	3
Q7Z6Z7	829	AGVCKSILT	3
Q7Z6Z7	977	KLVPKDEKA	3
Q7Z6Z7	980	PKDEKAGTT	3
Q7Z6Z7	1037	KGKSKITPA	3
Q7Z6Z7	1111	KLLTKGLSW	3
Q7Z6Z7	1208	MLVEKMVNP	3
Q7Z6Z7	1247	VVTQKAAFT	3
Q7Z6Z7	1293	ERLSKEKEG	3
Q7Z6Z7	1403	VACRKEEEE	3
Q7Z6Z7	1409	EEERKAREK	3
Q7Z6Z7	1413	KAREKQEEE	3
Q7Z6Z7	1420	EEEAKCLEK	3
Q7Z6Z7	1424	KCLEKFQDA	3
Q7Z6Z7	1497	DVLIKAALP	3
Q7Z6Z7	1559	NVLIKLLEV	3
Q7Z6Z7	1601	AISSKRRAQ	3
Q7Z6Z7	1643	DSAWKSGET	3
Q7Z6Z7	1702	QELEKTLEE	3
Q7Z6Z7	1718	RKENKGNDT	3
Q7Z6Z7	1790	TRDHKYAMM	3
Q7Z6Z7	1840	HTMEKVVRS	3
Q7Z6Z7	1917	NLRIKGPNA	3
Q7Z6Z7	2043	SRDGKKDKE	3
Q7Z6Z7	2044	RDGKKDKEG	3
Q7Z6Z7	2060	KQKGKGSKP	3
Q7Z6Z7	2157	VNEVKAALG	3
Q7Z6Z7	2692	ERREKRRKQ	3
Q7Z6Z7	2695	EKRRKQLAE	3
Q7Z6Z7	2759	TSESKETLG	3
Q7Z6Z7	3254	EKGKKSSKS	3
Q7Z6Z7	3278	KMESKSSNQ	3
Q7Z6Z7	3310	SGGRKHTEK	3
Q7Z6Z7	3314	KHTEKHASG	3
Q7Z6Z7	3345	IQLAKVFPS	3
Q7Z6Z7	3409	KNSVKSVPV	3
Q7Z6Z7	3554	TKGSKSPAK	3
Q7Z6Z7	3675	PQTTKLKGK	3
Q7Z6Z7	3677	TTKLKGKMQ	3
Q7Z6Z7	3679	KLKGKMQSR	3
Q7Z6Z7	3999	DVKRKYFRQ	3
Q7Z6Z7	4014	EGLRKEDMA	3
Q7Z6Z7	4134	RSFYKHILG	3
Q7Z6Z7	4190	VRDLKPNGA	3
Q7Z6Z7	4236	EIIPKRLIS	3
Q8IU81	56	ARQLKRSHV	3
Q8IU81	78	HPATKDLAA	3
Q8IU81	227	HGRPKAVRE	3
Q8IU81	248	VRFKKDHGL	3
Q8IU81	306	REPGKALAS	3
Q8IU81	427	IAALKNVAE	3
Q8IU81	551	PSGDKCPLV	3
Q8IU81	579	DIKVKKERD	3
O15054	168	QHRAKVLPP	3
O15054	198	GPPVKRAAE	3
O15054	228	SPGGKRRRG	3
O15054	295	GPERKGSAP	3
O15054	651	GPLSKAPQP	3
O15054	769	QEEEKKPPP	3
O15054	973	SGSCKRRQK	3
O15054	977	KRRQKEHQK	3
O15054	1004	EGRAKAKAK	3
O15054	1033	QGREKSRPD	3
O15054	1072	SVPGKKARE	3
O15054	1109	IRLIKVESG	3
O15054	1115	ESGDKETFI	3
O15054	1152	NAKVKGKFR	3
O15054	1154	KVKGKFRES	3
O15054	1175	NTEEKLPRE	3
O15054	1193	YLESKRDAF	3
O15054	1279	TTIAKYAQY	3
O15054	1338	LSDAKRWKP	3
O15054	1509	VKNVKSIVP	3
O15054	1537	FKMIKFCLL	3
O15054	1545	LQSMKHCQV	3
O15054	1560	RAGKKIAYQ	3
Q969V6	5	MPPLKSPAA	3
Q969V6	29	YLKRKIRSR	3
Q969V6	57	SLQAKQLKL	3
Q969V6	214	QSQPKSASE	3
Q969V6	219	SASEKSQRS	3
Q969V6	224	SQRSKKAKE	3
Q969V6	227	SKKAKELKP	3
Q969V6	234	KPKVKKLKY	3
Q969V6	360	KQELKLRSL	3
Q969V6	392	PGAPKAPAA	3
Q969V6	402	SILHKAGEV	3
Q969V6	523	EGRDKDQML	3
Q969V6	530	MLQEKDKQI	3
Q969V6	532	QEKDKQIEA	3
Q969V6	544	MLRQKQQLV	3
Q969V6	576	GTPVKQENS	3
Q969V6	723	SLLKKEPPG	3
Q9ULH7	27	PLKEKECLE	3
Q9ULH7	36	GSNQKSLKE	3
Q9ULH7	39	QKSLKEVLQ	3
Q9ULH7	65	MPPLKSPAA	3
Q9ULH7	75	HEQIKSLER	3
Q9ULH7	122	QMKLKRARL	3
Q9ULH7	276	NPNDKHRSK	3
Q9ULH7	283	SKKCKDPKP	3
Q9ULH7	286	CKDPKPRVK	3
Q9ULH7	290	KPRVKKLKY	3
Q9ULH7	306	QKGEKNEPQ	3
Q9ULH7	354	PLNDKNSNS	3
Q9ULH7	559	DAAEKDRKL	3
Q9ULH7	562	EKDRKLQEK	3
Q9ULH7	566	KLQEKEKQI	3
Q9ULH7	576	ELKRKLEQE	3
Q9ULH7	615	GHSVKSDQK	3
Q9ULH7	844	NTPNKPSSP	3
Q9ULH7	867	SPVAKTKDP	3
Q9ULH7	879	EEAIKQTRS	3
Q9ULH7	908	DILIKSGEI	3
P01106	206	SSSPKSCAS	3
P01106	371	RNELKRSFF	3
P01106	392	EKAPKVVIL	3
P01106	397	VVILKKATA	3
P01106	430	QLKHKLEQL	3
Q8IZQ8	53	HEQRKHLDS	3
Q8IZQ8	59	LDSDKAKNS	3
Q8IZQ8	65	KNSLKRKAR	3
Q8IZQ8	100	QMKLKRARL	3
Q8IZQ8	138	KEAIKGNQV	3
Q8IZQ8	146	VSFSKSTDA	3
Q8IZQ8	183	PPDAKASDT	3
Q8IZQ8	222	SDAGKQGLG	3
Q8IZQ8	251	KNRHKKPKD	3
Q8IZQ8	252	NRHKKPKDP	3
Q8IZQ8	254	HKKPKDPKP	3
Q8IZQ8	261	KPKVKKLKY	3
Q8IZQ8	324	QAQLKEPNE	3
Q8IZQ8	524	MLVEKQKVI	3
Q8IZQ8	551	MQLQKQKRN	3
Q8IZQ8	553	LQKQKRNNC	3
Q8IZQ8	644	LGAVKSPQH	3
Q8IZQ8	695	HSSDKVGPK	3
Q8IZQ8	699	KVGPKFSIP	3
Q8IZQ8	709	PTFSKSSSA	3
Q8IZQ8	728	EDAVKQQMT	3
Q8IZQ8	766	QKVPKIPRS	3
Q8IZQ8	845	GFSGKAAED	3
P61218	95	LIAMKELKA	3
P36873	111	LLAYKIKYP	3
P36873	141	YDECKRRYN	3
P36873	150	IKLWKTFTD	3
P36873	211	SDPDKDVLG	3
P36873	234	EVVAKFLHK	3
P36873	260	EFFAKRQLV	3
P36873	302	PAEKKKPNA	3
O14744	51	HPRFKREFI	3
O14744	184	SGEEKTWMW	3
O14744	200	CDYSKRIAV	3
O14744	227	GEPIKAAIL	3
O14744	240	FLTNKKGFP	3
O14744	302	ELFAKGYED	3
O14744	428	VAPEKADII	3
O14744	458	QHFLKDDGV	3
O14744	609	CSNSKKVWY	3
Q6ZTQ3	49	FINEKTFIT	3
Q6ZTQ3	62	NSLLKTYNI	3
Q6ZTQ3	119	FTSMKSSDV	3
Q6ZTQ3	174	KPHAKDEPD	3
Q6ZTQ3	204	MMDRKERQK	3
Q6ZTQ3	253	QLLQKFKIE	3
Q6ZTQ3	304	FLMDKDAEE	3
Q6ZTQ3	336	NEEEKREIQ	3
Q6ZTQ3	345	RIVTKFNKE	3
Q6ZTQ3	355	AIILKCLQN	3
Q6ZTQ3	360	CLQNKLVIK	3
O43353	72	EILHKARFS	3
O43353	148	HHDLKTQNI	3
O43353	182	SRSSKSAPE	3
O43353	209	RASIKHDIY	3
O43353	226	VLSRKQPFE	3
O43353	311	IQLKKTKLQ	3
O43353	327	LCDKKKMEL	3
O43353	443	WIQSKREDI	3
O43353	480	LVSTKPTRT	3
O43353	513	LKDNKQMGL	3
Q9Y224	20	GFNCKDETE	3
Q9Y224	72	NCPFKIQDR	3
Q9Y224	131	NPDFKAGVM	3
Q9Y224	154	LVMLKAIRI	3
Q9Y224	234	IADPKTDHR	3
Q9Y224	241	HRLGKVGR	3
P42226	9	GLVSKMPPE	3
P42226	107	LQGEKKAVM	3
P42226	129	QEELKFKTG	3
P42226	131	ELKFKTGLR	3
P42226	199	ALVLKRIQI	3
P42226	205	IQIWKRQQQ	3
P42226	252	ELEPKTRAS	3
P42226	284	PQVLKTQTK	3
P42226	319	MVTEKQARE	3
P42226	383	VTEEKCAVL	3
P42226	480	FLAQKIFND	3
P42226	526	LDLTKRCLR	3
P42226	636	EQMGKDGRG	3
P42226	647	PATIKMTVE	3
Q15170	6	DKPRKENEE	3
Q15170	30	STLPKSSPP	3
Q15170	141	RVRNKLMIM	3
Q07912	48	EDLEKIGMG	3
Q07912	64	WEAVKRRKA	3
Q07912	246	YLESKRFIH	3
Q07912	291	QEHRKVPFA	3
Q07912	342	QILHKIDKE	3
Q07912	371	CWAHKPEDR	3
Q07912	515	GGVKKPTYD	3
Q07912	533	SSDFKRLGL	3
Q07912	559	VPGTKASRG	3
Q07912	736	GGDDKPQVP	3
Q07912	852	VRDGKKVSS	3
Q07912	920	ALDPKANFS	3
Q69YN4	156	QPSLKRNPK	3
Q69YN4	384	EASVKLTEL	3
Q69YN4	399	DRGAKWVTA	3
Q69YN4	421	YLQLKNTKQ	3
Q69YN4	457	VRQLKAGTK	3
Q69YN4	461	KAGTKLVSS	3
Q69YN4	505	LNAFKALDS	3
Q69YN4	556	AILQKCHFY	3
Q69YN4	567	LSEIKRLGD	3
Q69YN4	705	LQATKDVLK	3
Q69YN4	844	SKSKKSVAY	3
Q69YN4	955	QKDLKWNLA	3
Q69YN4	978	RVLQKLNSI	3
Q69YN4	1014	LTLLKTMLT	3
Q69YN4	1320	SLPNKELMT	3
Q69YN4	1380	HSLLKRVVS	3
Q69YN4	1613	IEPAKRAHV	3
Q69YN4	1643	FRQRKQNTS	3
Q69YN4	1679	KRPLKVSQK	3
Q69YN4	1683	KVSQKISSR	3
Q69YN4	1795	GSRGKFVSG	3
P37231	107	QSAIKVEPA	3
P37231	125	QLYNKPHEE	3
P37231	160	CEGCKGFFR	3
P37231	189	KSRNKCQYC	3
P37231	218	PQAEKEKLL	3
P37231	289	MGEDKIKFK	3
P37231	293	KIKFKHITP	3
P37231	382	REFLKSLRK	3
Q9UBK2	79	NIFEKIDEE	3
Q9UBK2	184	PAIVKTENS	3
Q9UBK2	194	SNKAKSICQ	3
Q9UBK2	201	CQQQKPQRR	3
Q9UBK2	315	RASPKLKSS	3
Q9UBK2	346	NNSTKKGPE	3
Q9UBK2	360	AQLSKSSVL	3
Q9UBK2	374	ERKTKRPSL	3
Q9UBK2	393	SINSKTEIL	3
Q9UBK2	413	QLENKDVSS	3
Q9UBK2	451	CSTRKQLQD	3
Q9UBK2	496	EQFSKLPMF	3
Q9UBK2	646	HERLKREEY	3
Q9UBK2	656	REYEKRESE	3
Q9UBK2	754	FCGRKQFFK	3
Q9UBK2	777	PASTKSKYD	3
P50549	31	TNVRKRKFI	3
P50549	33	VRKRKFINR	3
P50549	87	GLPLKIKKE	3
P50549	89	PLKIKKEPH	3
P50549	110	EQPFKFSYG	3
P50549	311	VVPEKFDGD	3
P50549	388	MNYDKLSRS	3
P35222	19	EPDRKAAVS	3
P35222	170	VVVNKAAVM	3
P35222	181	QLSKKEASR	3
P35222	242	PALVKMLGS	3
P35222	270	QEGAKMAVR	3
P35222	288	ALLNKTNVK	3
P35222	292	KTNVKFLAI	3
P35222	312	NQESKLIIL	3
P35222	433	CNNYKNKMM	3
P35222	625	LAQDKEAAE	3
P35222	666	MSEDKPQDY	3
P35222	671	PQDYKKRLS	3
P35222	672	QDYKKRLSV	3
P51532	74	HQMHKPMES	3
P51532	405	TIELKALRL	3
P51532	443	YKRSKRQSL	3
P51532	455	RITEKLEKQ	3
P51532	471	KRRQKHQEY	3
P51532	484	LQHAKDFKE	3
P51532	516	EREQKKENE	3
P51532	524	ERIEKERMR	3
P51532	545	LIDQKKDKR	3
P51532	572	VRQHKAAQV	3
P51532	578	AQVAKEKKK	3
P51532	580	VAKEKKKKK	3
P51532	581	AKEKKKKKK	3
P51532	582	KEKKKKKKK	3
P51532	583	EKKKKKKKK	3
P51532	635	TDAPKAGQL	3
P51532	687	PVEEKKKIP	3
P51532	744	ERVDKQSAL	3
P51532	785	MGLGKTIQT	3
P51532	800	LMEHKRING	3
P51532	835	KVSYKGSPA	3
P51532	867	IIKDKHILA	3
P51532	876	KIRWKYMIV	3
P51532	953	MTGEKVDLN	3
P51532	970	RRLHKVLRP	3
P51532	981	LRRLKKEVE	3
P51532	982	RRLKKEVEA	3
P51532	991	QLPEKVEYV	3
P51532	997	EYVIKCDMS	3
P51532	1014	HMQAKGVLL	3
P51532	1081	RASGKFELL	3
P51532	1091	RILPKLRAT	3
P51532	1140	GMLLKTFNE	3
P51532	1227	NVDQKVIQA	3
P51532	1237	MFDQKSSSH	3
P51532	1332	ARNPKRKPR	3
P51532	1334	NPKRKPRLM	3
P51532	1375	SRHRKEVDY	3
P51532	1407	EVRQKKSSR	3
P51532	1408	VRQKKSSRK	3
P51532	1433	RSRDKDDES	3
P51532	1461	NLTKKMKKI	3
P51532	1463	TKKMKKIVD	3
P51532	1464	KKMKKIVDA	3
P51532	1503	ELIRKPVDF	3
P51532	1508	PVDFKKIKE	3
P51532	1527	NDLEKDVML	3
P51532	1566	QKIEKEDDS	3
P51532	1596	SVKVKIKLG	3
P51532	1598	KVKIKLGRK	3
P51532	1623	GSRAKPVVS	3
Q09472	14	PPSAKRPKL	3
Q09472	77	DAASKHKQL	3
Q09472	243	PQPLKMGMM	3
Q09472	292	AMDKKAVPG	3
Q09472	350	LHAHKCQRR	3
Q09472	373	CRTMKNVLN	3
Q09472	586	HLVHKLVQA	3
Q09472	601	PAALKDRRM	3
Q09472	636	LLAEKIYKI	3
Q09472	647	ELEEKRRTR	3
Q09472	654	TRLQKQNML	3
Q09472	970	AIAEKQPSQ	3
Q09472	981	KMEAKMEVD	3
Q09472	1020	STELKTEIK	3
Q09472	1024	KTEIKEEED	3
Q09472	1050	KKIFKPEEL	3
Q09472	1094	FDIVKSPMD	3
Q09472	1134	LYNRKTSRV	3
Q09472	1140	SRVYKYCSK	3
Q09472	1180	CCYGKQLCT	3
Q09472	1203	HFCEKCFNE	3
Q09472	1233	EQFSKRKND	3
Q09472	1253	ECGRKMHQI	3
Q09472	1284	ARTRKENKF	3
Q09472	1287	RKENKFSAK	3
Q09472	1336	TVEVKPGMK	3
Q09472	1340	KPGMKARFV	3
Q09472	1426	LEYVKKLGY	3
Q09472	1459	QKIPKPKRL	3
Q09472	1468	QEWYKKMLD	3
Q09472	1499	LTSAKELPY	3
Q09472	1528	EEERKREEN	3
Q09472	1551	NAKKKNNKK	3
Q09472	1555	KNNKKTSKN	3
Q09472	1558	KKTSKNKSS	3
Q09472	1570	GNKKKPGMP	3
Q09472	1637	LARDKHLEF	3
Q09472	1674	CNECKHHVE	3
Q09472	1769	VQHTKGCKR	3
Q09472	1783	CPICKQLIA	3
Q09472	1810	CLNIKQKLR	3
Q09472	1812	NIKQKLRQQ	3
Q09472	1900	VSQGKAAGQ	3
P04637	101	VPSQKTYQG	3
P04637	120	SGTAKSVTC	3
P04637	164	MAIYKQSQH	3
P04637	291	ENLRKKGEP	3
P04637	292	NLRKKGEPH	3
P04637	320	PQPKKKPLD	3
P04637	321	QPKKKPLDG	3
P04637	370	SSHLKSKKG	3
P04637	381	TSRHKKLMF	3
Q9UNE7	22	GSPEKSPSA	3
Q9UNE7	30	AQELKEQGN	3
Q9UNE7	41	FVGRKYPEA	3
Q9UNE7	145	IAKKKRWNS	3
Q9UNE7	206	AKHDKYMAD	3
Q9UNE7	223	DEKRKKRDI	3
Q9UNE7	224	EKRKKRDIP	3
Q99750	142	SQGSKKSKS	3
Q99750	143	QGSKKSKSS	3
Q99750	145	SKKSKSSSK	3
Q9P1T7	33	TAQGKCDKD	3
Q9P1T7	114	HHGAKHGSA	3
Q9P1T7	134	KMHRKIQSS	3
Q9P1T7	148	DISKKSKVN	3
O94953	14	NPSCKIMTF	3
O94953	90	YNIQKKAMT	3
O94953	121	DLERKYWKN	3
O94953	124	RKYWKNLTF	3
O94953	183	FGMWKTTFA	3
O94953	242	FLRHKMTLI	3
O94953	315	KDMVKISMD	3
O94953	368	SLKAKLLRR	3
O94953	381	RSQPKKPKP	3
O94953	409	GGSVKEEAG	3
O94953	449	LRPTKAKSE	3
O94953	456	SERKKKSFG	3
O94953	521	ELEAKPRPI	3
O94953	537	PRPGKAAFN	3
O94953	557	HFAQKGPTW	3
O94953	602	STFSKLKME	3
O94953	608	KMEIKKSRR	3
O94953	609	MEIKKSRRH	3
O94953	719	TLPSKSRQK	3
O94953	723	KSRQKTRPL	3
O94953	851	RWKLKCVYC	3
O94953	857	VYCRKRMKK	3
O94953	905	ITCLKHKSG	3
O94953	928	VVITKNRNG	3
O94953	994	GNLYKAKFI	3
P55317	163	AKTFKRSYP	3
P55317	189	QAPSKMLTL	3
P55317	264	LRRQKRFKC	3
P55317	270	FKCEKQPGA	3
P55317	288	GSGAKGGPE	3
P55317	295	PESRKDPSG	3
P55317	389	QLHLKGDPH	3
P14859	272	QSTPKRIDT	3
P14859	301	QRRIKLGFT	3
P14859	315	LAMGKLYGN	3
P14859	337	NLSFKNMCK	3
P14859	341	KNMCKLKPL	3
P14859	343	MCKLKPLLE	3
P14859	396	VALEKSFLE	3
P14859	433	NRRQKEKRI	3
Q99814	8	DKEKKRSSS	3
Q99814	53	SHLDKASIM	3
Q99814	158	GFGKKSKDM	3
Q99814	160	GKKSKDMST	3
Q99814	173	FMRMKCTVT	3
Q99814	186	TVNLKSATW	3
Q99814	242	PLDSKTFLS	3
Q99814	299	NLCTKGQVV	3
Q99814	385	AVSEKSNFL	3
Q99814	429	SAYGKAILP	3
Q99814	512	DTEAKDQCS	3
Q99814	587	FLLDKFQQQ	3
Q99814	614	DAGSKASLP	3
Q99814	741	WKRMKNLRG	3
Q99814	764	VPNDKFTQN	3
Q99814	796	GENSKSRFP	3
Q99814	818	SSAHKVSGM	3
Q9HAZ2	146	GCITKISED	3
Q9HAZ2	195	QIYYKVIKD	3
Q9HAZ2	249	LRRHKKYTC	3
Q9HAZ2	284	AHECKDCER	3
Q9HAZ2	310	EREYKCDQC	3
Q9HAZ2	316	DQCPKAFNW	3
Q9HAZ2	335	HDSGKRFEC	3
Q9HAZ2	401	EVCHKSYTQ	3
Q9HAZ2	413	LCRHKRMHA	3
Q9HAZ2	471	PMMDKAKPS	3
Q9HAZ2	473	MDKAKPSPS	3
Q9HAZ2	546	TQDAKLPSP	3
Q9HAZ2	635	SDPDKDKGK	3
Q9HAZ2	637	PDKDKGKGK	3
Q9HAZ2	648	EGQPKFGGG	3
Q9HAZ2	694	GDSIKAIAS	3
Q9HAZ2	715	MQEKKLGSL	3
Q9HAZ2	824	REPRKNHVY	3
Q9HAZ2	832	YGERKLGAG	3
Q9HAZ2	872	SRVEKRKVT	3
Q9HAZ2	874	VEKRKVTDP	3
Q9HAZ2	946	PILRKGKER	3
Q9HAZ2	982	PYRCKYCDR	3
Q9HAZ2	1004	NIHNKEKPF	3
Q9HAZ2	1009	EKPFKCHLC	3
Q9HAZ2	1028	DRHLKKHEH	3
Q9HAZ2	1094	TRTEKRADM	3
Q9HAZ2	1222	SEALKHTLC	3
O14497	327	GGAGKGPAD	3
O14497	622	MTSSKGGQE	3
O14497	997	SKSKKSSSS	3
O14497	1007	TTNEKITKL	3
O14497	1047	AVGRKPLDL	3
O14497	1072	NKNKKWREL	3
O14497	1106	AFECKIERG	3
O14497	1124	AADSKKSQP	3
O14497	1201	STFQKRNSM	3
O14497	1677	MMSLKSGLL	3
O14497	1752	GRFSKVSSP	3
O14497	1808	KLISKFDKL	3
O14497	1811	SKFDKLPVK	3
O14497	1815	KLPVKIVQK	3
O14497	1819	KIVQKNDPF	3
O14497	1830	DCSDKLGRV	3
O14497	1862	HFESKTELL	3
O14497	1880	PAPRKHVTT	3
O14497	1905	GPPEKRITA	3
O14497	1928	EDGAKSSEA	3
O14497	1938	KESSKFPFG	3
O14497	1953	HRNIKILED	3
O14497	2025	HPERKQAPL	3
O14497	2189	IAVQKGSIG	3
O14497	2243	LALAKVDEN	3
Q92925	117	DPFRKRLLV	3
Q92925	139	LKRRKMADK	3
Q92925	191	PLTQKRKLR	3
Q92925	193	TQKRKLRIY	3
Q92925	206	FSPSKAEGD	3
Q92925	226	PAGDKVASW	3
Q92925	237	RVEGKLLDD	3
Q92925	262	IELDKELYG	3
Q92925	376	EIPMKLAGL	3
Q92925	401	PNDQKKTAC	3
Q92925	402	NDQKKTACY	3
Q92925	417	DDPLKAQMS	3
Q92925	480	RRDLKIITD	3
P17252	91	PGADKGPDT	3
P17252	141	MNVHKQCVI	3
P17252	181	VRDAKNLIP	3
P17252	236	KPSDKDRRL	3
P17252	371	IKILKKDVV	3
P17252	372	KILKKDVVI	3
P17252	396	ALLDKPPFL	3
P17252	434	QQVGKFKEP	3
P17252	486	FGMCKEHMM	3
P17252	517	QPYGKSVDW	3
P17252	570	VSVCKGLMT	3
P17252	575	GLMTKHPAK	3
P17252	617	PFKPKVCGK	3
P17252	621	KVCGKGAEN	3
P22694	9	ATAKKGSEV	3
P22694	22	EFLAKAKED	3
P22694	24	LAKAKEDFL	3
P22694	48	FERKKTLGT	3
P22694	82	QKVVKLKQI	3
P22694	93	TLNEKRILQ	3
P22694	218	KGYNKAVDW	3
P22694	280	VDLTKRFGN	3
P22694	343	SITEKCAKE	3
P22612	8	APAKKDTEQ	3
P22612	73	HYAMKILNK	3
P22612	77	KILNKQKVV	3
P22612	82	QKVVKMKQV	3
P22612	93	ILNEKRILQ	3
P22612	169	HRDLKPENL	3
P22612	218	KGYNKAVDW	3
[truncated: 1,980 more rows]

## Sheet: high stringency (1.00) scoring
Supplementary Table 3C. KDM3A interactome peptides scored with PeSA 1.0 threshold adjusted KDM3A PSSM
uniprot_id	position	window	score
P68431	10	QTARKSTGG	9
Q09472	1774	GCKRKTNGG	7
Q03164	2517	QAPRKRTVK	6
O60885	184	GRGRKETGT	6
P01106	157	QAARKDSGS	6
P51114	246	QQARKVPGV	6
Q03164	234	GVKIKITHG	5
Q03164	332	QKVRKDKEG	5
Q03164	818	QRPRKQTSA	5
Q03164	1534	CVRCKSCGS	5
Q03164	1714	GVKRKMDQG	5
Q9Y4C1	652	QVAWKRAVK	5
Q9Y4C1	702	GAAYKTFSW	5
Q9Y2Z0	330	RAMNKSFME	5
P0DMV8	159	RQATKDAGV	5
P0DMV8	493	TATDKSTGK	5
P0DMV8	500	GKANKITIT	5
P0DMV9	159	RQATKDAGV	5
P0DMV9	493	TATDKSTGK	5
P0DMV9	500	GKANKITIT	5
P11142	159	RQATKDAGT	5
P11142	493	SAVDKSTGK	5
P62701	128	CKVRKIFVG	5
P10275	521	PTCVKSEMG	5
Q14781	74	RKRGKRPRG	5
Q14781	82	GRPRKLTAM	5
Q14781	191	KTARKDLGA	5
Q5VYK3	1056	GALGKTPDG	5
O00321	310	DIVRKSGGR	5
P68431	28	KAARKSAPA	5
P68431	57	RRYQKSTEL	5
Q16665	719	NAQRKRKME	5
Q7Z6Z7	1263	RKPLKVYGG	5
Q7Z6Z7	1470	MTAIKRNGA	5
Q7Z6Z7	2725	CTASKSNDS	5
O15054	991	RRACKDSVG	5
Q8IZQ8	277	QKAEKSPPP	5
P42226	374	RCERKGTES	5
Q07912	73	LCKRKSWMS	5
P04637	357	AQAGKEPGG	5
P14859	382	RRRKKRTSI	5
Q9HAZ2	12	RKLAKSDGD	5
Q9HAZ2	101	GVWAKRKME	5
Q9HAZ2	122	RAAAKETDF	5
Q9HAZ2	250	RRHKKYTCG	5
O14497	1370	QQNYKRPMD	5
Q92925	176	TIARKRMEI	5
P10644	242	STLRKRKMY	5
P31321	242	STLRKRKMY	5
P08151	384	RKHVKTVHG	5
P49368	317	RRVRKTDNN	5
Q03164	257	LKKIKRTPS	4
Q03164	269	QQATKIKKL	4
Q03164	295	QIGRKGVQI	4
Q03164	381	QRAKKGAQK	4
Q03164	400	GRKVKTQVK	4
Q03164	609	QGKRKSILR	4
Q03164	737	NRKRKRKVF	4
Q03164	866	RDADKSVEK	4
Q03164	892	SRKEKRKKG	4
Q03164	929	SSAKKATGR	4
Q03164	957	TTAVKTKIL	4
Q03164	1015	AQADKLPMT	4
Q03164	1039	CKIEKSKSL	4
Q03164	1193	CKMRKCQNL	4
Q03164	1270	PVEEKSEEG	4
Q03164	1293	PASRKSSKQ	4
Q03164	1668	RQAAKPPDL	4
Q03164	2063	TDARKRCVY	4
Q03164	2431	QKGKKSCKE	4
Q03164	2736	ATTRKSSQI	4
Q03164	2742	SQIPKRNGK	4
Q03164	3655	QQEQKRKES	4
Q03164	3933	FAMRKIYRG	4
Q9Y4C1	100	LAERKSPEI	4
Q9Y4C1	263	AVKRKSSEN	4
Q9Y4C1	394	CTQPKTNTD	4
Q9Y4C1	779	LAGEKPTLG	4
Q9Y4C1	805	EAASKPAGS	4
Q9Y4C1	918	LVQNKTTSD	4
Q9Y4C1	1220	RSLRKRLHQ	4
Q12931	629	QQLAKTQEE	4
P07900	112	GTIAKSGTK	4
P07900	147	LVAEKVTVI	4
P08238	107	GTIAKSGTK	4
P08238	505	ERVRKRGFE	4
P0DMV8	271	CERAKRTLS	4
P0DMV9	271	CERAKRTLS	4
P11142	220	IFEVKSTAG	4
P11142	271	CERAKRTLS	4
P11142	500	GKENKITIT	4
P11142	589	QTAEKEEFE	4
P62424	120	ARAEKKAAG	4
P62424	121	RAEKKAAGK	4
P62424	197	LVHRKTCTT	4
P15880	183	TVPCKVTGR	4
P31689	73	EQAIKEGGA	4
P31689	125	GATRKLALQ	4
O95816	171	QKKIKRRLE	4
O95816	200	GAGSKTLQQ	4
O60884	152	GQGGKSGAV	4
O60884	297	QIVVKYPPG	4
P62701	16	VAAPKHWML	4
P62701	71	QRFIKIDGK	4
P62701	259	RLAAKQSSG	4
Q99598	12	GGFRKRKHD	4
Q99598	68	TVESKRTIF	4
Q99598	164	GKENKTPSS	4
Q99598	261	CYALKVRGS	4
P10275	17	RPPSKTYRG	4
P10275	301	DSAGKSTED	4
P10275	619	CRLRKCYEA	4
P10275	778	YRMHKSRMY	4
P10275	846	IIACKRKNP	4
Q8N6H7	15	QTLFKRLRA	4
Q8N6H7	222	PAAAKKGLG	4
Q8N6H7	223	AAAKKGLGA	4
Q8N6H7	253	QVAEKLREQ	4
Q8N6H7	286	QIDRKKEEK	4
Q8N6H7	497	KQGVKSVAG	4
P56211	109	LVASKLAG	4
P35226	314	NRPRKSSVN	4
O60885	72	RVVLKTLWK	4
O60885	102	YKIIKTPMD	4
O60885	112	GTIKKRLEN	4
O60885	283	PQPVKTKKG	4
O60885	291	GVKRKADTT	4
O60885	680	RKKRKPQAE	4
O60885	1330	ELARKREQE	4
Q14781	20	CILSKRLRK	4
Q14781	71	VQNRKRGKR	4
Q14781	283	QATNKCGLG	4
Q14781	390	PAPGKGTGS	4
Q14781	451	GEARKAATL	4
O00257	114	GAQGKGQGH	4
O00257	205	GAGAKGYLG	4
O00257	278	MQAVKIKSG	4
O00257	312	RTFKKAAGA	4
Q9Y3E7	106	GSLQKSTEV	4
Q96FZ7	35	RQYQKRIAQ	4
Q96FZ7	99	QIEMKVMEG	4
Q5VYK3	227	FYAAKRVIG	4
Q5VYK3	313	DIPLKTKEG	4
Q5VYK3	502	QVAVKFAST	4
Q5VYK3	547	GRNRKESTS	4
Q5VYK3	738	EQLIKTTKD	4
Q5VYK3	1007	DVASKGLGL	4
Q5VYK3	1283	VKISKSAGA	4
Q15056	123	RKQDKGGFG	4
O00321	285	WGERKRKPG	4
O00321	287	ERKRKPGMN	4
P22102	375	GTALKNGKV	4
P22102	411	LAAIKFEGA	4
P22102	419	AIYRKDVGF	4
Q13630	282	GQFKKTASN	4
Q13630	306	KQAVKETCA	4
Q16665	21	RRKEKSRDA	4
Q16665	310	RMLAKRGGY	4
Q16665	721	QRKRKMEHD	4
Q7Z6Z7	9	RTKLKKTPT	4
Q7Z6Z7	214	VKIEKRTTS	4
Q7Z6Z7	318	QITDKQLME	4
Q7Z6Z7	988	TQGGKRSDG	4
Q7Z6Z7	1715	DIKRKENKG	4
Q7Z6Z7	1799	FAELKSTRM	4
Q7Z6Z7	1926	VQLVKTTPL	4
Q7Z6Z7	2063	GKGSKPLMP	4
Q7Z6Z7	3257	KKSSKSCGS	4
Q7Z6Z7	3357	QQRTKETNC	4
Q7Z6Z7	3697	VASQKRPLG	4
Q7Z6Z7	3742	RRANKKAKQ	4
Q7Z6Z7	3745	NKKAKQTGR	4
Q7Z6Z7	4221	GAIRKQLAA	4
Q8IU81	394	EAAGKMTTE	4
Q8IU81	438	GHSPKDPGG	4
Q969V6	294	PAPPKSAGE	4
Q969V6	499	QILVKEEGP	4
Q9ULH7	790	QQVRKVFTN	4
P01106	275	QAPGKRSES	4
Q8IZQ8	239	HAAVKSKSL	4
Q8IZQ8	241	AVKSKSLGD	4
Q8IZQ8	588	QVPVKRQSS	4
P61218	50	QANQKRITT	4
P61218	101	LKARKIPII	4
Q6ZTQ3	32	KKEEKMTMM	4
Q6ZTQ3	197	RKRMKPLMM	4
Q6ZTQ3	278	QRRLKKTDI	4
Q6ZTQ3	279	RRLKKTDIP	4
O43353	47	QVAVKHLHI	4
O43353	410	FCDHKTTPC	4
Q07912	100	STFRKTSPA	4
Q07912	219	DRLRKHQGH	4
Q07912	961	RPADKIQMA	4
Q69YN4	356	SCPYKTTFE	4
Q69YN4	528	RQNEKSGYQ	4
Q69YN4	651	QQPVKSFPT	4
Q69YN4	1078	GVNEKLTIS	4
Q69YN4	1388	STFSKDTGE	4
Q69YN4	1584	PGRTKTTKG	4
P37231	185	RIHKKSRNK	4
P37231	486	QVIKKTETD	4
P50549	404	GIMQKVAGE	4
P35222	233	LAIFKSGGI	4
P35222	394	DAATKQEGM	4
P51532	207	AVQGKRPMP	4
P51532	440	AKAYKRSKR	4
P51532	467	EQERKRRQK	4
P51532	499	GKIQKLTKA	4
P51532	548	QKKDKRLAY	4
P51532	1027	EKDKKGKGG	4
P51532	1414	SRKRKRDSD	4
Q09472	277	QIQTKTVLS	4
Q09472	386	CQSGKSCQV	4
Q09472	614	AYARKVEGD	4
Q09472	1105	TIKRKLDTG	4
Q09472	1167	CCGRKLEFS	4
Q09472	1278	GCLKKSART	4
Q09472	1762	CQKMKRVVQ	4
Q09472	2091	QRAAKYANS	4
P04637	139	CQLAKTCPV	4
Q9UNE7	7	GKEEKEGGA	4
Q9UNE7	144	RIAKKKRWN	4
Q9UNE7	221	QVDEKRKKR	4
O94953	311	CTCRKDMVK	4
O94953	376	RSHRKRSQP	4
O94953	457	ERKKKSFGL	4
O94953	672	QAERKFNAA	4
O94953	860	RKRMKKVSG	4
O94953	907	CLKHKSGGH	4
O94953	1059	AKAAKRPRV	4
P55317	316	GVHGKTGQL	4
P14859	435	RQKEKRINP	4
Q99814	18	RRKEKSRDA	4
Q99814	29	CRRSKETEV	4
Q9HAZ2	9	ARARKLAKS	4
Q9HAZ2	103	WAKRKMEAG	4
Q9HAZ2	426	QIKCKDCGQ	4
Q9HAZ2	702	SIAEKYFGP	4
Q9HAZ2	763	RDALKVGGP	4
Q9HAZ2	915	FAAMKADSG	4
Q9HAZ2	1259	DAWLKVTGA	4
O14497	893	GMNRKTQET	4
O14497	1059	YVSVKEIGG	4
O14497	1238	GSMRKAPGS	4
O14497	1382	GPPAKRHEG	4
Q92925	136	RRGLKRRKM	4
Q92925	289	GFQVKRPGD	4
P17252	23	RFARKGALR	4
P17252	307	QKFEKAKLG	4
P17252	359	LADRKGTEE	4
P22694	47	DFERKKTLG	4
P22694	250	QIYEKIVSG	4
P22612	250	QIYEKIVSG	4
P13861	248	NNAKKRKMF	4
P31323	263	NNAKKRKMY	4
P31323	326	KITMKRKGK	4
O60674	73	IAASKACGI	4
O60674	558	GTFTKIFKG	4
O60674	857	QQLGKGNFG	4
O60674	926	RRNLKLIME	4
P40763	153	QDVRKRVQD	4
P40763	180	YKTLKSQGD	4
P05412	258	KAERKRMRN	4
P05412	271	SKCRKRKLE	4
P05412	273	CRKRKLERI	4
P47756	159	EVQEKSSGR	4
P47756	181	LQTNKSGSG	4
P08151	76	RSAVKLTKK	4
P08151	658	VQRFKSLGC	4
P08151	815	QVQVKPEQG	4
P08151	929	YQSPKFLGG	4
O75582	93	VQKAKTTEH	4
O75582	273	RRILKSEPP	4
O75582	447	CVHKKSNQA	4
O75582	473	ITALKLCEG	4
O75582	747	RRKMKKTST	4
O75582	748	RKMKKTSTS	4
P55072	312	AIAPKREKT	4
P55072	315	PKREKTHGE	4
P55072	425	QAIRKKMDL	4
P55072	696	QRACKLAIR	4
P49368	15	SQNTKRESG	4
P49368	44	CLGPKSMMK	4
P49368	203	ARVEKIPGG	4
P03372	244	CRLRKCYEV	4
P03372	257	GGIRKDRRG	4
P03372	481	RVLDKITDT	4
Q03164	174	TSPRKPRGR	3
Q03164	216	KKDSKSIEK	3
Q03164	221	SIEKKRGRP	3
Q03164	272	TKIKKLRAG	3
Q03164	277	LRAGKLSPL	3
Q03164	289	FKTGKLQIG	3
Q03164	313	TERIKTPSG	3
Q03164	345	TKEDKTVVR	3
Q03164	365	IPSSKRTDA	3
Q03164	386	GAQKKIEKE	3
Q03164	398	LQGRKVKTQ	3
Q03164	423	SRIIKTPRR	3
Q03164	461	GSSEKSSAA	3
Q03164	545	RTTKKLSTL	3
Q03164	645	GLIRKPIFD	3
Q03164	735	VSNRKRKRK	3
Q03164	739	KRKRKVFSP	3
Q03164	885	EKENKRESR	3
Q03164	890	RESRKEKRK	3
Q03164	913	GRVSKEKVV	3
Q03164	934	ATGRKKSSS	3
Q03164	963	KILIKKGRG	3
Q03164	971	GNLEKTNLD	3
Q03164	1044	SKSLKQTDQ	3
Q03164	1082	ALGRKRAVF	3
Q03164	1113	GNDDKSSIA	3
Q03164	1176	NCLDKPKFG	3
Q03164	1185	GRNIKKQCC	3
Q03164	1211	QKQAKAVKK	3
Q03164	1214	AKAVKKKEK	3
Q03164	1219	KKEKKSKTS	3
Q03164	1221	EKKSKTSEK	3
Q03164	1256	PAPKKSSSE	3
Q03164	1296	RKSSKQVSQ	3
Q03164	1317	GPPRKEVPK	3
Q03164	1321	KEVPKTTPS	3
Q03164	1406	RVDFKEDCE	3
Q03164	1480	CRRCKFCHV	3
Q03164	1493	HQATKQLLE	3
Q03164	1645	QISLKQVLT	3
Q03164	1712	LEGVKRKMD	3
Q03164	1828	IPAPKPKGP	3
Q03164	2009	SLRRKFLNG	3
Q03164	2307	LKGEKTKVL	3
Q03164	2314	VLSSKSSEG	3
Q03164	2400	DTEVKTLKL	3
Q03164	2403	VKTLKLSGM	3
Q03164	2430	RQKGKKSCK	3
Q03164	2434	KKSCKETFK	3
Q03164	2521	KRTVKVTLT	3
Q03164	2655	STGKKRGKR	3
Q03164	2658	KKRGKRSAE	3
Q03164	2746	KRNGKENGT	3
Q03164	2769	EHVTKSSVG	3
Q03164	2790	VSRVKTQGQ	3
Q03164	2965	TITEKSVAS	3
Q03164	3101	GVTQKIQLT	3
Q03164	3230	LQTRKNKKL	3
Q03164	3233	RKNKKLAPS	3
Q03164	3290	IKRSKSSIM	3
Q03164	3462	LLASKTGIH	3
Q03164	3556	GKKHKVSHL	3
Q03164	3602	QSSQKECGQ	3
Q03164	3633	SAEPKTVEE	3
Q03164	3657	EQKRKESIT	3
Q03164	3664	ITEKKPKKG	3
Q03164	3691	EDAWKSLTD	3
Q03164	3744	CRNYKFRFH	3
Q03164	3772	VHLRKSAFD	3
Q03164	3804	EVQLKSARR	3
Q03164	3824	FRHLKKTSK	3
Q03164	3825	RHLKKTSKE	3
Q03164	3828	KKTSKEAVG	3
Q03164	3846	GLFCKRNID	3
Q03164	3870	IQTDKREKY	3
Q03164	3963	CGAKKCRKF	3
Q9Y4C1	74	ESWRKRRWI	3
Q9Y4C1	168	QIVSKEFQA	3
Q9Y4C1	188	LKGDKNLVG	3
Q9Y4C1	219	NPASKTLQV	3
Q9Y4C1	261	IGAVKRKSS	3
Q9Y4C1	277	SKQAKSCSE	3
Q9Y4C1	353	CLNTKSEAL	3
Q9Y4C1	371	GLLSKSSQI	3
Q9Y4C1	511	APSRKSVLT	3
Q9Y4C1	637	VISEKEAMS	3
Q9Y4C1	656	KRAVKGVRE	3
Q9Y4C1	691	CYRMKRKNC	3
Q9Y4C1	693	RMKRKNCQQ	3
Q9Y4C1	711	LKCVKSQIH	3
Q9Y4C1	895	SSTGKTENG	3
Q9Y4C1	925	SDLSKRPQG	3
Q9Y4C1	984	GVHHKLNSE	3
Q9Y4C1	997	ESFRKEFGE	3
Q9Y4C1	1038	LKNEKEPMV	3
Q9Y4C1	1080	RRDGKLNLA	3
Q9Y4C1	1167	FIEGKEKPG	3
Q9Y4C1	1180	IYAAKDTEK	3
Q9Y2Z0	70	ADAKKSLEL	3
Q9Y2Z0	152	SVWIKRCQE	3
Q9Y2Z0	211	SALVKLPSG	3
Q9Y2Z0	256	VRWEKLEGQ	3
Q9Y2Z0	289	RNWDKLVGE	3
Q9Y2Z0	302	EKNEKLEGD	3
Q9Y2Z0	325	SDEVKRAMN	3
Q12931	95	QAETKKLLD	3
Q12931	151	TNAEKGTIT	3
Q12931	196	EASSKIIGQ	3
Q12931	252	RTGTKIIIH	3
Q12931	258	IIHLKSDCK	3
Q12931	324	QAHDKPRYT	3
Q12931	375	LIQTKATDI	3
Q12931	424	QRLIKFFID	3
Q12931	577	CLSEKETEE	3
Q12931	598	VTNVKVTLR	3
P07900	185	GRGTKVILH	3
P07900	314	GEFYKSLTN	3
P07900	414	KVIRKNLVK	3
P07900	457	SQNRKKLSE	3
P07900	485	CTRMKENQK	3
P07900	513	ERLRKHGLE	3
P07900	534	VQQLKEFEG	3
P07900	564	KQEEKKTKF	3
P07900	565	QEEKKTKFE	3
P07900	576	CKIMKDILE	3
P07900	632	MAAKKHLEI	3
P07900	657	DKNDKSVKD	3
P07900	693	YRMIKLGLG	3
P08238	72	GKELKIDII	3
P08238	142	LVAEKVVVI	3
P08238	180	GRGTKVILH	3
P08238	266	GKDKKKKTK	3
P08238	268	DKKKKTKKI	3
P08238	306	GEFYKSLTN	3
P08238	406	KVIRKNIVK	3
P08238	526	VQQLKEFDG	3
P08238	568	CKLMKEILD	3
P08238	577	KKVEKVTIS	3
P08238	652	DKAVKDLVV	3
P08238	685	YRMIKLGLG	3
P0DMV8	56	GDAAKNQVA	3
P0DMV8	71	VFDAKRLIG	3
P0DMV8	77	LIGRKFGDP	3
P0DMV8	108	QVSYKGETK	3
P0DMV8	220	IFEVKATAG	3
P0DMV8	251	RKHKKDISQ	3
P0DMV8	361	RDLNKSINP	3
P0DMV8	415	TALIKRNST	3
P0DMV8	423	TIPTKQTQI	3
P0DMV8	451	RAMTKDNNL	3
P0DMV8	512	GRLSKEEIE	3
P0DMV8	524	QEAEKYKAE	3
P0DMV8	539	RVSAKNALE	3
P0DMV8	628	AQGPKGGSG	3
P0DMV9	56	GDAAKNQVA	3
P0DMV9	71	VFDAKRLIG	3
P0DMV9	77	LIGRKFGDP	3
P0DMV9	108	QVSYKGETK	3
P0DMV9	220	IFEVKATAG	3
P0DMV9	251	RKHKKDISQ	3
P0DMV9	361	RDLNKSINP	3
P0DMV9	415	TALIKRNST	3
P0DMV9	423	TIPTKQTQI	3
P0DMV9	451	RAMTKDNNL	3
P0DMV9	512	GRLSKEEIE	3
P0DMV9	524	QEAEKYKAE	3
P0DMV9	539	RVSAKNALE	3
P0DMV9	628	AQGPKGGSG	3
P12004	80	SKILKCAGN	3
P12004	138	SCVVKMPSG	3
P11142	56	GDAAKNQVA	3
P11142	71	VFDAKRLIG	3
P11142	108	QVEYKGETK	3
P11142	246	IAEFKRKHK	3
P11142	251	RKHKKDISE	3
P11142	328	AKLDKSQIH	3
P11142	415	TVLIKRNTT	3
P11142	423	TIPTKQTQT	3
P11142	451	RAMTKDNNL	3
P11142	512	GRLSKEDIE	3
P11142	524	QEAEKYKAE	3
P62424	6	PKGKKAKGK	3
P62424	8	GKKAKGKKV	3
P62424	26	QEAKKVVNP	3
P62424	37	EKRPKNFGI	3
P62424	48	DIQPKRDLT	3
P62424	72	AILYKRLKV	3
P62424	125	KAAGKGDVP	3
P62424	131	DVPTKRPPV	3
P62424	187	IIKGKARLG	3
P62424	217	GALAKLVEA	3
P15880	58	KAEDKEWMP	3
P15880	71	GRLVKDMKI	3
P15880	103	GASLKDEVL	3
P15880	125	RTRFKAFVA	3
P15880	212	PVPKKLLMM	3
P15880	238	GNFAKATFD	3
P15880	246	DAISKTYSY	3
P15880	263	TVFTKSPYQ	3
P31689	28	KAYRKLALK	3
P31689	60	SDAKKRELY	3
P31689	136	VICDKCEGR	3
P31689	143	GRGGKKGAV	3
P31689	190	RISPKDRCK	3
P31689	194	KDRCKSCNG	3
P31689	200	CNGRKIVRE	3
P31689	296	GQIVKHGDI	3
O95816	9	KINAKANEG	3
O95816	189	DKAIKLLEH	3
O60884	30	KAYRKLAKE	3
O60884	33	RKLAKEYHP	3
O60884	131	LYNGKTTKL	3
O60884	134	GKTTKLQLS	3
O60884	158	GAVQKCSAC	3
O60884	204	DRCKKCEGK	3
O60884	287	QFTFKHLDG	3
P62701	10	KKHLKRVAA	3
P62701	22	WMLDKLTGV	3
P62701	211	VVHVKDANG	3
P62701	233	GKGNKPWIS	3
Q99598	14	FRKRKHDNF	3
Q99598	27	RREGKDVNS	3
Q99598	40	MLAFKSFQQ	3
Q99598	100	GVRQKIFQV	3
Q99598	138	QHFIKTRSL	3
Q99598	173	DAQDKQFGT	3
Q99598	279	VFSVKTEMI	3
P68032	63	EAQSKRGIL	3
P10275	143	VAASKGLPQ	3
P10275	318	GGYTKGLEG	3
P10275	585	KVFFKRAAE	3
P10275	606	CTIDKFRRK	3
P10275	631	LGARKLKKL	3
P10275	633	ARKLKKLGN	3
P10275	634	RKLKKLGNL	3
P10275	659	ETTQKLTVS	3
P10275	721	VKWAKALPG	3
P10275	848	ACKRKNPTS	3
P10275	884	DLLIKSHMV	3
P10275	906	VQVPKILSG	3
Q8N6H7	203	GTSPKASLE	3
Q8N6H7	228	GLGAKKGLG	3
Q8N6H7	229	LGAKKGLGA	3
Q8N6H7	336	PVSAKSSRS	3
Q8N6H7	387	RVEEKEPEV	3
Q8N6H7	424	EARQKFAGA	3
Q8N6H7	502	SVAGKMAVL	3
P56211	51	DFLRKRLQK	3
P56211	58	QKGQKYFDS	3
P56211	84	AAPDKTEVT	3
P35226	8	TTRIKITEL	3
P35226	62	VQVHKTRPL	3
P35226	73	IRSDKTLQD	3
P35226	81	DIVYKLVPG	3
P35226	146	RLDRKVNKD	3
P35226	149	RKVNKDKEK	3
P35226	161	EVNDKRYLR	3
P35226	232	RPTCKRMKI	3
P35226	235	CKRMKISHQ	3
O60885	177	IVQAKGRGR	3
O60885	289	KKGVKRKAD	3
O60885	314	PPEPKTTKL	3
O60885	346	PAPEKSSKV	3
O60885	395	CDIIKHPMD	3
O60885	445	AMARKLQDV	3
O60885	592	PAPMKSKPP	3
O60885	677	SCLRKKRKP	3
O60885	678	CLRKKRKPQ	3
O60885	685	PQAEKVDVI	3
O60885	724	EMAPKSKKK	3
O60885	736	GREQKKHHH	3
O60885	794	APAMKSSPP	3
O60885	937	QQLQKVQPP	3
O60885	1050	PRHHKSDPY	3
O60885	1177	GAPDKDKQK	3
O60885	1185	KQEPKTPVA	3
O60885	1191	PVAPKKDLK	3
O60885	1242	EKALKAQAE	3
Q14781	24	KRLRKGKLE	3
Q14781	103	DAPSKSKSS	3
Q14781	162	DPIRKKRGR	3
Q14781	163	PIRKKRGRK	3
Q14781	167	KRGRKPLPP	3
Q14781	187	AKVLKTARK	3
Q14781	215	LAALKAHAK	3
Q14781	219	KAHAKEACG	3
Q14781	277	RLALKAQAT	3
Q14781	296	VRTQKGELG	3
Q14781	310	SKIPKAPSG	3
Q14781	362	LQSVKNGMP	3
Q14781	379	ATATKGVPA	3
Q14781	427	TPASKRDCV	3
Q14781	494	SQDWKPTRS	3
O00257	19	SIEKKRIRK	3
O00257	23	KRIRKGRVE	3
O00257	71	MGYRKRGPK	3
O00257	135	QPHSKERAG	3
O00257	140	ERAGKPPPP	3
O00257	149	GKSGKYYYQ	3
O00257	212	LGAVKPLAG	3
O00257	223	GAPGKGSEK	3
O00257	249	GIGGKMKIV	3
O00257	256	IVKNKNKNG	3
O00257	280	AVKIKSGEV	3
O00257	311	DRTFKKAAG	3
O00257	319	GAEEKKVEA	3
O00257	326	EAPPKRREE	3
O00257	411	SHVRKRCLS	3
O00257	479	LRCVKTRSE	3
O00257	517	TTAEKPPAE	3
Q9Y3E7	6	GLFGKTQEK	3
Q9Y3E7	25	LKIRKEMRV	3
Q9Y3E7	54	DAAKKGQKD	3
Q9Y3E7	72	IRSRKAVSK	3
Q9Y3E7	81	LYASKAHMN	3
Q9Y3E7	132	RELSKEMMK	3
Q9Y3E7	179	GALGKAPSK	3
Q9Y3E7	183	KAPSKVTDA	3
Q96FZ7	29	QQRDKLRQY	3
Q96FZ7	57	RDGRKERAK	3
P33316	84	GELPKAGGS	3
P33316	155	KAVVKTDIQ	3
P33316	179	GLAAKHFID	3
Q5VYK3	56	EGVRKKVME	3
Q5VYK3	57	GVRKKVMEL	3
Q5VYK3	70	NKRIKSRPK	3
Q5VYK3	304	NKMYKVYLG	3
Q5VYK3	321	GAVLKPELK	3
Q5VYK3	336	RVKLKIVPH	3
Q5VYK3	392	EIKIKPLGP	3
Q5VYK3	577	KTPVKYMTG	3
Q5VYK3	699	TEWIKSLMN	3
Q5VYK3	730	GNELKSMIE	3
Q5VYK3	766	RYLAKKKMR	3
Q5VYK3	768	LAKKKMRMS	3
Q5VYK3	980	HKEVKSHLK	3
Q5VYK3	1039	GKRVKHEVS	3
Q5VYK3	1153	LVTDKSMVD	3
Q5VYK3	1229	ELALKTLSK	3
Q5VYK3	1243	CDPAKGAAG	3
Q5VYK3	1261	CLLDKGMMS	3
Q5VYK3	1290	GAMLKPHAP	3
Q5VYK3	1336	LSAAKSSPM	3
Q5VYK3	1418	SVIQKSCAF	3
Q5VYK3	1622	QAVLKECSK	3
Q5VYK3	1647	LKATKEDRF	3
Q5VYK3	1838	AALLKKTLE	3
Q15056	76	LVRDKDTDK	3
Q15056	120	AEGRKQDKG	3
O00321	51	ETCWKGTSS	3
O00321	207	TTSLKRYQS	3
O00321	234	ARCPKTNHR	3
O00321	315	SGGRKYTYR	3
P22102	66	CKEKKIEFV	3
P22102	111	KRFAKEFMD	3
P22102	156	LAAGKGVIV	3
P22102	162	VIVAKSKEE	3
P22102	207	FTDGKTVAP	3
P22102	219	AQDHKRLLE	3
P22102	342	VMASKGYPG	3
P22102	459	QPLAKATSR	3
P22102	467	RSGCKVDLG	3
P22102	499	GVGTKLKIA	3
P22102	501	GTKLKIAQL	3
P22102	633	KIVAKSSLQ	3
P22102	779	RVKVKNLIE	3
P22102	964	AVPVKRGDT	3
Q13630	108	VGARKVVSC	3
Q13630	121	IFPDKTTYP	3
Q13630	199	VHLAKSSGS	3
Q13630	275	FDTTKSDGQ	3
P68431	5	MARTKQTAR	3
P68431	19	KAPRKQLAT	3
P68431	24	QLATKAARK	3
P68431	80	AQDFKTDLR	3
P68431	116	AIHAKRVTI	3
Q16665	10	GANDKKKIS	3
Q16665	71	LRVRKLLDA	3
Q16665	94	CFYLKALDG	3
Q16665	213	QCGYKKPPM	3
Q16665	214	CGYKKPPMT	3
Q16665	477	EVALKLEPN	3
Q16665	629	KTVTKDRME	3
Q16665	674	NRAGKGVIE	3
Q16665	682	EQTEKSHPR	3
Q16665	753	SLSWKRVKG	3
Q16665	759	VKGCKSSEQ	3
Q16665	769	GMEQKTIIL	3
Q7Z6Z7	10	TKLKKTPTE	3
Q7Z6Z7	42	LQQIKTWNI	3
Q7Z6Z7	143	YVFSKRSNY	3
Q7Z6Z7	155	LGSDKRTPL	3
Q7Z6Z7	211	GAEVKIEKR	3
Q7Z6Z7	272	SNHRKRLQA	3
Q7Z6Z7	417	LKVIKFLGD	3
Q7Z6Z7	509	AALLKSMLN	3
Q7Z6Z7	674	QPTLKTDAT	3
Q7Z6Z7	696	GRDPKYICQ	3
Q7Z6Z7	1072	GLLVKLCVG	3
Q7Z6Z7	1225	SLPAKLPGG	3
Q7Z6Z7	1293	ERLSKEKEG	3
Q7Z6Z7	1403	VACRKEEEE	3
Q7Z6Z7	1572	LQAAKEQKE	3
Q7Z6Z7	1601	AISSKRRAQ	3
Q7Z6Z7	1643	DSAWKSGET	3
Q7Z6Z7	1693	NKNSKNSNG	3
Q7Z6Z7	1702	QELEKTLEE	3
Q7Z6Z7	1718	RKENKGNDT	3
Q7Z6Z7	1790	TRDHKYAMM	3
Q7Z6Z7	1964	EEADKSDPK	3
Q7Z6Z7	2044	RDGKKDKEG	3
Q7Z6Z7	2046	GKKDKEGDR	3
Q7Z6Z7	2126	NAEDKDTPA	3
Q7Z6Z7	2203	SATAKTQHN	3
Q7Z6Z7	2248	NAALKPLET	3
Q7Z6Z7	2692	ERREKRRKQ	3
Q7Z6Z7	2695	EKRRKQLAE	3
Q7Z6Z7	2712	GKEDKENRD	3
Q7Z6Z7	2759	TSESKETLG	3
Q7Z6Z7	3254	EKGKKSSKS	3
Q7Z6Z7	3310	SGGRKHTEK	3
Q7Z6Z7	3403	NVSRKGKNS	3
Q7Z6Z7	3554	TKGSKSPAK	3
Q7Z6Z7	3636	YTLCKQIGT	3
Q7Z6Z7	3675	PQTTKLKGK	3
Q7Z6Z7	3677	TTKLKGKMQ	3
Q7Z6Z7	3743	RANKKAKQT	3
Q7Z6Z7	3999	DVKRKYFRQ	3
Q7Z6Z7	4014	EGLRKEDMA	3
Q7Z6Z7	4037	ELHRKSPEE	3
Q7Z6Z7	4116	RIVAKAVYD	3
Q7Z6Z7	4134	RSFYKHILG	3
Q7Z6Z7	4139	HILGKSVRY	3
Q7Z6Z7	4190	VRDLKPNGA	3
Q7Z6Z7	4236	EIIPKRLIS	3
Q8IU81	56	ARQLKRSHV	3
Q8IU81	247	NVRFKKDHG	3
Q8IU81	248	VRFKKDHGL	3
Q8IU81	382	PRRRKASPE	3
Q8IU81	427	IAALKNVAE	3
Q8IU81	536	REFIKAQGP	3
O15054	185	HLEHKRNYG	3
O15054	191	NYGAKRGGP	3
O15054	198	GPPVKRAAE	3
O15054	228	SPGGKRRRG	3
O15054	295	GPERKGSAP	3
O15054	447	HSSRKPFLG	3
O15054	959	PAQAKEEAG	3
O15054	1006	RAKAKAKVP	3
O15054	1033	QGREKSRPD	3
O15054	1043	GGASKAKPP	3
O15054	1109	IRLIKVESG	3
O15054	1150	SRNAKVKGK	3
O15054	1381	QLYMKVPGS	3
O15054	1509	VKNVKSIVP	3
O15054	1559	VRAGKKIAY	3
O15054	1560	RAGKKIAYQ	3
Q969V6	62	QLKLKRARL	3
Q969V6	202	IPTAKSTPT	3
Q969V6	214	QSQPKSASE	3
Q969V6	219	SASEKSQRS	3
Q969V6	225	QRSKKAKEL	3
Q969V6	576	GTPVKQENS	3
Q9ULH7	36	GSNQKSLKE	3
Q9ULH7	39	QKSLKEVLQ	3
Q9ULH7	122	QMKLKRARL	3
Q9ULH7	286	CKDPKPRVK	3
Q9ULH7	306	QKGEKNEPQ	3
Q9ULH7	402	KTELKLRGL	3
Q9ULH7	559	DAAEKDRKL	3
Q9ULH7	562	EKDRKLQEK	3
Q9ULH7	615	GHSVKSDQK	3
Q9ULH7	665	LVAKKAVVI	3
Q9ULH7	879	EEAIKQTRS	3
Q9ULH7	908	DILIKSGEI	3
P01106	143	SAAAKLVSE	3
P01106	323	YPAAKRVKL	3
P01106	341	SNNRKCTSP	3
P01106	371	RNELKRSFF	3
P01106	392	EKAPKVVIL	3
P01106	398	VILKKATAY	3
P01106	422	DLLRKRREQ	3
Q8IZQ8	100	QMKLKRARL	3
Q8IZQ8	146	VSFSKSTDA	3
Q8IZQ8	222	SDAGKQGLG	3
Q8IZQ8	324	QAQLKEPNE	3
Q8IZQ8	553	LQKQKRNNC	3
Q8IZQ8	644	LGAVKSPQH	3
Q8IZQ8	709	PTFSKSSSA	3
Q8IZQ8	728	EDAVKQQMT	3
Q8IZQ8	766	QKVPKIPRS	3
P61218	95	LIAMKELKA	3
P36873	41	GLCLKSREI	3
P36873	60	EAPLKICGD	3
P36873	150	IKLWKTFTD	3
O14744	35	GAVAKQGFD	3
O14744	60	QEPAKNRPG	3
O14744	184	SGEEKTWMW	3
O14744	200	CDYSKRIAV	3
O14744	343	QAIYKCLLD	3
O14744	380	LRAAKQADR	3
O14744	458	QHFLKDDGV	3
Q6ZTQ3	49	FINEKTFIT	3
Q6ZTQ3	119	FTSMKSSDV	3
Q6ZTQ3	194	ALVRKRMKP	3
Q6ZTQ3	345	RIVTKFNKE	3
O43353	110	LLHRKTEYP	3
O43353	182	SRSSKSAPE	3
O43353	209	RASIKHDIY	3
O43353	310	VIQLKKTKL	3
O43353	311	IQLKKTKLQ	3
O43353	443	WIQSKREDI	3
O43353	480	LVSTKPTRT	3
O43353	513	LKDNKQMGL	3
Q9Y224	5	MFRRKLTAL	3
Q9Y224	185	VALDKHILG	3
Q9Y224	234	IADPKTDHR	3
P42226	108	QGEKKAVME	3
P42226	129	QEELKFKTG	3
P42226	205	IQIWKRQQQ	3
P42226	284	PQVLKTQTK	3
P42226	288	KTQTKFQAG	3
P42226	307	GAPAKPPLV	3
P42226	369	LKKIKRCER	3
P42226	636	EQMGKDGRG	3
P42226	647	PATIKMTVE	3
Q15170	6	DKPRKENEE	3
Q15170	30	STLPKSSPP	3
Q15170	74	GLSRKDLFE	3
Q15170	141	RVRNKLMIM	3
Q07912	48	EDLEKIGMG	3
Q07912	64	WEAVKRRKA	3
Q07912	67	VKRRKALCK	3
Q07912	71	KALCKRKSW	3
Q07912	131	RLLEKLGDG	3
Q07912	158	SVAVKCLKP	3
Q07912	291	QEHRKVPFA	3
Q07912	342	QILHKIDKE	3
Q07912	371	CWAHKPEDR	3
Q07912	515	GGVKKPTYD	3
Q07912	533	SSDFKRLGL	3
Q69YN4	156	QPSLKRNPK	3
Q69YN4	160	KRNPKHADG	3
Q69YN4	373	QGPDKENSG	3
Q69YN4	384	EASVKLTEL	3
Q69YN4	567	LSEIKRLGD	3
Q69YN4	576	HLAEKTSSL	3
Q69YN4	705	LQATKDVLK	3
Q69YN4	844	SKSKKSVAY	3
Q69YN4	955	QKDLKWNLA	3
Q69YN4	978	RVLQKLNSI	3
Q69YN4	1014	LTLLKTMLT	3
Q69YN4	1239	HKACKLAIL	3
Q69YN4	1643	FRQRKQNTS	3
Q69YN4	1795	GSRGKFVSG	3
P37231	107	QSAIKVEPA	3
P37231	145	VCGDKASGF	3
P37231	184	CRIHKKSRN	3
P37231	197	CRFQKCLAV	3
P37231	218	PQAEKEKLL	3
P37231	244	RALAKHLYD	3
P37231	268	ILTGKTTDK	3
P37231	272	KTTDKSPFV	3
P37231	329	TEYAKSIPG	3
P37231	382	REFLKSLRK	3
P37231	386	KSLRKPFGD	3
P37231	485	LQVIKKTET	3
Q9UBK2	184	PAIVKTENS	3
Q9UBK2	201	CQQQKPQRR	3
Q9UBK2	240	CTSKKKSHT	3
Q9UBK2	315	RASPKLKSS	3
Q9UBK2	360	AQLSKSSVL	3
Q9UBK2	372	HEERKTKRP	3
Q9UBK2	374	ERKTKRPSL	3
Q9UBK2	393	SINSKTEIL	3
Q9UBK2	451	CSTRKQLQD	3
Q9UBK2	480	DEADKTGEL	3
Q9UBK2	496	EQFSKLPMF	3
Q9UBK2	656	REYEKRESE	3
Q9UBK2	671	RQRQKAIEE	3
Q9UBK2	754	FCGRKQFFK	3
Q9UBK2	758	KQFFKSNYA	3
Q9UBK2	777	PASTKSKYD	3
P50549	25	NCNEKPTNV	3
P50549	31	TNVRKRKFI	3
P50549	33	VRKRKFINR	3
P50549	110	EQPFKFSYG	3
P50549	311	VVPEKFDGD	3
P35222	242	PALVKMLGS	3
P35222	433	CNNYKNKMM	3
P35222	508	WPLIKATVG	3
P35222	672	QDYKKRLSV	3
P51532	443	YKRSKRQSL	3
P51532	455	RITEKLEKQ	3
P51532	502	QKLTKAVAT	3
P51532	524	ERIEKERMR	3
P51532	800	LMEHKRING	3
P51532	934	PTIFKSCST	3
P51532	970	RRLHKVLRP	3
P51532	982	RRLKKEVEA	3
P51532	1033	KGGTKTLMN	3
P51532	1044	MQLRKICNH	3
P51532	1081	RASGKFELL	3
P51532	1091	RILPKLRAT	3
P51532	1140	GMLLKTFNE	3
P51532	1219	LAAAKYKLN	3
P51532	1332	ARNPKRKPR	3
P51532	1375	SRHRKEVDY	3
P51532	1408	VRQKKSSRK	3
P51532	1412	KSSRKRKRD	3
P51532	1441	SKKQKKRGR	3
P51532	1442	KKQKKRGRP	3
P51532	1566	QKIEKEDDS	3
P51532	1596	SVKVKIKLG	3
P51532	1604	GRKEKAQDR	3
Q09472	77	DAASKHKQL	3
Q09472	123	NSMVKSPMT	3
Q09472	243	PQPLKMGMM	3
Q09472	373	CRTMKNVLN	3
Q09472	418	CLPLKNAGD	3
Q09472	423	NAGDKRNQQ	3
Q09472	489	QVQAKNQQN	3
Q09472	601	PAALKDRRM	3
Q09472	654	TRLQKQNML	3
Q09472	970	AIAEKQPSQ	3
Q09472	1020	STELKTEIK	3
Q09472	1046	GQSKKKIFK	3
Q09472	1094	FDIVKSPMD	3
Q09472	1134	LYNRKTSRV	3
Q09472	1180	CCYGKQLCT	3
Q09472	1233	EQFSKRKND	3
Q09472	1253	ECGRKMHQI	3
Q09472	1284	ARTRKENKF	3
Q09472	1287	RKENKFSAK	3
Q09472	1331	HASDKTVEV	3
Q09472	1336	TVEVKPGMK	3
Q09472	1459	QKIPKPKRL	3
Q09472	1528	EEERKREEN	3
Q09472	1554	KKNNKKTSK	3
Q09472	1568	SRGNKKKPG	3
Q09472	1569	RGNKKKPGM	3
Q09472	1570	GNKKKPGMP	3
Q09472	1707	HKMEKLGLG	3
Q09472	1772	TKGCKRKTN	3
Q09472	1800	CQENKCPVP	3
P04637	101	VPSQKTYQG	3
P04637	321	QPKKKPLDG	3
P04637	370	SSHLKSKKG	3
P04637	386	KLMFKTEGP	3
Q9UNE7	22	GSPEKSPSA	3
Q9UNE7	30	AQELKEQGN	3
Q9UNE7	41	FVGRKYPEA	3
Q9UNE7	95	GQSVKAHFF	3
Q9UNE7	145	IAKKKRWNS	3
Q9UNE7	203	CIEAKHDKY	3
Q9UNE7	224	EKRKKRDIP	3
Q99750	129	KAHRKLQTH	3
Q99750	143	QGSKKSKSS	3
Q99750	145	SKKSKSSSK	3
Q99750	149	KSSSKSTTS	3
Q9P1T7	36	GKCDKDNTE	3
Q9P1T7	148	DISKKSKVN	3
O94953	124	RKYWKNLTF	3
O94953	183	FGMWKTTFA	3
O94953	252	PIILKKYGI	3
O94953	366	RASLKAKLL	3
O94953	409	GGSVKEEAG	3
O94953	451	PTKAKSERK	3
O94953	588	RMETKARAG	3
O94953	602	STFSKLKME	3
O94953	857	VYCRKRMKK	3
O94953	861	KRMKKVSGA	3
O94953	905	ITCLKHKSG	3
O94953	928	VVITKNRNG	3
O94953	1019	QLTVKRGDI	3
P55317	160	GGDAKTFKR	3
P55317	163	AKTFKRSYP	3
P55317	189	QAPSKMLTL	3
P55317	237	RSPDKPGKG	3
P55317	264	LRRQKRFKC	3
P55317	267	QKRFKCEKQ	3
P55317	270	FKCEKQPGA	3
P55317	295	PESRKDPSG	3
P14859	73	NVQSKSNEE	3
P14859	272	QSTPKRIDT	3
P14859	293	EQFAKTFKQ	3
P14859	301	QRRIKLGFT	3
P14859	315	LAMGKLYGN	3
P14859	381	SRRRKKRTS	3
P14859	396	VALEKSFLE	3
Q99814	5	MTADKEKKR	3
Q99814	8	DKEKKRSSS	3
Q99814	158	GFGKKSKDM	3
Q99814	160	GKKSKDMST	3
Q99814	186	TVNLKSATW	3
Q99814	312	RMLAKHGGY	3
Q99814	385	AVSEKSNFL	3
Q99814	595	QLESKKTEP	3
Q99814	685	TRSAKGFGA	3
Q99814	741	WKRMKNLRG	3
Q99814	796	GENSKSRFP	3
Q99814	818	SSAHKVSGM	3
Q9HAZ2	146	GCITKISED	3
Q9HAZ2	195	QIYYKVIKD	3
Q9HAZ2	401	EVCHKSYTQ	3
Q9HAZ2	413	LCRHKRMHA	3
Q9HAZ2	424	RTQIKCKDC	3
Q9HAZ2	641	KGKGKSAEG	3
Q9HAZ2	648	EGQPKFGGG	3
Q9HAZ2	714	GMQEKKLGS	3
Q9HAZ2	756	KAEPKSPRD	3
Q9HAZ2	824	REPRKNHVY	3
Q9HAZ2	832	YGERKLGAG	3
Q9HAZ2	872	SRVEKRKVT	3
Q9HAZ2	874	VEKRKVTDP	3
Q9HAZ2	946	PILRKGKER	3
Q9HAZ2	1094	TRTEKRADM	3
Q9HAZ2	1137	SLAGKSQDD	3
Q9HAZ2	1222	SEALKHTLC	3
Q9HAZ2	1230	CRQAKNQAY	3
O14497	51	RGEMKAAAG	3
O14497	327	GGAGKGPAD	3
O14497	994	KTESKSKKS	3
O14497	997	SKSKKSSSS	3
O14497	1007	TTNEKITKL	3
O14497	1034	FTEEKAMGM	3
O14497	1047	AVGRKPLDL	3
O14497	1201	STFQKRNSM	3
O14497	1662	RLTMKDIGT	3
O14497	1752	GRFSKVSSP	3
O14497	1880	PAPRKHVTT	3
O14497	1905	GPPEKRITA	3
O14497	2189	IAVQKGSIG	3
Q92925	117	DPFRKRLLV	3
Q92925	139	LKRRKMADK	3
Q92925	185	QEAIKKPLT	3
Q92925	193	TQKRKLRIY	3
Q92925	237	RVEGKLLDD	3
Q92925	248	KQKRKFSSF	3
Q92925	376	EIPMKLAGL	3
Q92925	480	RRDLKIITD	3
P17252	76	FVVHKRCHE	3
P17252	165	RIYLKAEVA	3
P17252	213	KQKTKTIRS	3
P17252	347	MVLGKGSFG	3
P17252	434	QQVGKFKEP	3
P17252	517	QPYGKSVDW	3
P17252	579	KHPAKRLGC	3
P22694	9	ATAKKGSEV	3
P22694	48	FERKKTLGT	3
P22694	64	LVKHKATEQ	3
P22694	82	QKVVKLKQI	3
P22694	190	FGFAKRVKG	3
P22694	280	VDLTKRFGN	3
P22694	346	EKCAKEFGE	3
P22612	8	APAKKDTEQ	3
P22612	82	QKVVKMKQV	3
P22612	190	FGFAKRVKG	3
P22612	280	VDLTKRFGN	3
P22612	318	PFIPKYTGP	3
P10644	32	QALLKDSIV	3
P10644	123	PKDYKTMAA	3
P10644	218	TVKAKTNVK	3
P10644	222	KTNVKLWGI	3
P10644	244	LRKRKMYEE	3
P13861	122	VIHPKTDEQ	3
P13861	135	QEACKDILL	3
P13861	243	RIIVKNNAK	3
P13861	250	AKKRKMFES	3
P13861	315	RSRTKSNKD	3
P13861	318	TKSNKDGGN	3
P13861	391	EQLVKMFGS	3
P31321	32	QQVLKDCIV	3
P31321	70	LARQKSNSQ	3
P31321	123	PKDYKTMTA	3
P31321	218	TVKAKTDLK	3
P31321	222	KTDLKLWGI	3
P31321	244	LRKRKMYEE	3
P31323	46	ENERKGTAR	3
P31323	72	GTPSKGVNF	3
P31323	137	IIHPKTDDQ	3
P31323	150	QEACKDILL	3
P31323	204	DIYVKCDGV	3
P31323	258	RIIVKNNAK	3
P31323	265	AKKRKMYES	3
P31323	322	SGEVKITMK	3
P31323	330	KRKGKSEVE	3
O60674	207	SISYKTFLP	3
O60674	217	CIRAKIQDY	3
O60674	227	ILTRKRIRY	3
O60674	346	VTIHKQDGK	3
O60674	430	RCSPKDFNK	3
O60674	502	CCPPKPKDK	3
O60674	688	EEDRKTGNP	3
O60674	736	LATDKWSFG	3
O60674	882	VVAVKKLQH	3
P40763	49	YAASKESHA	3
P40763	140	VVTEKQQML	3
P40763	244	LADWKRRQQ	3
P40763	282	RQQIKKLEE	3
P40763	283	QQIKKLEEL	3
P40763	318	RNLMKSAFV	3
P40763	370	VCIDKDSGD	3
P40763	383	RGSRKFNIL	3
P40763	392	GTNTKVMNM	3
P40763	531	TLAEKLLGP	3
P40763	551	AKFCKENMA	3
P40763	631	DISGKTQIQ	3
P52597	14	GFVVKLRGL	3
P52597	150	DPEGKITGE	3
P52597	167	ELAEKALGK	3
P52597	299	GLPYKATEN	3
P05412	35	PKILKQSMT	3
P05412	226	LQALKEEPQ	3
P05412	268	IAASKCRKR	3
P62736	63	EAQSKRGIL	3
P47756	23	QQIEKNLSD	3
P47756	53	IARDKVVGK	3
P47756	95	ARLRKLEVE	3
P47756	135	VILIKKAGD	3
P47756	142	GDGSKKIKG	3
P47756	168	TAHYKLTST	3
P47756	199	RQMEKDETV	3
Q16633	25	GVRVKEPVK	3
Q16633	35	LLRRKRGHA	3
P08151	180	TCQLKSELD	3
P08151	226	EREEKREPE	3
P08151	302	EKPHKCTFE	3
P08151	310	EGCRKSYSR	3
P08151	329	HTGEKPYMC	3
P08151	395	AHVTKRHRG	3
P08151	415	TVEPKRERE	3
P08151	794	YPGPKALGG	3
O75582	43	GHAEKVGIE	3
O75582	62	GAYGKVFLV	3
O75582	68	FLVRKISGH	3
O75582	85	KVLKKATIV	3
O75582	126	QTETKLHLI	3
O75582	299	MKDPKKRLG	3
O75582	300	KDPKKRLGC	3
O75582	330	LAAKKVPAP	3
O75582	370	QSSEKLFQG	3
O75582	385	SILFKRNAA	3
O75582	442	SICRKCVHK	3
O75582	459	KIISKRMEA	3
O75582	513	RIKKKKHFS	3
O75582	527	YIMRKLVSA	3
O75582	580	NQPLKTPCF	3
O75582	640	EIMKKIKKG	3
O75582	654	GEAWKNVSQ	3
O75582	677	NKRLKMSGL	3
O75582	716	HTCVKATFH	3
O75582	726	FNKYKREGF	3
O75582	745	AKRRKMKKT	3
O75582	773	HSHGKTTPT	3
O75582	778	TTPTKTLQP	3
P42224	85	HNIRKSKRN	3
P42224	87	IRKSKRNLQ	3
P42224	240	LVEWKRRQQ	3
P42224	278	RQQLKKLEE	3
P42224	279	QQLKKLEEL	3
P42224	388	GTHTKVMNM	3
P42224	413	LKEQKNAGT	3
P42224	592	RALLKDQQP	3
P42224	697	LDGPKGTGY	3
P55072	8	GADSKGDDL	3
P55072	63	LKGKKRREA	3
P55072	81	CSDEKIRMN	3
P55072	112	VKYGKRIHV	3
P55072	148	RPIRKGDIF	3
P55072	190	GEPIKREDE	3
P55072	211	GGCRKQLAQ	3
P55072	231	PALFKAIGV	3
P55072	236	AIGVKPPRG	3
P55072	277	EIMSKLAGE	3
P55072	386	QIHTKNMKL	3
P55072	505	DKFLKFGMT	3
P55072	584	DSIAKARGG	3
P55072	663	ANLRKSPVA	3
P55072	677	EFLAKMTNG	3
P55072	754	NDIRKYEMF	3
P49368	21	ESGRKVQSG	3
P49368	31	INAAKTIAD	3
P49368	78	HPAAKSMIE	3
P49368	128	SAYRKALDD	3
P49368	234	RRYIKNPRI	3
P49368	370	CKDPKACTI	3
P49368	381	RGASKEILS	3
P49368	491	LVDMKELGI	3
P49368	507	LQTYKTAVE	3
P51114	17	GAFYKGFIK	3
P51114	123	KTVKKNTFF	3
P51114	128	NTFFKCTVD	3
P51114	151	HKDFKKAVG	3
P51114	179	EATVKRVNI	3
P51114	273	ADAVKKARG	3
P51114	274	DAVKKARGF	3
P51114	302	GKNGKVIQE	3
P51114	310	EIVDKSGVV	3
P51114	341	FVGTKESIG	3
P51114	462	PRGGKSSIS	3
P51114	562	LAKNKKEMA	3
P51114	578	GPSEKAING	3
P03372	171	STNDKGSMA	3
P03372	210	KAFFKRSIQ	3
P03372	231	CTIDKNRRK	3
P03372	235	KNRRKSCQA	3
P03372	266	GRMLKHKRQ	3
P03372	362	INWAKRVPG	3
P03372	416	RNQGKCVEG	3
P03372	449	FVCLKSIIL	3
Q03164	169	SPSVKTSPR	2
Q03164	201	SPLNKSETK	2
Q03164	205	KSETKSGDK	2
Q03164	211	GDKIKKKDS	2
Q03164	212	DKIKKKDSK	2
Q03164	213	KIKKKDSKS	2
Q03164	220	KSIEKKRGR	2
Q03164	239	ITHGKDISE	2
Q03164	249	PKGNKEDSL	2
Q03164	271	ATKIKKLRA	2
Q03164	282	LSPLKSKFK	2
Q03164	284	PLKSKFKTG	2
Q03164	286	KSKFKTGKL	2
Q03164	329	EKPQKVRKD	2
Q03164	334	VRKDKEGTP	2
Q03164	356	PRRIKPVRI	2
Q03164	373	ATIAKQLLQ	2
Q03164	380	LQRAKKGAQ	2
Q03164	385	KGAQKKIEK	2
Q03164	389	KKIEKEAAQ	2
Q03164	404	KTQVKNIRQ	2
Q03164	544	SRTTKKLST	2
Q03164	607	PMQGKRKSI	2
Q03164	623	WTSLKHSRS	2
Q03164	639	AKYAKEGLI	2
Q03164	692	FDMHKRSPL	2
Q03164	812	ESAEKNQRP	2
Q03164	851	RGRNKDKAP	2
Q03164	853	RNKDKAPEE	2
Q03164	872	VEKDKSRER	2
Q03164	882	REREKENKR	2
Q03164	894	KEKRKKGSE	2
Q03164	895	EKRKKGSEI	2
Q03164	915	VSKEKVVGE	2
Q03164	928	SSSAKKATG	2
Q03164	935	TGRKKSSSH	2
Q03164	959	AVKTKILIK	2
Q03164	964	ILIKKGRGN	2
Q03164	987	LEKEKTLCL	2
Q03164	1021	PMTDKRVAS	2
Q03164	1031	LKKAKAQLC	2
Q03164	1036	AQLCKIEKS	2
Q03164	1041	IEKSKSLKQ	2
Q03164	1050	TDQPKAQGQ	2
Q03164	1069	GPRIKHVCR	2
Q03164	1133	IKPIKPVTR	2
Q03164	1139	VTRNKAPQE	2
Q03164	1178	LDKPKFGGR	2
Q03164	1186	RNIKKQCCK	2
Q03164	1190	KQCCKMRKC	2
Q03164	1215	KAVKKKEKK	2
Q03164	1216	AVKKKEKKS	2
Q03164	1218	KKKEKKSKT	2
Q03164	1225	KTSEKKDSK	2
Q03164	1229	KKDSKESSV	2
Q03164	1243	DSSQKPTPS	2
Q03164	1255	DPAPKKSSS	2
Q03164	1265	PPPRKPVEE	2
Q03164	1284	GPESKQATT	2
Q03164	1345	QSKQKKVAP	2
Q03164	1346	SKQKKVAPR	2
Q03164	1356	SIPVKQKPK	2
Q03164	1358	PVKQKPKEK	2
Q03164	1360	KQKPKEKEK	2
Q03164	1390	GNSSKQKIP	2
Q03164	1517	NYPTKPTKK	2
Q03164	1520	TKPTKKKKV	2
Q03164	1522	PTKKKKVWI	2
Q03164	1523	TKKKKVWIC	2
Q03164	1529	WICTKCVRC	2
Q03164	1543	TTPGKGWDA	2
Q03164	1590	MQCGKCDRW	2
Q03164	1598	WVHSKCENL	2
Q03164	1638	LALEKELQI	2
Q03164	1748	QPEIKKANS	2
Q03164	1755	NSMVKSFFI	2
Q03164	1773	FSVKKSRFW	2
Q03164	1830	APKPKGPGE	2
Q03164	1929	VIRGKQLRC	2
Q03164	1962	CSRAKNCVF	2
Q03164	1982	RDLIKGEVV	2
Q03164	2043	DCEDKLFPI	2
Q03164	2141	HVISKVPRI	2
Q03164	2206	PQRSKLRIM	2
Q03164	2276	TVGNKNSHL	2
Q03164	2299	DLVSKSSSL	2
Q03164	2309	GEKTKVLSS	2
Q03164	2428	DRRQKGKKS	2
Q03164	2444	KHSSKSFLE	2
Q03164	2490	KIGDKGLSM	2
Q03164	2528	LTPLKMENE	2
Q03164	2540	KNALKESSP	2
Q03164	2613	DGSFKRRYP	2
Q03164	2654	SSTGKKRGK	2
Q03164	2713	CDLPKISQL	2
Q03164	2764	DAGEKEHVT	2
Q03164	2775	SVGHKNEPK	2
Q03164	2830	TELLKSDSD	2
Q03164	2855	DFVLKNTPS	2
Q03164	2889	SNREKDMGL	2
Q03164	2958	DSGEKRVTI	2
Q03164	3045	IQNQKYVPN	2
Q03164	3077	PATEKLIVV	2
Q03164	3151	PSASKGLLP	2
Q03164	3220	SGLKKRPIS	2
Q03164	3232	TRKNKKLAP	2
Q03164	3287	PNIIKRSKS	2
Q03164	3537	PTKPKPKTK	2
Q03164	3539	KPKPKTKRF	2
Q03164	3541	KPKTKRFQL	2
Q03164	3549	LPLDKGNGK	2
Q03164	3554	GNGKKHKVS	2
Q03164	3663	SITEKKPKK	2
Q03164	3666	EKKPKKGLV	2
Q03164	3667	KKPKKGLVF	2
Q03164	3707	NARLKQLSF	2
Q03164	3749	FRFHKPEEA	2
Q03164	3784	FLASKHRQP	2
Q03164	3873	DKREKYYDS	2
Q03164	3878	YYDSKGIGC	2
Q03164	3954	DASNKLPCN	2
Q03164	3962	NCGAKKCRK	2
Q9Y4C1	59	DVTKKDLKV	2
Q9Y4C1	62	KKDLKVCVE	2
Q9Y4C1	117	AITYKPLLD	2
Q9Y4C1	122	PLLDKAGLG	2
Q9Y4C1	196	GSEVKIYSL	2
Q9Y4C1	232	IPALKIVDP	2
Q9Y4C1	298	TTVFKEILL	2
Q9Y4C1	332	NLGAKIPQG	2
Q9Y4C1	339	QGCHKQSLP	2
Q9Y4C1	387	LTEPKGSCT	2
Q9Y4C1	421	CLPTKASSK	2
Q9Y4C1	425	KASSKAELE	2
Q9Y4C1	470	NCSGKKVEP	2
Q9Y4C1	471	CSGKKVEPS	2
Q9Y4C1	485	SQNLKESSV	2
Q9Y4C1	503	RSNNKIQNA	2
Q9Y4C1	521	PAKLKKLQQ	2
Q9Y4C1	522	AKLKKLQQS	2
Q9Y4C1	545	AQLPKCREC	2
Q9Y4C1	556	DSLRKDKEQ	2
Q9Y4C1	558	LRKDKEQQK	2
Q9Y4C1	580	LQFNKHGVL	2
Q9Y4C1	594	LTPNKYDNE	2
Q9Y4C1	608	LPLTKNVVG	2
Q9Y4C1	729	IIPGKALYD	2
Q9Y4C1	744	SVRAKWGIK	2
Q9Y4C1	759	NRQFKLFSK	2
Q9Y4C1	767	KPASKEDLK	2
Q9Y4C1	771	KEDLKQTSL	2
Q9Y4C1	834	GNVNKENKE	2
Q9Y4C1	837	NKENKEKQP	2
Q9Y4C1	861	PPLSKSSTV	2
Q9Y4C1	901	ENGLKNTPK	2
Q9Y4C1	933	GLTIKPSIL	2
Q9Y4C1	960	DPNNKSNWN	2
Q9Y4C1	971	RECWKQGQP	2
Q9Y4C1	1113	PEDRKYGTT	2
Q9Y4C1	1148	EEVLKTIQD	2
Q9Y4C1	1161	ELTIKRFIE	2
Q9Y4C1	1190	REFLKKVSE	2
Q9Y4C1	1305	YHAVKDAVA	2
Q9Y4C1	1312	VAMLKASES	2
Q9Y2Z0	69	VADAKKSLE	2
Q9Y2Z0	85	AMLRKGICE	2
Q9Y2Z0	173	QSKIKYDWY	2
Q9Y2Z0	236	QSTFKVLST	2
Q9Y2Z0	245	KIEIKLKKP	2
Q9Y2Z0	247	EIKLKKPEA	2
Q9Y2Z0	248	IKLKKPEAV	2
Q9Y2Z0	274	VADVKNLYP	2
Q9Y2Z0	349	SDVGKRKVE	2
Q9Y2Z0	351	VGKRKVEIN	2
Q12931	67	TAEDKEEPL	2
Q12931	87	GSTSKHEFQ	2
Q12931	126	DALEKLRHK	2
Q12931	181	RSGSKAFLD	2
Q12931	276	DVVTKYSNF	2
Q12931	332	TLHYKTDAP	2
Q12931	349	VPDMKPSMF	2
Q12931	369	LYSRKVLIQ	2
Q12931	382	DILPKWLRF	2
Q12931	413	ALIRKLRDV	2
Q12931	432	DQSKKDAEK	2
Q12931	436	KDAEKYAKF	2
Q12931	439	EKYAKFFED	2
Q12931	461	EQEVKEDIA	2
Q12931	518	YEAMKKKDT	2
Q12931	519	EAMKKKDTE	2
Q12931	520	AMKKKDTEV	2
Q12931	544	REFDKKKLI	2
Q12931	563	YKEEKFEDR	2
Q12931	652	HALIKKLNQ	2
P07900	58	DALDKIRYE	2
P07900	69	TDPSKLDSG	2
P07900	84	LIPNKQDRT	2
P07900	116	KSGTKAFME	2
P07900	153	TVITKHNDD	2
P07900	204	ERRIKEIVK	2
P07900	209	EIVKKHSQF	2
P07900	238	EAEEKEDKE	2
P07900	241	EKEDKEEEK	2
P07900	250	EKEEKESED	2
P07900	269	EEEEKKDGD	2
P07900	276	GDKKKKKKI	2
P07900	277	DKKKKKKIK	2
P07900	278	KKKKKKIKE	2
P07900	279	KKKKKIKEK	2
P07900	281	KKKIKEKYI	2
P07900	283	KIKEKYIDQ	2
P07900	292	EELNKTKPI	2
P07900	327	HLAVKHFSV	2
P07900	356	FENRKKKNN	2
P07900	358	NRKKKNNIK	2
P07900	407	LQQSKILKV	2
P07900	410	SKILKVIRK	2
P07900	431	LAEDKENYK	2
P07900	443	EQFSKNIKL	2
P07900	446	SKNIKLGIH	2
P07900	458	QNRKKLSEL	2
P07900	478	MVSLKDYCT	2
P07900	539	EFEGKTLVS	2
P07900	567	EKKTKFENL	2
P07900	581	DILEKKVEK	2
P07900	585	KKVEKVVVS	2
P07900	615	ERIMKAQAL	2
P07900	631	YMAAKKHLE	2
P07900	654	AEADKNDKS	2
P07900	660	DKSVKDLVI	2
P08238	53	DALDKIRYE	2
P08238	64	TDPSKLDSG	2
P08238	111	KSGTKAFME	2
P08238	148	VVITKHNDD	2
P08238	199	ERRVKEVVK	2
P08238	204	EVVKKHSQF	2
P08238	237	EKGEKEEED	2
P08238	267	KDKKKKTKK	2
P08238	270	KKKTKKIKE	2
P08238	271	KKTKKIKEK	2
P08238	273	TKKIKEKYI	2
P08238	275	KIKEKYIDQ	2
P08238	284	EELNKTKPI	2
P08238	319	HLAVKHFSV	2
P08238	350	NKKKKNNIK	2
P08238	399	LQQSKILKV	2
P08238	402	SKILKVIRK	2
P08238	411	NIVKKCLEL	2
P08238	423	LAEDKENYK	2
P08238	435	EAFSKNLKL	2
P08238	438	SKNLKLGIH	2
P08238	477	VSRMKETQK	2
P08238	481	KETQKSIYY	2
P08238	531	EFDGKSLVS	2
P08238	550	DEEEKKKME	2
P08238	573	EILDKKVEK	2
P08238	607	ERIMKAQAL	2
P08238	624	MMAKKHLEI	2
P08238	646	AEADKNDKA	2
P08238	649	DKNDKAVKD	2
P0DMV8	25	FQHGKVEII	2
P0DMV8	88	QSDMKHWPF	2
P0DMV8	102	GDKPKVQVS	2
P0DMV8	126	MVLTKMKEI	2
P0DMV8	128	LTKMKEIAE	2
P0DMV8	190	DRTGKGERN	2
P0DMV8	246	VEEFKRKHK	2
P0DMV8	248	EFKRKHKKD	2
P0DMV8	250	KRKHKKDIS	2
P0DMV8	257	ISQNKRAVR	2
P0DMV8	325	LRDAKLDKA	2
P0DMV8	328	AKLDKAQIH	2
P0DMV8	345	TRIPKVQKL	2
P0DMV8	348	PKVQKLLQD	2
P0DMV8	384	LMGDKSENV	2
P0DMV8	507	ITNDKGRLS	2
P0DMV8	550	AFNMKSAVE	2
P0DMV8	561	GLKGKISEA	2
P0DMV8	567	SEADKKKVL	2
P0DMV8	568	EADKKKVLD	2
P0DMV8	573	KVLDKCQEV	2
P0DMV8	589	TLAEKDEFE	2
P0DMV8	595	EFEHKRKEL	2
P0DMV8	597	EHKRKELEQ	2
P0DMV9	25	FQHGKVEII	2
P0DMV9	88	QSDMKHWPF	2
P0DMV9	102	GDKPKVQVS	2
P0DMV9	126	MVLTKMKEI	2
P0DMV9	128	LTKMKEIAE	2
P0DMV9	190	DRTGKGERN	2
P0DMV9	246	VEEFKRKHK	2
P0DMV9	248	EFKRKHKKD	2
P0DMV9	250	KRKHKKDIS	2
P0DMV9	257	ISQNKRAVR	2
P0DMV9	325	LRDAKLDKA	2
P0DMV9	328	AKLDKAQIH	2
P0DMV9	345	TRIPKVQKL	2
P0DMV9	348	PKVQKLLQD	2
P0DMV9	384	LMGDKSENV	2
P0DMV9	507	ITNDKGRLS	2
P0DMV9	550	AFNMKSAVE	2
P0DMV9	561	GLKGKISEA	2
P0DMV9	567	SEADKKKVL	2
P0DMV9	568	EADKKKVLD	2
P0DMV9	573	KVLDKCQEV	2
P0DMV9	589	TLAEKDEFE	2
P0DMV9	595	EFEHKRKEL	2
P0DMV9	597	EHKRKELEQ	2
P12004	13	GSILKKVLE	2
P12004	14	SILKKVLEA	2
P12004	20	LEALKDLIN	2
P12004	217	NFFTKATPL	2
P12004	240	VVEYKIADM	2
P12004	254	YLAPKIEDE	2
P11142	25	FQHGKVEII	2
P11142	88	QSDMKHWPF	2
P11142	112	KGETKSFYP	2
P11142	126	MVLTKMKEI	2
P11142	128	LTKMKEIAE	2
P11142	137	AYLGKTVTN	2
P11142	187	YGLDKKVGA	2
P11142	188	GLDKKVGAE	2
P11142	248	EFKRKHKKD	2
P11142	250	KRKHKKDIS	2
P11142	257	ISENKRAVR	2
P11142	325	LRDAKLDKS	2
P11142	345	TRIPKIQKL	2
P11142	348	PKIQKLLQD	2
P11142	361	KELNKSINP	2
P11142	384	LSGDKSENV	2
P11142	507	ITNDKGRLS	2
P11142	535	KQRDKVSSK	2
P11142	539	KVSSKNSLE	2
P11142	550	AFNMKATVE	2
P11142	557	VEDEKLQGK	2
P11142	573	KILDKCNEI	2
P11142	609	PIITKLYQS	2
P62424	5	MPKGKKAKG	2
P62424	10	KAKGKKVAP	2
P62424	11	AKGKKVAPA	2
P62424	20	PAVVKKQEA	2
P62424	21	AVVKKQEAK	2
P62424	25	KQEAKKVVN	2
P62424	34	PLFEKRPKN	2
P62424	56	TRFVKWPRY	2
P62424	75	YKRLKVPPA	2
P62424	97	TQLLKLAHK	2
P62424	101	KLAHKYRPE	2
P62424	107	RPETKQEKK	2
P62424	110	TKQEKKQRL	2
P62424	111	KQEKKQRLL	2
P62424	150	LVENKKAQL	2
P62424	176	ALCRKMGVP	2
P62424	185	YCIIKGKAR	2
P62424	245	VLGPKSVAR	2
P62424	252	ARIAKLEKA	2
P62424	255	AKLEKAKAK	2
P62424	259	KAKAKELAT	2
P62424	264	ELATKLG	2
P15880	54	ARGGKAEDK	2
P15880	74	VKDMKIKSL	2
P15880	76	DMKIKSLEE	2
P15880	114	MPVQKQTRA	2
P15880	142	GLGVKCSKE	2
P15880	145	VKCSKEVAT	2
P15880	159	IILAKLSIV	2
P15880	176	NKIGKPHTV	2
P15880	257	PDLWKETVF	2
P15880	275	DHLVKTHTR	2
P31689	23	QEELKKAYR	2
P31689	32	KLALKYHPD	2
P31689	46	GEKFKQISQ	2
P31689	105	ERRGKNVVH	2
P31689	130	LALQKNVIC	2
P31689	144	RGGKKGAVE	2
P31689	205	IVREKKILE	2
P31689	206	VREKKILEV	2
P31689	217	DKGMKDGQK	2
P31689	221	KDGQKITFH	2
P31689	275	CGFQKPIST	2
P31689	317	RPYEKGRLI	2
P31689	325	IIEFKVNFP	2
P31689	350	LPERKEVEE	2
O95816	5	MAQAKINAK	2
O95816	111	QESLKHATR	2
O95816	123	EVVNKFLDD	2
O95816	132	LGNAKSHLM	2
O95816	154	PVDQKFQSI	2
O95816	195	LEHSKGAGS	2
O60884	8	VADTKLYDI	2
O60884	46	NAGDKFKEI	2
O60884	48	GDKFKEISF	2
O60884	62	SNPEKRELY	2
O60884	139	LQLSKNVLC	2
O60884	199	VINEKDRCK	2
O60884	203	KDRCKKCEG	2
O60884	208	KCEGKKVIK	2
O60884	209	CEGKKVIKE	2
O60884	212	KKVIKEVKI	2
O60884	215	IKEVKILEV	2
O60884	226	DKGMKHGQR	2
P62701	6	ARGPKKHLK	2
P62701	7	RGPKKHLKR	2
P62701	53	RNRLKYALT	2
P62701	62	GDEVKKICM	2
P62701	63	DEVKKICMQ	2
P62701	75	KIDGKVRTD	2
P62701	94	ISIDKTGEN	2
P62701	122	EAKYKLCKV	2
P62701	125	YKLCKVRKI	2
P62701	134	FVGTKGIPH	2
P62701	168	LETGKITDF	2
P62701	174	TDFIKFDTG	2
P62701	230	FVIGKGNKP	2
P62701	254	EERDKRLAA	2
Q99598	52	ARHDKYERL	2
Q99598	58	ERLVKLSRD	2
Q99598	93	ESEIKLDGV	2
Q99598	242	EVSKKLYTL	2
Q99598	252	QSLAKVENA	2
P68032	52	GMGQKDSYV	2
P68032	120	ANREKMTQI	2
P68032	215	VRDIKEKLC	2
P68032	217	DIKEKLCYV	2
P68032	240	SSLEKSYEL	2
P68032	293	IDIRKDLYA	2
P68032	317	DRMQKEITA	2
P68032	338	PPERKYSVW	2
P10275	182	SADLKDILS	2
P10275	222	PTSSKDNYL	2
P10275	291	LAECKGSLL	2
P10275	349	LSLYKSGAL	2
P10275	388	HARIKLENP	2
P10275	558	FPPQKTCLI	2
P10275	581	CGSCKVFFK	2
P10275	591	AAEGKQKYL	2
P10275	610	KFRRKNCPS	2
P10275	826	LKNQKFFDE	2
P10275	862	YQLTKLLDS	2
Q8N6H7	7	AEPNKTEIQ	2
Q8N6H7	32	DCGAKNPSW	2
Q8N6H7	105	DANTKYNSR	2
Q8N6H7	209	SLELKSSII	2
Q8N6H7	215	SIIGKKKPA	2
Q8N6H7	216	IIGKKKPAA	2
Q8N6H7	235	LGAQKVSSQ	2
Q8N6H7	263	AADAKKQAE	2
Q8N6H7	264	ADAKKQAEE	2
Q8N6H7	290	KKEEKKLQN	2
Q8N6H7	299	LEGKKREQA	2
Q8N6H7	429	FAGAKAISS	2
Q8N6H7	493	IAQFKQGVK	2
P56211	20	EMEDKVTSP	2
P56211	33	EAKLKARYP	2
P56211	42	HLGQKPGGS	2
P56211	55	KRLQKGQKY	2
P56211	69	YNMAKAKMK	2
P56211	71	MAKAKMKNK	2
P56211	73	KAKMKNKQL	2
P56211	102	LPQRKPSLV	2
P35226	40	HSFCKTCIV	2
P35226	88	PGLFKNEMK	2
P35226	92	KNEMKRRRD	2
P35226	122	ADEDKRIIT	2
P35226	153	KDKEKSKEE	2
P35226	177	MHLRKFLRS	2
O60885	57	PNKPKRQTN	2
O60885	76	KTLWKHQFA	2
O60885	91	VDAVKLNLP	2
O60885	141	YIYNKPGDD	2
O60885	155	EALEKLFLQ	2
O60885	285	PVKTKKGVK	2
O60885	286	VKTKKGVKR	2
O60885	317	PKTTKLGQR	2
O60885	329	SRPVKPPKK	2
O60885	332	VKPPKKDVP	2
O60885	349	EKSSKVSEQ	2
O60885	355	SEQLKCCSG	2
O60885	368	MFAKKHAAY	2
O60885	404	MSTIKSKLE	2
O60885	406	TIKSKLEAR	2
O60885	456	MRFAKMPDE	2
O60885	519	QEQLKAVHE	2
O60885	535	PQQNKPKKK	2
O60885	537	QNKPKKKEK	2
O60885	538	NKPKKKEKD	2
O60885	541	KKKEKDKKE	2
O60885	544	EKDKKEKKK	2
O60885	546	DKKEKKKEK	2
O60885	547	KKEKKKEKH	2
O60885	550	KKKEKHKRK	2
O60885	552	KEKHKRKEE	2
O60885	554	KHKRKEEVE	2
O60885	562	EENKKSKAK	2
O60885	564	NKKSKAKEP	2
O60885	571	EPPPKKTKK	2
O60885	572	PPPKKTKKN	2
O60885	574	PKKTKKNNS	2
O60885	575	KKTKKNNSS	2
O60885	586	NVSKKEPAP	2
O60885	615	SYEEKRQLS	2
O60885	624	LDINKLPGE	2
O60885	694	AGSSKMKGF	2
O60885	726	APKSKKKGH	2
O60885	727	PKSKKKGHP	2
O60885	728	KSKKKGHPG	2
O60885	737	REQKKHHHH	2
O60885	1035	PQPAKPQQV	2
O60885	1092	NVQPKKQEL	2
O60885	1093	VQPKKQELR	2
O60885	1111	LVVVKEEKI	2
O60885	1114	VKEEKIHSP	2
O60885	1153	RPEMKPVDV	2
O60885	1192	VAPKKDLKI	2
O60885	1195	KKDLKIKNM	2
O60885	1197	DLKIKNMGS	2
O60885	1218	SSTAKSSSD	2
O60885	1234	AAREKEERE	2
O60885	1250	EHAEKEKER	2
Q14781	26	LRKGKLEYL	2
Q14781	32	EYLVKWRGW	2
Q14781	39	GWSSKHNSW	2
Q14781	60	LAFQKKEHE	2
Q14781	94	SRRSKLKEP	2
Q14781	96	RSKLKEPDA	2
Q14781	105	PSKSKSSSS	2
Q14781	131	DLDAKRGPR	2
Q14781	145	PVPQKKAQI	2
Q14781	174	PPEQKATRR	2
Q14781	199	APASKLPPP	2
Q14781	291	GLDLKVRTQ	2
Q14781	320	AVEQKVGNT	2
Q14781	410	TDTSKSEKL	2
Q14781	413	SKSEKLASR	2
Q14781	432	RDCVKGSAT	2
Q14781	518	TVTVKESPT	2
O00257	31	EYLVKWRGW	2
O00257	38	GWSPKYNTW	2
O00257	75	KRGPKPKPL	2
O00257	77	GPKPKPLVV	2
O00257	106	DNRAKLDLG	2
O00257	146	PPPGKSGKY	2
O00257	157	QLNSKKHHP	2
O00257	167	QPDPKMYDL	2
O00257	178	QGGHKEAPS	2
O00257	191	DLGAKSHPP	2
O00257	197	HPPDKWAQG	2
O00257	238	MPAPKEAVT	2
O00257	251	GGKMKIVKN	2
O00257	254	MKIVKNKNK	2
O00257	268	IVMSKYMEN	2
O00257	296	PSHKKRAAD	2
O00257	347	AGSRKLSPT	2
O00257	352	LSPTKEAFG	2
O00257	365	QLTTKPDLL	2
O00257	425	REPCKKRLT	2
O00257	426	EPCKKRLTA	2
O00257	534	LSEFKPFFG	2
O00257	555	TVTFKEYVT	2
Q9Y3E7	10	KTQEKPPKE	2
Q9Y3E7	13	EKPPKELVN	2
Q9Y3E7	43	REEEKVKRS	2
Q9Y3E7	45	EEKVKRSVK	2
Q9Y3E7	49	KRSVKDAAK	2
Q9Y3E7	53	KDAAKKGQK	2
Q9Y3E7	57	KKGQKDVCI	2
Q9Y3E7	65	IVLAKEMIR	2
Q9Y3E7	76	KAVSKLYAS	2
Q9Y3E7	119	QSLVKIPEI	2
Q96FZ7	8	LFGRKKQSR	2
Q96FZ7	67	LLKKKRYQE	2
Q96FZ7	113	ECLNKMHQV	2
Q96FZ7	189	NVPVKARPR	2
P33316	79	AAGWKGELP	2
P33316	102	ISPSKRARP	2
Q5VYK3	38	NIISKFLPP	2
Q5VYK3	46	PVLLKLSST	2
Q5VYK3	67	VHLNKRIKS	2
Q5VYK3	104	IIYVKMGYP	2
Q5VYK3	156	VESSKSASP	2
Q5VYK3	166	NLAEKPKTV	2
Q5VYK3	168	AEKPKTVQL	2
Q5VYK3	285	DLELKSKQS	2
Q5VYK3	301	AIINKMYKV	2
Q5VYK3	325	KPELKRDPV	2
Q5VYK3	334	STRVKLKIV	2
Q5VYK3	370	NTNSKLRTL	2
Q5VYK3	390	CPEIKIKPL	2
Q5VYK3	425	SAVGKLSSR	2
Q5VYK3	450	EALCKEEPE	2
Q5VYK3	567	YIQEKASHR	2
Q5VYK3	573	SHRMKTPVK	2
Q5VYK3	646	SSSNKSGET	2
Q5VYK3	690	KLATKFVDK	2
Q5VYK3	694	KFVDKTEWI	2
Q5VYK3	706	MNNSKEEMR	2
Q5VYK3	741	IKTTKDNHS	2
Q5VYK3	767	YLAKKKMRM	2
Q5VYK3	852	IPSSKETNK	2
Q5VYK3	892	SVEAKQIEL	2
Q5VYK3	934	PAGAKVNDV	2
Q5VYK3	949	VILNKHIIS	2
Q5VYK3	972	SLVRKLSTH	2
Q5VYK3	1036	LMTGKRVKH	2
Q5VYK3	1099	WNSRKGAAF	2
Q5VYK3	1161	DKYLKEILQ	2
Q5VYK3	1169	QDLVKNLTS	2
Q5VYK3	1201	DIIDKLPEI	2
Q5VYK3	1217	QDDIKESVR	2
Q5VYK3	1222	ESVRKAAEL	2
Q5VYK3	1233	KTLSKVCVK	2
Q5VYK3	1237	KVCVKMCDP	2
Q5VYK3	1280	NTLVKISKS	2
Q5VYK3	1295	PHAPKLIPA	2
Q5VYK3	1324	TEQEKAAMD	2
Q5VYK3	1376	GLGTKGGCA	2
Q5VYK3	1442	KLLQKLNGW	2
Q5VYK3	1456	EPIYKTSCA	2
Q5VYK3	1497	ADEEKSEKE	2
Q5VYK3	1500	EKSEKEECN	2
Q5VYK3	1534	TITQKALQS	2
Q5VYK3	1542	SQSWKMKAQ	2
Q5VYK3	1544	SWKMKAQGA	2
Q5VYK3	1556	ASIAKQTSS	2
Q5VYK3	1585	TWAGKEELL	2
Q5VYK3	1605	AELEKSVPN	2
Q5VYK3	1632	NVKYKIVAI	2
Q5VYK3	1644	ADILKATKE	2
Q5VYK3	1676	VRTTKNEEE	2
Q5VYK3	1719	QELCKLMCE	2
Q5VYK3	1726	CERLKLSTW	2
Q5VYK3	1731	LSTWKVQLG	2
Q5VYK3	1769	LETCKSITY	2
Q5VYK3	1778	SLENKTYSS	2
Q5VYK3	1839	ALLKKTLEN	2
Q15056	34	SRSQKELPT	2
Q15056	63	DAIFKDLSI	2
Q15056	80	KDTDKFKGF	2
Q15056	130	FGFRKGGPD	2
Q15056	214	RLQLKPRTV	2
Q15056	245	EVVQKEQE	2
O00321	19	PPGNKLAGL	2
O00321	275	LCDPKEVAR	2
O00321	294	MNYEKLSRG	2
P22102	20	TLAWKLAQS	2
P22102	44	ACSEKISNT	2
P22102	63	AQFCKEKKI	2
P22102	65	FCKEKKIEF	2
P22102	107	LESSKRFAK	2
P22102	125	TAQWKAFTK	2
P22102	129	KAFTKPEEA	2
P22102	148	ALVVKASGL	2
P22102	164	VAKSKEEAC	2
P22102	169	EEACKAVQE	2
P22102	178	IMQEKAFGA	2
P22102	251	LLKIKDTVL	2
P22102	306	LPLLKSDLY	2
P22102	350	GDYTKGVEI	2
P22102	378	LKNGKVVTH	2
P22102	405	EEAKKGLAA	2
P22102	438	SLTYKESGV	2
P22102	480	LFDLKAAGF	2
P22102	485	AAGFKDPLL	2
P22102	508	QLCNKHDTI	2
P22102	557	AGIAKACGK	2
P22102	561	KACGKAGCA	2
P22102	598	ERDQKLPHL	2
P22102	629	SLVRKIVAK	2
P22102	743	LVVSKEQTE	2
P22102	757	IQQHKEEAW	2
P22102	793	GSVLKNGSL	2
P22102	844	VISNKAAVA	2
P22102	866	VINHKLYKN	2
P22102	869	HKLYKNRVE	2
P22102	906	PFVQKWNGK	2
P22102	982	LAEHKIFPA	2
P22102	1003	GENGKICWV	2
Q13630	21	GLVGKAIQK	2
Q13630	25	KAIQKVVAD	2
Q13630	44	FVSSKDADL	2
Q13630	81	FRNIKYNLD	2
Q13630	89	DFWRKNVHM	2
Q13630	147	YSYAKRMID	2
Q13630	194	GLIHKVHLA	2
Q13630	253	EVSIKEAAE	2
Q13630	281	DGQFKKTAS	2
Q13630	302	FTPFKQAVK	2
P68431	15	STGGKAPRK	2
P68431	38	GGVKKPHRY	2
P68431	65	LLIRKLPFQ	2
P68431	123	TIMPKDIQL	2
Q16665	19	SERRKEKSR	2
Q16665	32	SRRSKESEV	2
Q16665	85	EDDMKAQMN	2
Q16665	118	DNVNKYMGL	2
Q16665	157	GLVKKGKEQ	2
Q16665	159	VKKGKEQNT	2
Q16665	172	FLRMKCTLT	2
Q16665	185	TMNIKSATW	2
Q16665	190	SATWKVLHC	2
Q16665	240	PLDSKTFLS	2
Q16665	289	DHLTKTHHD	2
Q16665	362	ECVLKPVES	2
Q16665	370	SSDMKMTQL	2
Q16665	377	QLFTKVESE	2
Q16665	392	DKLKKEPDA	2
Q16665	547	DTEAKNPFS	2
Q16665	625	TDELKTVTK	2
Q16665	649	THIHKETTS	2
Q16665	756	WKRVKGCKS	2
Q7Z6Z7	90	REQLKMLLL	2
Q7Z6Z7	173	SWGGKENGF	2
Q7Z6Z7	231	EQLDKISES	2
Q7Z6Z7	342	ERTPKLSSI	2
Q7Z6Z7	414	EALLKVIKF	2
Q7Z6Z7	469	DLCRKECPF	2
Q7Z6Z7	478	VIKPKIQRP	2
Q7Z6Z7	541	PTSLKHIIS	2
Q7Z6Z7	632	ERLFKVLLS	2
Q7Z6Z7	683	TAIIKLLEE	2
Q7Z6Z7	701	YICQKPSIQ	2
Q7Z6Z7	706	PSIQKADGT	2
Q7Z6Z7	797	FVNQKGLLP	2
Q7Z6Z7	829	AGVCKSILT	2
Q7Z6Z7	936	SVLSKLSQL	2
Q7Z6Z7	980	PKDEKAGTT	2
Q7Z6Z7	1035	DSKGKSKIT	2
Q7Z6Z7	1037	KGKSKITPA	2
Q7Z6Z7	1047	AARIKQIKP	2
Q7Z6Z7	1050	IKQIKPLLS	2
Q7Z6Z7	1107	SALTKLLTK	2
Q7Z6Z7	1147	FDERKYPYH	2
Q7Z6Z7	1247	VVTQKAAFT	2
Q7Z6Z7	1254	FTCIKNLWN	2
Q7Z6Z7	1260	LWNRKPLKV	2
Q7Z6Z7	1409	EEERKAREK	2
Q7Z6Z7	1413	KAREKQEEE	2
Q7Z6Z7	1424	KCLEKFQDA	2
Q7Z6Z7	1497	DVLIKAALP	2
Q7Z6Z7	1508	TSDTKTVSE	2
Q7Z6Z7	1559	NVLIKLLEV	2
Q7Z6Z7	1575	AKEQKEVQT	2
Q7Z6Z7	1581	VQTPKWITP	2
Q7Z6Z7	1595	DFYEKTAIS	2
Q7Z6Z7	1608	AQMTKYLQS	2
Q7Z6Z7	1690	PRLNKNSKN	2
Q7Z6Z7	1713	EMDIKRKEN	2
Q7Z6Z7	1733	TNTEKETSL	2
Q7Z6Z7	1840	HTMEKVVRS	2
Q7Z6Z7	1931	TTPLKPSPL	2
Q7Z6Z7	2043	SRDGKKDKE	2
Q7Z6Z7	2056	SEEGKQKGK	2
Q7Z6Z7	2058	EGKQKGKGS	2
Q7Z6Z7	2060	KQKGKGSKP	2
Q7Z6Z7	2157	VNEVKAALG	2
Q7Z6Z7	2218	RLFLKKGLV	2
Q7Z6Z7	2267	LFGSKSASS	2
Q7Z6Z7	2272	SASSKNKSE	2
Q7Z6Z7	2274	SSKNKSEQD	2
Q7Z6Z7	2703	EEETKITDK	2
Q7Z6Z7	2707	KITDKGKED	2
Q7Z6Z7	3244	IETPKLTTS	2
Q7Z6Z7	3278	KMESKSSNQ	2
Q7Z6Z7	3314	KHTEKHASG	2
Q7Z6Z7	3345	IQLAKVFPS	2
Q7Z6Z7	3370	ERGNKACSP	2
Q7Z6Z7	3405	SRKGKNSVK	2
Q7Z6Z7	3409	KNSVKSVPV	2
Q7Z6Z7	3558	KSPAKVSDG	2
Q7Z6Z7	3570	STDFKMVSS	2
Q7Z6Z7	3621	DTVLKLLLN	2
Q7Z6Z7	3716	MLTSKTSTQ	2
Q7Z6Z7	3835	PQGEKEKEE	2
Q7Z6Z7	3837	GEKEKEERP	2
Q7Z6Z7	3865	GECLKELEE	2
Q7Z6Z7	3897	ERESKPPVR	2
Q7Z6Z7	3912	LAHIKDEPP	2
Q7Z6Z7	3997	DFDVKRKYF	2
Q7Z6Z7	4108	LSYFKFVGR	2
Q7Z6Z7	4263	IDDLKSNTE	2
Q8IU81	19	CDLPKMPWA	2
Q8IU81	73	PPALKHPAT	2
Q8IU81	78	HPATKDLAA	2
Q8IU81	306	REPGKALAS	2
Q8IU81	579	DIKVKKERD	2
Q8IU81	580	IKVKKERDP	2
O15054	73	GHPSKPYYA	2
O15054	168	QHRAKVLPP	2
O15054	278	FQLTKPGLW	2
O15054	487	PAWLKGPAC	2
O15054	636	VSFPKTPEV	2
O15054	651	GPLSKAPQP	2
O15054	689	PAEFKILPD	2
O15054	708	ESIRKEEEQ	2
O15054	726	QPPLKEPFA	2
O15054	769	QEEEKKPPP	2
O15054	805	ASLLKSLAS	2
O15054	973	SGSCKRRQK	2
O15054	977	KRRQKEHQK	2
O15054	1008	KAKAKVPKE	2
[truncated: 1,980 more rows]
